# Supplementary material for: Fuzheng Nizeng Decoction regulated ferroptosis and endoplasmic reticulum stress in the treatment of gastric precancerous lesions: A mechanistic study based on metabolomics coupled with transcriptomics
Source: Front Pharmacol. 2022 Nov 23;13:1066244. doi: 10.3389/fphar.2022.1066244 (PMC9727497; doi:10.3389/fphar.2022.1066244)
Supplement: Supplementary file 3 [file Table1.XLSX]

## Sheet: Sheet1
NameEN	Class	SubClass	CompositeScore	SMILES	Formula	mzmed	rtmed	ppm	ms2Adduct	MS2	ZY12
3-Methylellagic acid 8-rhamnoside	phenylpropanoids(苯丙素类)	coumarins(香豆素类)	0.711468	COC1=C(O)C=C2C(=O)OC3=C4C(=CC(O)=C3OC3OC(C)C(O)C(O)C3O)C(=O)OC1=C24	C21H18O12	463.087	99.5989	0.963744374395288	[M+H]+	289.064;287.056;288.057;169.013;465.096	1.30297e+09
Ginsenoside-Rg1	terpenoids(萜类)	Panax Japonicus(竹节参);Panax Japonicus(竹节人参);Panax Quinquefolium(西洋参);Panax Quinquefolium(西洋参茎叶);Rubus Idaeus(覆盆子);Rubus Idaeus(丹参);Panax Ginseng(人参芦);Panax Ginseng(人参叶);Panax Ginseng(人参花蕾);Panax Ginseng(人参);Panax Pseudo-Ginseng(假人参);Ginseng Radix Rubra(红参);Codonopsis Convolvulacea(珠子参);Codonopsis Convolvulacea(鸡蛋参)	0.838852	CC(C)=CCCC(C)(OC1OC(CO)C(O)C(O)C1O)C1CCC2(C)C1C(O)CC1C3(C)CCC(O)C(C)(C)C3C(CC21C)OC1OC(CO)C(O)C(O)C1O	C42H72O14	845.49	207.506	0.160553457523486	[M+HCOO]-	799.494;845.496;799.521;845.526;637.435	1.13495e+09
Saussurea lactone	terpenoids(萜类)	lavandulane(薰衣草烷型单萜类);artemisane(蒿烷型单萜类);mycrane_monoterpenoids(月桂烷型单萜类);menthane_monoterpenoids(薄荷烷型单萜类)	0.839781	CC1C2CCC(C)(C=C)C(C2OC1=O)C(C)=C	C15H22O2	235.169	307.942	1.55555781556307	[M+H]+	235.168;217.16;189.165;133.101;119.086	9.10968e+08
Glycitein	flavonoids(黄酮类)	isoflavones(异黄酮类)	0.992225	COC1=C(C=C2C(=C1)C(=O)C(=CO2)C3=CC=C(C=C3)O)O	C16H12O5	285.076	212.091	1.54422659158458	[M+H]	285.075;270.052;253.049;225.054;286.077	7.22434e+08
Proline	alkaloid(生物碱)		0.996788	C1CC(NC1)C(=O)O	C5H9NO2	116.071	32.6532	2.28300548782827	[M+H]+	70.066;116.07;71.069;117.074;74.024	7.12303e+08
Liquiritin	flavonoids(黄酮类)	Amygdalus Communis(苦杏仁);Sini Tang(四逆汤);Glycyrrhiza Uralensis(甘草);Glycyrrhiza Uralensis(植物甘草);Glycyrrhiza Uralensis(乌拉尔甘草);Stemmacantha Uniflora(漏芦)	0.682595	OCC1OC(OC2=CC=C(C=C2)C2CC(=O)C3=C(O2)C=C(O)C=C3)C(O)C(O)C1O	C21H22O9	417.119	99.7349	0.370191315231066	[M-H]-	255.067;119.051;135.009;175.041;153.02	6.22674e+08
Emodin	quinones(醌类)	anthraquinones(蒽醌类)	1	CC1=CC2=C(C(=C1)O)C(=O)C3=C(C2=O)C=C(C=C3O)O	C15H10O5	271.06	106.391	1.25088550078363	[M+H]	271.062;272.066;153.018;253.18;119.05	5.95703e+08
Epiacoronene	terpenoids(萜类)	secoiridoid(裂环环烯醚萜类);mycrane_monoterpenoids(月桂烷型单萜类);iridoid(环戊烷环烯醚萜类)	1	CC(C)C1C(=O)CC(C)C11CC=C(C)C(=O)C1	C15H22O2	235.169	397.759	1.04532942273406	[M+H]+	219.176;237.182;161.132;85.064;201.165	5.88825e+08
Sinensetin	flavonoids(黄酮类)	flavones(黄酮类)	0.865641	COC1=C(C=C(C=C1)C2=CC(=O)C3=C(C(=C(C=C3O2)OC)OC)OC)OC	C20H20O7	373.129	337.237	2.53784459712525	[M+H]	373.128;343.08;312.099;329.102;357.099	4.96415e+08
Venoterpine	alkaloid(生物碱)	pyridines(吡啶类生物碱)	0.787575	CC1C(O)CC2=CC=NC=C12	C9H11NO	150.091	32.6532	2.83278365501609	[M+H]+	150.09;135.068;91.054;119.05;121.065	4.82893e+08
Biochanin-7-O-glucoside	flavonoids(黄酮类)	isoflavones(异黄酮类)	0.868395	O=C2C(=COC3=CC(OC1OC(CO)C(O)C(O)C1(O))=CC(O)=C23)C4=CC=C(OC)C=C4	C22H22O10	447.128	96.8757	2.55267843190432	[M+H]+	285.075;270.052;286.077;253.049;225.054	4.40388e+08
Cichoralexin	terpenoids(萜类)	mycrane_monoterpenoids(月桂烷型单萜类);lavandulane(薰衣草烷型单萜类);secoiridoid(裂环环烯醚萜类)	0.889727	CC1C2CCC(C)C3C(C2OC1=O)C(C)=CC3=O	C15H20O3	249.149	334.67	1.60497438396464	[M+H]+	249.151;231.138;175.148;203.143;189.127	4.33462e+08
Choline chloride			0.967998	C[N+](C)(C)CCO	C5H14NO	104.107	32.6532	0.636767948255477	[M]+	104.107;60.081;87.045;105.11;86.06	4.12806e+08
3beta,6beta-Dihydroxynortropane	alkaloid(生物碱)	piperidines(哌啶类生物碱)	0.891959	OC1CC2CC(O)CC1N2	C7H13NO2	144.102	32.6532	0.154420795288007	[M+H]+	144.101;84.08;145.105;58.065;74.061	4.01871e+08
tectorigenin	flavonoids(黄酮类)	isoflavones(异黄酮类)	0.999901	O=C1C(=COC2=CC(O)=C(OC)C(O)=C12)C=3C=CC(O)=CC3	C16H12O6	301.07	253.926	1.29181138468439	[M+H]+	301.074;286.048;302.073;287.05;121.028	3.92292e+08
6-Demethoxytangeretin	flavonoids(黄酮类)	flavones(黄酮类)	0.908738	COC1=CC=C(C=C1)C2=CC(=O)C3=C(O2)C(=C(C=C3OC)OC)OC	C19H18O6	343.117	343.216	2.36965223535735	[M+H]	343.119;313.068;328.094;344.121;285.075	3.80291e+08
Arginine	Amino acid derivatives(氨基酸衍生物)		0.979152	C(CC(C(=O)O)N)CN=C(N)N	C6H14N4O2	175.119	32.6532	0.734613048848714	[M+H]+	175.12;70.064;60.056;116.07;130.098	3.56957e+08
2-(8-hydroxy-4a,8-dimethyl-1,2,3,4,5,6,7,8a-octahydronaphthalen-2-yl)prop-2-enoic acid	terpenoids(萜类)	secoiridoid(裂环环烯醚萜类);artemisane(蒿烷型单萜类);mycrane_monoterpenoids(月桂烷型单萜类);cyclogeraniane(环香叶烷型单萜类)	0.776207	CC1(O)CCCC2(C)CCC(CC12)C(=C)C(O)=O	C15H24O3	235.169	339.847	1.68402568389845	[M-H2O+H]+	235.168;199.149;217.16;159.117;175.148	3.4515e+08
Kaempferide	flavonoids(黄酮类)	Capsella Bursa-Pastoris(荠菜子);Sedum Sarmentosum(石指甲);Sedum Sarmentosum(垂盆草);Caulis Piperis Kadsurae(海风藤);Kaempferia Galanga(山奈);Kadsura Peltigera(长梗南五味子);Alpinia Officinarum(高良姜 (山姜属));Crocus Sativus(藏红花);Crocus Sativus(番红花);Crocus Sativus(西红花);Linaria Dalmatica(达耳马威亚柳穿鱼)	0.9835	COC1=CC=C(C=C1)C2=C(C(=O)C3=C(C=C(C=C3O2)O)O)O	C16H12O6	299.056	253.645	0.513616810428847	[M-H]-	284.032;299.058;136.987;285.035;65.003	3.22703e+08
Nobiletin	flavonoids(黄酮类)	flavones(黄酮类)	0.74241	COC1=C(C=C(C=C1)C2=CC(=O)C3=C(O2)C(=C(C(=C3OC)OC)OC)OC)OC	C21H22O8	403.139	328.99	0.859592833003279	[M+H]	403.141;373.093;327.09;388.112;342.113	3.12117e+08
Kaempferol	flavonoids(黄酮类)	flavones(黄酮类);flavonols(黄酮醇类)	1	C1=CC(=CC=C1C2=C(C(=O)C3=C(C=C(C=C3O2)O)O)O)O	C15H10O6	287.055	168.474	1.63525328812079	[M+H]	287.056;288.057;269.042;123.007;119.05	3.09554e+08
3-Hydroxy-5-isopropylidene-3,8-dimethyl-2,3,3a,4,5,8a-hexahydro-6(1H)-azulenone	terpenoids(萜类)	secoiridoid(裂环环烯醚萜类)	0.863328	CC(C)=C1CC2C(CCC2(C)O)\C(=C/C1=O)C	C15H22O2	235.169	323.593	1.85650405640725	[M+H]+	217.161;235.169;161.097;189.165;119.086	2.92788e+08
p-Hydroxybenzaldehyde	Phenols(酚类)	Phellodendron Japonicum(日本黄柏);Taraxacum Formosanum(台湾蒲公英);Toosendan Fructus(川楝子);Semiaquilegiae Radix(天葵子);Fagopyrum Dibotrys(金荞麦);Ban-Lan-Gen(板蓝根);Phellinus Igniarius(桑黄);Daphne Genkwa(芫花根);Descurainia Sophia(葶苈子);Descurainia Sophia(播娘蒿);Descurainia Sophia(南葶苈子);Alpinia Blepharocalyx(云南草蔻);Equisetum Hyemale(木贼);Portulaca Grandiflora(半枝莲);Portulaca Grandiflora(大花马齿苋);Ligusticum Sinense(藁本);Ligust…	1	C1=CC(=CC=C1C=O)O	C7H6O2	121.03	76.8267	3.7071597068006	[M-H]	121.029;122.033;120.022;92.027;93.035	2.56215e+08
Isopeonol	Phenols(酚类)	Cynanchum Paniculatum(徐长卿 (中药))	0.688396	O=C(C1=CC=C(O)C=C1OC)C	C9H10O3	165.056	45.0117	2.15109216121183	[M-H]-	165.057;59.014;75.008;121.066;93.035	2.4477e+08
Fumaric acid	Organic acids and derivatives(有机酸及其衍生物)	Corydalis Yanhusuo(延胡索);Helianthus Annuus(向日葵叶);Helianthus Annuus(向日葵花);Helianthus Annuus(向日葵籽);Helianthus Annuus(向日葵茎髓);Plantago Major(大车前);Lonicera Fulvotomentosa(黄褐毛忍冬);Malus Domestica(苹果);Malus Domestica(苹果海棠);Urtica Dioica(异株荨麻);Cladonia Fallax Abbayes(金刷把);Sarcandra Glabra(草珊瑚);Pyrrosia Sheareri(庐山石韦);Saccharum(甘蔗);Capsella Bursa-Pastoris(荠菜子);Pisum Sativum(豌豆);Torreya Yunnanensis(云南榧树);Dap…	0.932245	C(=CC(=O)O)C(=O)O	C4H4O4	115.004	33.0707	2.11291412850797	[M-H]	71.013;115.004;46.008;72.017;57.692	2.26281e+08
Citric acid	Carboxylic acids and derivatives(羧酸及其衍生物)	Panax Ginseng(人参芦);Panax Ginseng(人参叶);Panax Ginseng(人参花蕾);Panax Ginseng(人参);Hippophae Rhamnoides(中亚沙棘);Hippophae Rhamnoides(醋柳果);Hippophae Rhamnoides(江孜沙棘);Hippophae Rhamnoides(云南沙棘);Hippophae Rhamnoides(中国沙棘);Hippophae Rhamnoides(沙棘);Urtica Dioica(异株荨麻);Crataegus(山里红);Crataegus(山楂属);Crataegus Scabrifolia(云南山楂);Ephedra Equisetina(木贼麻黄);Citrus Medica(枸橼叶);Crataegus Pinnatifida(山楂叶);Crataegus Pinna…	0.88607	C(C(=O)O)C(CC(=O)O)(C(=O)O)O	C6H8O7	191.02	56.9575	0.466360185020155	[M-H]	111.009;87.009;85.03;191.017;57.034	2.22412e+08
Isoleucine	Amino acid derivatives(氨基酸衍生物)		0.948054	CCC(C)C(C(=O)O)N	C6H13NO2	132.102	35.7424	0.84245711080349	[M+H]+	86.097;132.102;44.05;69.07;87.1	2.16482e+08
Cryptotanshinone	quinones(醌类)	β-naphthoquinones(β-萘醌类)	0.767098	CC1COC2=C1C(=O)C(=O)C1=C2C=CC2=C1CCCC2(C)C	C19H20O3	297.148	537.765	2.3962338059423	[M+H]+	297.148;251.141;279.136;254.092;282.127	2.14217e+08
Moracin G			0.749216	CC1=CCC2=C(OC1)C=CC1=C2OC(=C1)C1=CC(O)=CC(O)=C1	C19H16O4	309.112	422.875	1.02266844608368	[M+H]+	309.115;265.122;223.077;250.098;310.116	2.11752e+08
(S)-Curzeone			1	CC1CCC2=C(C3=C(OC=C3C)C=C2C)C1=O	C15H16O2	229.122	464.527	1.97139100357635	[M+H]+	229.121;230.124;214.1;213.091;201.127	2.11127e+08
Phenylalanine	Amino acid derivatives(氨基酸衍生物)		0.898088	O=C(O)C(N)CC1=CC=CC=C1	C9H11NO2	166.086	36.1145	1.63179356322304	[M+H]+	120.081;166.084;121.084;131.049;103.054	2.01658e+08
FA 18:1+3O		Ephedra Sinica(麻黄根);Ephedra Sinica(麻黄)	0.980419	O=C(O)CCCCCCCC(O)C=CC(O)C(O)CCCCC	C18H34O5	329.233	317.766	1.3610354828468	[M-H]-	329.232;211.133;229.146;330.238;183.139	1.96708e+08
2-(3,4-dihydroxyphenyl)-5,7-dihydroxy-2,3-dihydrochromen-4-one	flavonoids(黄酮类)	dihydrochalcones(二氢查尔酮类);flavanones(二氢黄酮类)	0.895347	Oc1cc(O)c2C(=O)CC(Oc2c1)c3ccc(O)c(O)c3	C15H12O6	289.071	95.2811	0.816965731387693	[M+H]+	289.069;169.013;147.045;187.025;290.075	1.89027e+08
Curcumanolide A	terpenoids(萜类)	secoiridoid(裂环环烯醚萜类)	0.820548	CC1CCC(C(C)=C)C11CC(=C(C)C)C(=O)O1	C15H22O2	235.169	191.552	1.35629832755433	[M+H]+	235.168;111.08;177.126;217.16;175.112	1.85399e+08
3,5,7,8-tetramethoxy-2-(3,4,5-trimethoxyphenyl)chromen-4-one	flavonoids(黄酮类)	flavones(黄酮类);flavonols(黄酮醇类)	0.788795	COC1=CC(=CC(OC)=C1OC)C2=C(OC)C(=O)C3=C(OC)C=C(OC)C(OC)=C3O2	C22H24O9	433.149	418.857	0.232169301167552	[M+H]+	433.146;403.102;418.124;385.091;434.154	1.84919e+08
5-OXO-D-PROLINE	Amino acid derivatives(氨基酸衍生物)	Rehmannia Glutinosa(干地黄);Rehmannia Glutinosa(熟地黄);Rehmannia Glutinosa(生地黄);Rehmannia Glutinosa(紫地黄);Rehmannia Glutinosa(地黄);Rehmannia Glutinosa(鲜地黄(生地));Indigo Naturalis(青黛);Geum Urbanum(香草水杨梅);Ban-Lan-Gen(板蓝根);Lycium Chinese(枸杞);Ceratonia Siliqua(长角豆);Phyllanthus Reticulatus(小果叶下珠);Rheum Maximowiczii(马氏大黄);Pseudostellaria Heterophylla(太子参);Pseudostellaria Heterophylla(异叶假繁缕(太子参));Pseudostellaria…	0.98309	C1CC(=O)NC1C(=O)O	C5H7NO3	128.035	33.9733	2.98733966795004	[M-H]-	128.035;85.03;129.038;84.045;82.03	1.84375e+08
N2-Fructopyranosylarginine			0.73001	NC(=N)NCCCC(NCC1(O)OCC(O)C(O)C1O)C(O)=O	C12H24N4O7	337.172	32.6532	0.414244721161211	[M+H]+	337.176;70.064;175.12;114.103;60.056	1.78334e+08
Adenine	alkaloid(生物碱)	purine alkaloids(嘌呤类生物碱);imidazole alkaloi(咪唑类生物碱)	1	C1=NC2=NC=NC(=C2N1)N	C5H5N5	136.062	32.6532	0.844030485670719	[M+H]	136.063;137.065;119.036;91.054;94.04	1.78244e+08
7-Hydroxy-2-methyl-4-oxo-4H-1-benzopyran-5-carboxylic acid			0.750258	CC1=CC(=O)C2=C(C=C(O)C=C2O1)C(O)=O	C11H8O5	221.044	122.248	3.06248625894864	[M+H]+	159.045;131.049;147.044;175.039;103.054	1.7272e+08
Ginsenoside F1	terpenoids(萜类)	Panax Ginseng(人参芦);Panax Ginseng(人参叶);Panax Ginseng(人参花蕾);Panax Ginseng(人参)	0.883975	CC(C)=CCCC(C)(OC1OC(CO)C(O)C(O)C1O)C1CCC2(C)C1C(O)CC1C3(C)CCC(O)C(C)(C)C3C(O)CC21C	C36H62O9	683.435	333.68	2.28565453648012	[M+HCOO]-	683.437;637.435;683.502;475.383;101.025	1.69861e+08
Sophoricoside	flavonoids(黄酮类)	isoflavones(异黄酮类)	0.716198	C1=CC(=CC=C1C2=COC3=CC(=CC(=C3C2=O)O)O)OC4C(C(C(C(O4)CO)O)O)O	C21H20O10	433.114	106.391	2.26880434562058	[M+H]+	271.062;272.067;85.029;433.11;313.06	1.5999e+08
2,8-Dihydroxy-5,5,8-trimethyl-11-oxatetracyclo[7.3.1.0~1,9~.0~3,7~]tridecan-10-one	terpenoids(萜类)	mycrane_monoterpenoids(月桂烷型单萜类);lavandulane(薰衣草烷型单萜类);artemisane(蒿烷型单萜类);secoiridoid(裂环环烯醚萜类);cyclogeraniane(环香叶烷型单萜类)	1	CC1(C)CC2C(O)C34COC(=O)C3(C4)C(C)(O)C2C1	C15H22O4	267.159	115.621	0.806090000418898	[M+H]+	232.141;268.165;250.15;214.13;186.137	1.5895e+08
Licoricesaponin G2	terpenoids(萜类)	Glycyrrhiza Uralensis(甘草);Glycyrrhiza Uralensis(植物甘草);Glycyrrhiza Uralensis(乌拉尔甘草)	0.979891	O=C(O)C7OC(OC1C(OC(C(=O)O)C(O)C1(O))OC3CCC4(C)(C5C(=O)C=C2C6CC(C(=O)O)(C)CCC6(C)(CCC2(C)C5(C)(CCC4(C3(C)(CO))))))C(O)C(O)C7(O)	C42H62O17	837.387	354.554	5.02428750434567	[M-H]-	837.383;351.054;113.024;838.4;193.036	1.58339e+08
Nicotinic acid	alkaloid(生物碱)	pyridines(吡啶类生物碱)	1	O=C(O)C=1C=NC=CC1	C6H5NO2	124.039	34.8725	3.96480970605457	[M+H]+	124.039;125.042;80.051;96.045;78.033	1.5096e+08
5,7-dihydroxy-3-(4-hydroxyphenyl)-6,8-bis[3,4,5-trihydroxy-6-(hydroxymethyl)oxan-2-yl]chromen-4-one	flavonoids(黄酮类)	isoflavones(异黄酮类)	0.701389	OCC1OC(C(O)C(O)C1O)C2=C(O)C(C3OC(CO)C(O)C(O)C3O)=C4OC=C(C(=O)C4=C2O)C5=CC=C(O)C=C5	C27H30O15	595.165	44.0705	1.82695792024929	[M+H]+	457.119;325.068;337.071;379.083;577.163	1.5026e+08
Formononetin	flavonoids(黄酮类)	Dalbergia Stevensonii(斯特文黄檀);Virola Caducifolia(落花南美肉豆蔻);Bolusanthus Speciosus(非洲树紫藤/非洲紫藤木);Hedysari Radix(红芪)	0.999892	COC1=CC=C(C=C1)C2=COC3=C(C2=O)C=CC(=C3)O	C16H12O4	267.066	308.172	0.97172710545514	[M-H]	267.067;252.042;268.07;223.041;253.044	1.50228e+08
Curzerene			0.971888	CC(=C)C1CC2=C(CC1(C)C=C)OC=C2C	C15H20O	217.159	373.335	1.16262063985629	[M+H]+	217.16;161.097;175.112;119.086;107.085	1.43145e+08
Asparagoside A	terpenoids(萜类);steroidal saponin(甾体皂苷类)	cyclogeraniane(环香叶烷型单萜类);secoiridoid(裂环环烯醚萜类);spirostanols(螺甾烷醇类);iridoid(环戊烷环烯醚萜类);lavandulane(薰衣草烷型单萜类);artemisane(蒿烷型单萜类);isospirostanols(异螺甾烷醇类);mycrane_monoterpenoids(月桂烷型单萜类);menthane_monoterpenoids(薄荷烷型单萜类)	0.875161	CC1C2C(CC3C4CCC5CC(CCC5(C)C4CCC23C)OC2OC(CO)C(O)C(O)C2O)OC11CCC(C)CO1	C33H54O8	579.39	309.541	2.02666546525074	[M+H]+	417.334;273.224;161.132;255.21;85.03	1.38696e+08
(S)-Bilobanone			0.778509	CC(C)CC1=CC(=CO1)C1CC=C(C)C(=O)C1	C15H20O2	233.154	298.785	0.847374029269549	[M+H]+	233.155;215.142;173.133;175.111;187.147	1.37982e+08
SUCCINATE	Organic acids and derivatives(有机酸及其衍生物)	Typha Latifolia(宽叶香蒲);Conyza Blinii(苦蒿);Lobelia Chinensis(半边莲);Osmunda Japonica(紫萁);Citrus Medica(枸橼叶);Changium Smyrnioides(明党参);Crataegus Pinnatifida(山楂叶);Crataegus Pinnatifida(山楂花);Crataegus Pinnatifida(无毛山楂);Sageretia Thea(雀梅藤);Crataegus Scabrifolia(云南山楂);Aloe Vera(芦荟(库拉索芦荟));Angelica Sinensis(当归);Sigesbeckia Glabrescens(毛梗豨莶);Equisetum Hyemale(木贼);Panax Ginseng(人参芦);Panax Ginseng(人参叶);Panax G…	0.961745	C(CC(=O)O)C(=O)O	C4H6O4	117.019	35.9921	3.70888984942583	[M-H]-	73.03;117.02;99.008;59.014;74.033	1.37869e+08
SUCROSE	Carbohydrates and derivatives(糖类及其衍生物)	Fritillaria Cirrhosa(川贝母);Fritillaria Unibracteata(暗紫贝母);Taraxacum Officinale(药用蒲公英);Ban-Lan-Gen(板蓝根);Sterculia Lychnophora(胖大海);Ligusticum Sinense(藁本);Ligusticum Sinense(蒿本);Ligusticum Sinense(茶芎);Astragalus Membranaceus(黄芪);Astragalus Membranaceus(膜荚黄耆);Eleutherococcus Senticosus(刺五加);Saposhnikovia Divaricata(防风);Bolbostemma Paniculatum(假贝母);Bolbostemma Paniculatum(土贝母);Symplocos Caudata(山矾根);B…	0.661586	C(C1C(C(C(C(O1)OC2(C(C(C(O2)CO)O)O)CO)O)O)O)O	C12H22O11	341.109	36.5997	0.00890165891726276	[M-H]-	59.014;89.024;71.015;341.107;179.057	1.35744e+08
1,4,5-Naphthalenetriol			0.955609	OC1=CC=CC2=C(O)C=CC(O)=C12	C10H8O3	177.055	52.526	0.747998067989276	[M+H]+	177.055;145.029;186.055;117.034;149.06	1.34899e+08
6-Hydroxy-5a-methyl-3,9-bis(methylene)decahydronaphtho[1,2-b]furan-2(3H)-one	terpenoids(萜类)	artemisane(蒿烷型单萜类)	0.804691	CC12CCC3C(OC(=O)C3=C)C1C(=C)CCC2O	C15H20O3	231.138	187.292	0.574490082570862	[M-H2O+H]+	231.138;145.101;173.095;213.129;203.142	1.34618e+08
N-cis-Feruloyltyramine			0.823757	COC1=C(O)C=CC(\C=C/C(/O)=N/CCC2=CC=C(O)C=C2)=C1	C18H19NO4	314.139	190.901	1.5401116070517	[M+H]+	177.055;121.065;314.141;145.029;186.054	1.25245e+08
Kaempferol	flavonoids(黄酮类)	Astragalus Mongholicus(蒙古黄芪);Paeonia Suffruticosa(牡丹皮);Rhododendron Micranthum(照山白);Dioscoreaceae(薯蓣科);Brassicaceae(十字花科);Typha Angustata(蒲黄);Agrimonia Pilosa(仙鹤草根);Agrimonia Pilosa(龙芽草);Agrimonia Pilosa(鹤草芽);Agrimonia Pilosa(龙牙草);Nelumbinis Stamen(莲须);Hypericum Japonicum(地耳草);Portulaca Oleracea(马齿苋);Portulaca Oleracea(鲜马齿苋);Phyllanthus Urinaria(叶下珠);Cudrania Tricuspidata(柘树);Hemerocallis Fulva(萱…	1	OC1=CC=C(C=C1)C1=C(O)C(=O)C2=C(O)C=C(O)C=C2O1	C15H10O6	285.04	167.343	0.60517005121237	[M-H]-	285.041;286.043;117.035;239.034;166.999	1.22852e+08
1,2-Dehydro-alpha-cyperone			0.830931	CC(=C)C1CCC2(C)C=CC(=O)C(C)=C2C1	C15H20O	217.158	312.053	2.31458831728233	[M+H]+	217.16;69.07;199.149;161.097;133.101	1.18078e+08
Scutellarein	flavonoids(黄酮类)	flavones(黄酮类)	1	C1=CC(=CC=C1C2=CC(=O)C3=C(O2)C=C(C(=C3O)O)O)O	C15H10O6	287.056	116.77	2.00812781319945	[M+H]	287.056;288.057;185.008;269.048;123.007	1.15522e+08
Benzoic acid	Phenols(酚类)		1	O=C(O)C=1C=CC=CC1	C7H6O2	123.044	72.6021	3.48148473402286	[M+H]+	123.043;124.039;95.049;81.07;67.054	1.11326e+08
Galangin	flavonoids(黄酮类)	Alpinia Galanga(大良姜);Saxifragaceae(虎耳草科);Aster Novi-Belgii(紫菀);Alnus Pendula(垂桤木);Scutellaria Galericulata(并头草);Scutellaria Galericulata(盔状黄芩);Plantago Major(大车前);Escallonia(艾斯卡罗属);Propolis(蜂胶);Alpinia Officinarum(高良姜 (山姜属));Apis Mellifera Ligustica(意大利蜂)	0.999727	C1=CC=C(C=C1)C2=C(C(=O)C3=C(C=C(C=C3O2)O)O)O	C15H10O5	269.045	245.778	1.14668003948547	[M-H]	269.048;151.003;117.035;270.047;149.025	1.09906e+08
2'-Hydroxyacetophenone			0.995571	CC(=O)C1=CC=CC=C1O	C8H8O2	137.06	91.5423	1.75919547035438	[M+H]+	43.018;137.059;81.07;138.064;95.086	1.04234e+08
Hydroxyferulic acid	phenylpropanoids(苯丙素类)	Artemisiae Scopariae(茵陈)	0.769011	O=C(O)C=CC1=CC(O)=C(O)C(OC)=C1	C10H10O5	209.046	45.0117	2.57491866341683	[M-H]-	165.056;59.014;85.03;121.066;209.029	1.02546e+08
Benzenepropanamide, N-[2-(acetyloxy)-1-(phenylmethyl)ethyl]-alpha-(benzoylamino)-			0.766181	CC(=O)OCC(CC1=CC=CC=C1)NC(=O)C(CC2=CC=CC=C2)NC(=O)C3=CC=CC=C3	C27H28N2O4	445.213	443.392	0.62203264339768	[M+H]+	105.034;194.117;224.108;117.069;134.097	1.02324e+08
Tectochrysin	flavonoids(黄酮类)	flavones(黄酮类)	0.997039	COC1=CC(=C2C(=C1)OC(=CC2=O)C3=CC=CC=C3)O	C16H12O4	269.081	193.689	1.56646037171818	[M+H]	269.079;254.058;213.092;270.084;237.054	9.8855e+07
Luteolin	flavonoids(黄酮类)	Chinese Sorghum(高粱);Microtoena Prainiana(南川冠唇花);Euphorbia Veneta(大戟科属)	0.999999	C1=CC(=C(C=C1C2=CC(=O)C3=C(C=C(C=C3O2)O)O)O)O	C15H10O6	285.04	178.905	0.443113527901018	[M-H]	285.041;213.054;286.043;241.053;117.035	9.8565e+07
Histamine	alkaloid(生物碱)	imidazole alkaloi(咪唑类生物碱)	0.808186	c1c([nH]cn1)CCN	C5H9N3	112.087	33.1132	0.552958824220504	[M+H]+	112.087;70.064;95.06;113.035;96.045	9.76211e+07
Aconitic Acid	Organic acids and derivatives(有机酸及其衍生物)	Equisetum Palustre(骨节草);Equisetum Palustre(犬问荆);Glycine Max(酱);Glycine Max(大豆);Glycine Max(豆油);Glycine Max(毛豆);Glycine Max(黑大豆);Artemisia Rupetris(一支蒿);Saccharum Officinarum(药用甘蔗);Saccharum Officinarum(秀贵甘蔗);Saccharum(甘蔗);Aconitum Napellus(欧乌头);Arthraxon Hispidus(荩草);Scurrura Atropurpurea(黑大豆叶)	0.606422	O=C(O)C=C(C(=O)O)CC(=O)O	C6H6O6	173.009	39.4931	0.903301642371326	[M-H]-	111.009;85.03;129.02;67.02;57.034	9.45249e+07
Kaempferol-3-O-glucuronoside	flavonoids(黄酮类)	Vicia Faba(蚕豆);Vicia Faba(蚕豆壳);Vicia Faba(蚕豆叶);Vicia Faba(马蚕豆);Euphorbia Esula(鸡肠狼毒);Euphorbia Esula(细叶大戟);Euphorbia Esula(乳浆大戟)	1	OC1C(O)C(OC2=C(OC3=CC(O)=CC(O)=C3C2=O)C2=CC=C(O)C=C2)OC(C1O)C(O)=O	C21H18O12	461.072	123.427	0.762760497883218	[M-H]-	287.056;463.082;285.04;286.042;166.997	9.40034e+07
Curcumenone			0.788709	CC(=O)CCC1C2CC(=C(C)C)C(=O)CC12C	C15H22O2	235.169	371.664	1.26312254502464	[M+H]+	235.168;217.16;175.147;119.086;133.101	9.34524e+07
Dihydrotanshinone I	quinones(醌类)	β-naphthoquinones(β-萘醌类);o_phenanthraquinones(对菲醌类)	0.604033	CC1COC2=C1C(=O)C(=O)C3=C2C=CC4=C(C=CC=C43)C	C18H14O3	279.102	459.244	0.653879104090873	[M+H]	279.102;261.09;233.095;205.103;169.065	9.19916e+07
Biochanin-7-O-glucoside	flavonoids(黄酮类)	Cicer Arietinum(回回豆);Cicer Arietinum(鹰嘴豆)	0.940285	COC1=CC=C(C=C1)C1=COC2=CC(OC3OC(CO)C(O)C(O)C3O)=CC(O)=C2C1=O	C22H22O10	491.119	96.5231	0.809782374390436	[M+HCOO]-	283.063;268.039;284.067;269.043;311.057	9.16119e+07
Prunetin	flavonoids(黄酮类)	isoflavones(异黄酮类)	0.897967	COC1=CC(=C2C(=C1)OC=C(C2=O)C3=CC=C(C=C3)O)O	C16H12O5	285.076	225.853	0.112600627139034	[M+H]	285.075;270.052;249.146;191.107;253.049	9.0121e+07
Pyroglutamic acid (not validated, isomer of 88)	Amino acid derivatives(氨基酸衍生物)		0.946019	O=C(O)C1NC(=O)CC1	C5H7NO3	130.05	36.5393	0.481652086156804	[M+H]+	84.044;130.05;70.066;112.087;71.048	8.85107e+07
Piperalol	terpenoids(萜类)	secoiridoid(裂环环烯醚萜类);mycrane_monoterpenoids(月桂烷型单萜类);lavandulane(薰衣草烷型单萜类);artemisane(蒿烷型单萜类)	0.704535	CC1C=C(C=O)C(CO)C(O)C2CC(C)(C)CC12	C15H24O3	253.18	184.244	0.802121269069612	[M+H]+	235.168;253.18;177.129;217.16;133.101	8.70271e+07
Flavanone base +2O, 1MeO	flavonoids(黄酮类)	flavanones(二氢黄酮类);dihydrochalcones(二氢查尔酮类)	0.745703	O=C2C3=C(O)C=C(OC)C=C3(OC(C1=CC=C(O)C=C1)C2)	C16H14O5	287.091	225.005	0.356531463822406	[M+H]+	287.091;153.018;161.06;171.03;133.064	8.47638e+07
5,7-dihydroxy-2-(4-hydroxyphenyl)-6,8-bis[3,4,5-trihydroxy-6-(hydroxymethyl)oxan-2-yl]chromen-4-one	flavonoids(黄酮类)	Tragopogon(婆罗门参属);Citrus Limon(柠檬叶);Citrus Limon(柠檬皮);Citrus Limon(柠檬根);Perilla Frutescens Var. Arguta(紫苏梗);Perilla Frutescens Var. Arguta(紫苏叶);Glycyrrhiza Kansuensis(黄甘草);Triticum Aestivum(小麦);Vitex Lucens(新西兰牡荆);Glycyrrhiza Uralensis(甘草);Glycyrrhiza Uralensis(植物甘草);Glycyrrhiza Uralensis(乌拉尔甘草)	0.971317	OCC1OC(C(O)C(O)C1O)C2=C(O)C(C3OC(CO)C(O)C(O)C3O)=C4OC(=CC(=O)C4=C2O)C5=CC=C(O)C=C5	C27H30O15	593.151	44.1242	0.610764264484686	[M-H]-	593.144;353.068;383.077;473.114;65.907	8.24597e+07
trans-4-Coumaric acid	phenylpropanoids(苯丙素类)	Cuscuta Australis(南方菟丝子);Fritillaria Cirrhosa(川贝母);Allium Macrostemon(薤白);Cirsium Japonicum(大蓟);Ephedra Equisetina(木贼麻黄);Crataegus Pinnatifida(山楂叶);Crataegus Pinnatifida(山楂花);Crataegus Pinnatifida(无毛山楂);Solanum Tuberosum(马铃薯);Eucalyptus Maculata(斑纹桉);Oroxylum Indicum(木蝴蝶树皮);Cucumis Sativus(黄瓜);Cucumis Sativus(苦黄瓜);Astragalus Membranaceus(黄芪);Astragalus Membranaceus(膜荚黄耆);Commelina Communis(鸭跖草);S…	1	OC(=O)C=CC1=CC=C(O)C=C1	C9H8O3	163.04	83.6515	0.0504935072056581	[M-H]-	120.054;164.043;119.051;121.029;165.019	8.22741e+07
Methyl 4-hydroxycinnamate	phenylpropanoids(苯丙素类)	Nelumbo Nucifera(藕);Nelumbo Nucifera(莲子);Nelumbo Nucifera(荷叶);Nelumbo Nucifera(莲子心);Nelumbo Nucifera(莲);Nelumbo Nucifera(荷);Nelumbo Nucifera(荷叶蒂);Corydalis Ambigua(东北延胡索);Notholirion Bulbuliferum(假百合)	0.945811	COC(=O)C=CC1=CC=C(C=C1)O	C10H10O3	177.056	99.205	1.67893539946746	[M-H]	177.055;135.046;134.038;162.033;178.061	7.91149e+07
Salicylic acid	Phenols(酚类)	Cyperus Rotundus(香附);Gentiana Scabra(粗糙龙胆);Gentiana Scabra(龙胆);Menispermum Dauricum(蝙蝠葛根);Illicium Verum(八角茴香);Illicium Verum(八角);Citrus Aurantium(酸橙);Citrus Aurantium(枳壳);Citrus Aurantium(苦橙);Citrus Aurantium(玳玳花);Citrus Aurantium(枳实);Citrus Aurantium(仙客来);Gaultheria Yunnanensis(滇白珠树);Plantago Major(大车前);Panax Ginseng(人参芦);Panax Ginseng(人参叶);Panax Ginseng(人参花蕾);Panax Ginseng(人参);Coriandrum Sativ…	0.979304	C1=CC=C(C(=C1)C(=O)O)O	C7H6O3	137.024	155.294	2.93177956578813	[M-H]-	93.035;137.024;94.038;138.03;65.04	7.79133e+07
4-Methyl-6,7-dihydroxycoumarin	phenylpropanoids(苯丙素类)	coumarins(香豆素类)	0.807044	CC1=CC(=O)OC2=CC(=C(C=C12)O)O	C10H8O4	193.05	122.248	0.743669276249881	[M+H]	193.05;131.049;147.044;103.054;149.06	7.67994e+07
Berberine	alkaloid(生物碱)	pyridines(吡啶类生物碱);isoquinolines(异喹啉类生物碱)	0.695922	COC1=C(C2=C[N+]3=C(C=C2C=C1)C4=CC5=C(C=C4CC3)OCO5)OC	C20H18NO4+	336.123	225.853	0.0635086074322147	[M+]	336.123;321.101;320.094;292.096;306.077	7.32928e+07
Flavonol base + 3O, O-Hex	flavonoids(黄酮类)	Photinia Lactiflora(毛花石楠)	0.960048	O=C2C(OC1OC(CO)C(O)C(O)C1(O))=C(OC3=CC(O)=CC(O)=C23)C4=CC=C(O)C=C4	C21H20O11	447.094	116.14	0.0753886419598637	[M-H]-	447.092;285.04;284.032;448.093;286.043	7.20476e+07
(6beta,8alpha)-6-Hydroxy-7(11)-eremophilen-12,8-olide	terpenoids(萜类)	secoiridoid(裂环环烯醚萜类)	0.719359	CC1CCCC2CC3OC(=O)C(C)=C3C(O)C12C	C15H22O3	251.164	299.752	0.164074414509691	[M+H]+	251.165;233.155;191.142;147.118;123.081	7.15188e+07
5-hydroxy-2-(3-hydroxy-4-methoxyphenyl)-7-[3,4,5-trihydroxy-6-[(3,4,5-trihydroxy-6-methyloxan-2-yl)oxymethyl]oxan-2-yl]oxychromen-4-one	flavonoids(黄酮类)	flavones(黄酮类)	0.624027	COc1ccc(cc1O)c2cc(=O)c3c(O)cc(OC4OC(COC5OC(C)C(O)C(O)C5O)C(O)C(O)C4O)cc3o2	C28H26O15	609.18	147.476	1.12346296086894	[M+H]+	301.073;463.127;286.048;302.073;71.049	7.11597e+07
Flavone base + 3O, C-Hex-dHex	flavonoids(黄酮类)	Crataegus Pinnatifida(山楂叶);Crataegus Pinnatifida(山楂花);Crataegus Pinnatifida(无毛山楂)	0.883253	O=C1C=C(OC2=C1C(O)=CC(O)=C2C4OC(CO)C(O)C(O)C4(OC3OC(C)C(O)C(O)C3(O)))C5=CC=C(O)C=C5	C27H30O14	577.156	84.7964	0.849090932229072	[M-H]-	577.153;383.078;353.069;457.111;64.13	7.10604e+07
Curcumenol	terpenoids(萜类)	secoiridoid(裂环环烯醚萜类)	1	OC12OC3(CC1=C(C)C)C(C(=C2)C)CCC3C	C15H22O2	235.169	226.86	1.76338555559607	[M+H]+	176.151;236.172;194.163;218.163;136.12	7.0447e+07
4-Nitrophenol	Phenols(酚类)		0.87403	Oc(c1)ccc(c1)[N+1]([O-1])=O	C6H5NO3	140.034	53.7071	3.29075980524194	[M+H]+	140.035;112.039;122.06;141.053;111.044	6.82204e+07
5,7-dihydroxy-2-(4-hydroxyphenyl)-8-[3,4,5-trihydroxy-6-(hydroxymethyl)oxan-2-yl]-6-(3,4,5-trihydroxyoxan-2-yl)chromen-4-one	flavonoids(黄酮类)	flavones(黄酮类)	0.676773	O=C1C=C(OC2=C1C(O)=C(C(O)=C2C3OC(CO)C(O)C(O)C3O)C4OCC(O)C(O)C4O)C=5C=CC(O)=CC5	C26H28O14	565.157	55.2377	0.956243787979033	[M+H]+	379.079;547.146;325.071;529.133;337.068	6.70397e+07
(4Z,7Z)-5,9,9-Trimethyl-11-oxabicyclo[8.2.1]trideca-1(13),4,7-triene-6,12-dione			0.936839	C\C1=C\CC\C2=C/C(OC2=O)C(C)(C)\C=C/C1=O	C15H18O3	247.133	348.56	0.430538474505333	[M+H]+	219.137;247.133;173.133;201.128;109.101	6.69205e+07
Methoxyeugenol			0.777378	COC1=CC(CC=C)=CC(OC)=C1O	C11H14O3	195.102	187.292	2.28815875018631	[M+H]+	154.062;163.077;195.101;107.049;135.081	6.53158e+07
Curzerenone			1	CC(=C)C1C(=O)C2=C(CC1(C)C=C)OC=C2C	C15H18O2	231.138	408.617	1.62284422610061	[M+H]+	231.138;163.074;69.07;175.075;185.132	6.48707e+07
Naringenin	flavonoids(黄酮类)	dihydrochalcones(二氢查尔酮类);flavanones(二氢黄酮类)	0.985764	C1C(OC2=CC(=CC(=C2C1=O)O)O)C3=CC=C(C=C3)O	C15H12O5	273.076	91.0223	1.70928170850925	[M+H]+	273.077;153.018;147.045;119.05;171.03	6.25813e+07
D-Gluconic acid	Organic acids and derivatives(有机酸及其衍生物)	Sinapis Alba(白芥子);Sinapis Semen(芥子);Nigella Damascena(黑种草);Brassica Juncea(芥菜);Brassica Juncea(雪菜);Melia Azedarach(苦楝实);Melia Azedarach(楝);Melia Azedarach(楝花);Melia Azedarach(苦楝);Nelumbo Nucifera(藕);Nelumbo Nucifera(莲子);Nelumbo Nucifera(荷叶);Nelumbo Nucifera(莲子心);Nelumbo Nucifera(莲);Nelumbo Nucifera(荷);Nelumbo Nucifera(荷叶蒂);Nasturtium Officinale(豆瓣菜)	0.947974	OCC(O)C(O)C(O)C(O)C(O)=O	C6H12O7	195.051	32.6777	1.3764932225693	[M-H]-	195.052;75.009;129.019;59.013;99.009	6.07902e+07
3,8a-Dihydroxy-5-isopropylidene-3,8-dimethyl-2,3,3a,4,5,8a-hexahydro-6(1H)-azulenone	terpenoids(萜类)	secoiridoid(裂环环烯醚萜类)	0.873091	CC(C)=C1CC2C(C)(O)CCC2(O)\C(=C/C1=O)C	C15H22O3	233.154	154.018	1.67571050328149	[M-H2O+H]+	233.155;175.112;215.142;173.134;145.101	5.73933e+07
Icaritin	flavonoids(黄酮类)	Epimedium Koreanum(朝鲜淫羊藿);Epimedium Wanshanense(万山淫羊藿);Anemarrhenae Rhizoma(知母);Pharbitis Nil(牵牛子);Epimedium Sagittatum(淫羊藿);Epimedium Sagittatum(箭叶淫羊藿);Herba Sarcandrae(肿节风);Epimedium Acuminatum(粗毛淫羊藿)	0.9373	CC(=CCC1=C2C(=C(C=C1O)O)C(=O)C(=C(O2)C3=CC=C(C=C3)OC)O)C	C21H20O6	367.119	403.78	1.66903047612206	[M-H]	367.12;309.038;297.038;284.032;368.118	5.68194e+07
5,8-Dihydroxy-3,5,8-trimethyl-4a,5,6,7,7a,8,9,9a-octahydroazuleno[6,5-b]furan-2(4H)-one	terpenoids(萜类)	secoiridoid(裂环环烯醚萜类);mycrane_monoterpenoids(月桂烷型单萜类);iridoid(环戊烷环烯醚萜类)	0.742684	CC\1=C2/CC3C(CCC3(C)O)C(C)(O)CC2OC1=O	C15H22O4	267.159	139.089	1.17632949044517	[M+H]+	231.137;249.151;267.16;145.101;189.127	5.62792e+07
N-trans-Feruloyl-4-O-methyldopamine			0.695371	COC1=CC(\C=C\C(=O)NCCC2=CC(O)=C(OC)C=C2)=CC=C1O	C19H21NO5	344.15	324.636	2.16671833522762	[M+H]+	344.152;228.138;326.14;280.135;254.155	5.59327e+07
Kaempferol-3-O-glucuronoside	flavonoids(黄酮类)	flavonols(黄酮醇类);flavones(黄酮类)	0.763359	OC1C(O)C(OC2=C(OC3=CC(O)=CC(O)=C3C2=O)C2=CC=C(O)C=C2)OC(C1O)C(O)=O	C21H18O12	463.086	138.585	3.28492019452375	[M+H]+	287.056;463.092;288.057;301.074;51.456	5.48618e+07
Lysionotin	flavonoids(黄酮类)	flavones(黄酮类)	0.830059	COC1=CC=C(C=C1)C2=CC(=O)C3=C(C(=C(C(=C3O2)OC)O)OC)O	C18H16O7	345.097	337.808	0.96893126263171	[M+H]	345.096;312.066;284.066;330.072;346.099	5.32867e+07
Parthenolide	terpenoids(萜类)	Sesquiterpenoids(倍半萜类)	0.954888	CC1=CCCC2(C(O2)C3C(CC1)C(=C)C(=O)O3)C	C15H20O3	249.149	187.778	1.56114529145508	[M+H]	231.138;145.101;249.146;173.095;203.143	5.25366e+07
6-[3-[(3,4-dimethoxyphenyl)methyl]-4-methoxy-2-(methoxymethyl)butyl]-4-methoxy-1,3-benzodioxole	phenylpropanoids(苯丙素类)	lignans(木脂素类)	0.728864	COCC(CC1=CC=C(OC)C(OC)=C1)C(COC)CC2=CC3=C(OCO3)C(OC)=C2	C24H32O7	415.212	491.448	0.380324214937941	[M-H2O+H]+	119.086;120.089;121.092;91.054;417.264	5.23952e+07
Azuleno[5,6-c]furan-1(3H)-one, 4,4a,5,6,7,7a,8,9-octahydro-4,8-dihydroxy-6,6,8-trimethyl-	terpenoids(萜类)	secoiridoid(裂环环烯醚萜类);mycrane_monoterpenoids(月桂烷型单萜类);lavandulane(薰衣草烷型单萜类);artemisane(蒿烷型单萜类)	0.905584	CC1(C)CC2C(O)C/3=C(CC(C)(O)C2C1)/C(=O)OC3	C15H22O4	249.149	280.351	2.05644419130605	[M-H2O+H]+	249.15;231.137;185.131;203.142;213.129	5.21661e+07
4-[(E)-3-[1-carboxy-2-(3,4-dihydroxyphenyl)ethoxy]-3-oxoprop-1-enyl]-2-(3,4-dihydroxyphenyl)-7-hydroxy-2,3-dihydro-1-benzofuran-3-carboxylic acid	phenylpropanoids(苯丙素类)	Rubus Idaeus(覆盆子);Rubus Idaeus(丹参)	0.767122	O=C(OC(C(=O)O)CC1=CC=C(O)C(O)=C1)C=CC2=CC=C(O)C=3OC(C4=CC=C(O)C(O)=C4)C(C(=O)O)C23	C27H22O12	537.103	172.244	1.63318018798042	[M-H]-	295.062;185.025;109.029;135.044;197.046	5.18695e+07
Betaine	alkaloid(生物碱)		0.999608	[O-1]C(=O)C[N+1](C)(C)C	C5H11NO2	118.086	394.528	2.2213834433716	[M+H]+	118.086;59.073;119.09;58.066;72.081	5.08036e+07
1alpha-Hydroxyarbusculin A	terpenoids(萜类)	cyclogeraniane(环香叶烷型单萜类);mycrane_monoterpenoids(月桂烷型单萜类);artemisane(蒿烷型单萜类);secoiridoid(裂环环烯醚萜类)	0.784114	CC1(O)CCC(O)C2(C)CCC3C(OC(=O)C3=C)C12	C15H22O4	267.159	128.459	1.38012045686562	[M+H]+	249.147;231.138;267.16;191.107;145.101	5.07147e+07
4-Hydroxybenzoylcholine	alkaloid(生物碱)		0.803658	C[N+](C)(C)CCOC(=O)C1=CC=C(C=C1)O	C12H18NO3	224.128	347.186	2.20828542197693	[M]+	224.129;93.07;165.055;121.065;58.065	5.04363e+07
Isoliquiritigenin	flavonoids(黄酮类)	Panicum Miliaceum(黍米)	0.989618	C1=CC(=CC=C1C=CC(=O)C2=C(C=C(C=C2)O)O)O	C15H12O4	255.066	289.408	1.14686457042173	[M-H]	119.051;255.067;135.009;153.02;91.019	4.93181e+07
Gibberellin A120	terpenoids(萜类)	mycrane_monoterpenoids(月桂烷型单萜类);menthane_monoterpenoids(薄荷烷型单萜类);iridoid(环戊烷环烯醚萜类);lavandulane(薰衣草烷型单萜类);artemisane(蒿烷型单萜类);secoiridoid(裂环环烯醚萜类)	0.749529	CC12CC=CC3(OC1=O)C1CCC4CC1(CC4=C)C(C23)C(O)=O	C19H22O4	315.159	496.347	0.63790681917957	[M+H]+	297.148;315.16;279.141;251.141;254.096	4.85801e+07
7-Methoxycoumarin	phenylpropanoids(苯丙素类)	coumarins(香豆素类)	0.944552	COC1=CC2=C(C=C1)C=CC(=O)O2	C10H8O3	177.055	191.455	1.94959991514725	[M+H]	177.055;149.06;163.039;186.055;117.034	4.8064e+07
Glutamylphenylalanine	Carboxylic acids and derivatives(羧酸及其衍生物)	Blighia Sapida(西非荔枝果);Lotus Corniculatus(地羊鹊);Lotus Corniculatus(百脉根)	0.953989	O=C(O)C(N)CCC(=O)NC(C(=O)O)CC1=CC=CC=C1	C14H18N2O5	293.124	49.456	0.574859089972536	[M-H]-	293.125;59.014;131.072;89.024;71.013	4.79891e+07
Naringenin	flavonoids(黄酮类)	Citrus Reticulata(橘);Citrus Reticulata(南陈);Viscum Angulatum(柿寄生);Viscum Angulatum(棱核槲寄生);Helichrysum Arenarium(沙生蜡菊);Sophora Flavescens(苦参);Hovenia Dulcis(枳椇根);Hovenia Dulcis(枳椇子);Hovenia Dulcis(枳椇);Hovenia Dulcis(北枳椇);Euphorbia Esula(鸡肠狼毒);Euphorbia Esula(细叶大戟);Euphorbia Esula(乳浆大戟);Euphorbia Helioscopia(泽漆);Hedysari Radix(红芪);Daphne Genkwa(芫花根);Prunus Persica(桃);Prunus Persica(桃茎白皮);Prunus Pers…	0.942432	C1C(OC2=CC(=CC(=C2C1=O)O)O)C3=CC=C(C=C3)O	C15H12O5	271.061	242.345	0.888366593176916	[M-H]	271.062;151.003;119.051;107.014;93.035	4.7462e+07
Methylnissolin-3-O-glucoside	flavonoids(黄酮类)		0.733733	COC1=C(C2=C(C=C1)C3COC4=C(C3O2)C=CC(=C4)OC5C(C(C(C(O5)CO)O)O)O)OC	C23H26O10	463.161	213.006	2.69900066510788	[M+H]	167.069;301.105;287.056;152.046;191.072	4.71087e+07
Ginsenoside Rg2	terpenoids(萜类)	Panax Pseudo-Ginseng(假人参)	0.706821	CC1OC(OC2C(O)C(O)C(CO)OC2OC2CC3(C)C(CC(O)C4C(CCC34C)C(C)(O)CCC=C(C)C)C3(C)CCC(O)C(C)(C)C23)C(O)C(O)C1O	C42H72O13	829.493	323.395	2.25935920933652	[M+HCOO]-	783.484;783.511;475.383;101.024;784.513	4.64315e+07
Allyl benzoate			0.97451	C=CCOC(=O)C1=CC=CC=C1	C10H10O2	163.075	575.882	3.04709383965461	[M+H]+	105.034;163.077;106.036;164.08;95.049	4.58264e+07
Isomeranzin	phenylpropanoids(苯丙素类)	coumarins(香豆素类)	0.925404	CC(C)C(=O)CC1=C(C=CC2=C1OC(=O)C=C2)OC	C15H16O4	261.112	323.025	0.341616300639084	[M+H]	189.055;131.049;243.101;261.115;159.045	4.57753e+07
3-(2-Hydroxy-3,4-dimethoxyphenyl)-7-chromanol	flavonoids(黄酮类)		0.804269	COC1=CC=C(C2COC3=CC(=CC=C3C2)O)C(=C1OC)O	C17H18O5	303.123	226.353	1.31399814720876	[M+H]+	123.044;167.069;133.064;161.06;193.086	4.52374e+07
Chalcone base + 3O, 1Prenyl	flavonoids(黄酮类)	chalcones(查尔酮类)	1	O=C(C=CC1=CC=C(O)C=C1)C=2C=CC(O)=C(C=2(O))CC=C(C)C	C20H20O4	325.141	353.639	0.952678259960326	[M+H]+	325.139;326.148;86.097;279.218;152.115	4.44422e+07
Vanillin	Phenols(酚类)		0.907873	COC1=C(C=CC(=C1)C=O)O	C8H8O3	153.055	93.1857	1.22053998905678	[M+H]	153.054;125.06;111.045;134.061;65.038	4.32271e+07
Gentisic acid	Xanthones(山酮类)	Hypericum Perforatum(贯叶连翘);Hypericum Perforatum(贯叶金丝桃);Hypericum Perforatum(贯​​叶连翘);Gentianaceae(龙胆科);Plantago Asiatica(车前);Plantago Asiatica(植物车前);Plantago Asiatica(车前草);Raphanus Sativus(莱菔);Raphanus Sativus(萝卜);Citrus Cultivars(栽培柑桔);Ilex Chinensis(四季青);Foeniculum Vulgare(茴香茎叶);Foeniculum Vulgare(小茴香);Foeniculum Vulgare(茴香根);Plantago Major(大车前);Calendula Officinalis(金盏菊);Phragmites Communis(芦根)…	0.892681	C1=CC(=C(C=C1O)C(=O)O)O	C7H6O4	153.019	41.1283	3.75857621029415	[M-H]	109.029;153.02;66.035;135.044;123.046	4.32112e+07
Inositol		Papaveris Pericarpium(罂粟壳);Arisaema Consanguineum(天南星);Trollius Chinensis(金莲花);Thlaspi Arvense(菥冥子);Thlaspi Arvense(败酱草);Thlaspi Arvense(菥蓂);Geranium Wilfordii(老鹳草);Maydis Seigma(玉米须);Morus Alba(桑白皮);Morus Alba(桑叶);Morus Alba(白桑);Morus Alba(桑实);Radix Aconiti Kusnezoffii(草乌);Clematis Intricata Bunge(铁线透骨草);Cocculus Orbiculatus(木防己);Coriolus Versicolor(云芝);Centella Asiatica(积雪草);Centella Asiatica(崩…	0.822731	OC1C(O)C(O)C(O)C(O)C1O	C6H12O6	179.056	32.6777	1.54525558727412	[M-H]-	59.014;179.057;73.03;89.024;161.045	4.26252e+07
Salvianolic acid G	phenylpropanoids(苯丙素类)	penyipropionic acid(苯丙酸类)	0.612508	OC(=O)CC1=C(O)C(O)=CC=C1\C=C\C(=O)OC(CC1=CC=C(O)C(O)=C1)C(O)=O	C20H18O10	419.097	122.248	1.91326977019545	[M+H]+	221.046;177.055;159.045;147.044;131.049	4.23751e+07
Umbelliferone	phenylpropanoids(苯丙素类)	coumarins(香豆素类)	0.960181	O=C(C=2)Oc(c1)c(C2)ccc(O)1	C9H6O3	163.039	130.54	1.01371158715906	[M+H]+	163.039;135.043;117.034;186.055;145.027	4.21269e+07
Icaritin	flavonoids(黄酮类)	flavonols(黄酮醇类);flavones(黄酮类)	0.896435	CC(=CCC1=C2C(=C(C=C1O)O)C(=O)C(=C(O2)C3=CC=C(C=C3)OC)O)C	C21H20O6	369.133	403.784	0.583670206386531	[M+H]	369.136;313.068;285.075;370.135;270.052	4.16862e+07
(S)-gamma-Calacorene			0.742393	CC(C)C1=CCC(C)C2=C1C=C(C)C=C2	C15H20	201.164	283.842	0.289709554761322	[M+H]+	201.165;145.101;159.117;131.085;173.133	4.16179e+07
alpha-Solamarine	alkaloid(生物碱);terpenoids(萜类)	cyclogeraniane(环香叶烷型单萜类);piperidines(哌啶类生物碱);iridoid(环戊烷环烯醚萜类);lavandulane(薰衣草烷型单萜类);artemisane(蒿烷型单萜类);mycrane_monoterpenoids(月桂烷型单萜类);menthane_monoterpenoids(薄荷烷型单萜类);secoiridoid(裂环环烯醚萜类)	0.966107	CC1C2C(CC3C4CC=C5CC(CCC5(C)C4CCC23C)OC2OC(CO)C(O)C(OC3OC(CO)C(O)C(O)C3OC3OC(C)C(O)C(O)C3O)C2O)OC11CCC(C)CN1	C45H73NO16	884.5	215.166	1.88066166082131	[M+H]+	884.512;884.48;866.504;885.523;866.473	4.08319e+07
Galangin	flavonoids(黄酮类)	flavones(黄酮类);flavonols(黄酮醇类)	1	C1=CC=C(C=C1)C2=C(C(=O)C3=C(C=C(C=C3O2)O)O)O	C15H10O5	271.06	186.79	1.12540736106473	[M+H]	271.062;272.062;253.047;95.086;133.101	4.06497e+07
(R)-Pterosin B			0.687111	CC1CC2=C(C1=O)C(C)=C(CCO)C(C)=C2	C14H18O2	219.138	228.368	0.872672220748878	[M+H]+	219.137;159.117;201.165;133.101;145.101	3.83432e+07
blennin C	terpenoids(萜类)	artemisane(蒿烷型单萜类)	0.817354	CC(CC1=C(CO)COC1=O)C1=CCC(C)(C)C1	C15H22O3	251.164	310.303	0.27186881264682	[M+H]+	233.154;251.164;205.159;215.142;133.101	3.80162e+07
Lucernol	phenylpropanoids(苯丙素类)	coumarins(香豆素类)	0.759918	OC1=CC2=C(C=C1)C1=C(O2)C2=C(OC1=O)C=C(O)C(O)=C2	C15H8O6	285.04	179.068	3.77217210306896	[M+H]+	267.066;285.04;257.044;139.002;239.07	3.74545e+07
Zedoarol	terpenoids(萜类)	secoiridoid(裂环环烯醚萜类)	0.999834	CC1CCC2C(=C)CC3=C(C(C)=CO3)C(=O)C12O	C15H18O3	247.133	308.83	0.596809195947593	[M+H]+	247.133;229.122;201.127;139.04;183.116	3.73323e+07
Anisic aldehyde	Phenols(酚类)		0.970838	COC1=CC=C(C=C1)C=O	C8H8O2	137.06	109.678	1.81285464359311	[M+H]	137.059;43.018;81.07;95.086;138.053	3.71663e+07
Diffractic acid	Phenols(酚类)	Illicium Difengpi(地枫皮);Usnea Diffracta(环节松萝);Usnea Longissima(松萝)	0.976844	CC1=CC(=C(C(=C1C(=O)O)O)C)OC(=O)C2=C(C(=C(C=C2C)OC)C)OC	C20H22O7	373.129	301.558	0.105196246141801	[M-H]	373.13;355.117;374.135;204.042;329.14	3.7117e+07
5,7-dihydroxy-2-(4-hydroxyphenyl)-8-[3,4,5-trihydroxy-6-(hydroxymethyl)oxan-2-yl]-6-(3,4,5-trihydroxyoxan-2-yl)chromen-4-one	flavonoids(黄酮类)	Arisaema Consanguineum(天南星);Glycyrrhiza Uralensis(甘草);Glycyrrhiza Uralensis(植物甘草);Glycyrrhiza Uralensis(乌拉尔甘草);Artemisia Apiacea(青蒿)	0.808144	O=C1C=C(OC2=C1C(O)=C(C(O)=C2C3OC(CO)C(O)C(O)C3O)C4OCC(O)C(O)C4O)C=5C=CC(O)=CC5	C26H28O14	563.14	55.2248	0.27250200278222	[M-H]-	563.145;353.068;383.077;443.101;473.114	3.70286e+07
Artemetin	flavonoids(黄酮类)	flavones(黄酮类);flavonols(黄酮醇类)	0.806685	COC1=C(C=C(C=C1)C2=C(C(=O)C3=C(C(=C(C=C3O2)OC)OC)O)OC)OC	C20H20O8	389.123	379.407	0.89872929717945	[M+H]	389.124;356.09;331.083;359.078;313.068	3.61709e+07
Meperidine	alkaloid(生物碱)	piperidines(哌啶类生物碱)	1	CCOC(=O)C1(CCN(CC1)C)C2=CC=CC=C2	C15H21NO2	248.165	103.71	1.88437436060298	[M+H]+	248.167;249.172;161.119;230.154;160.112	3.61175e+07
Palmatine	alkaloid(生物碱)	isoquinolines(异喹啉类生物碱);pyridines(吡啶类生物碱)	0.998632	COC1=CC2=C(C=C1OC)C1=CC3=CC=C(OC)C(OC)=C3C=[N+]1CC2	C21H22NO4	352.155	204.816	0.689368912285583	[M]+	352.153;336.123;337.132;308.126;322.105	3.60613e+07
5,7-dihydroxy-2-(4-hydroxyphenyl)-6,8-bis[3,4,5-trihydroxy-6-(hydroxymethyl)oxan-2-yl]chromen-4-one	flavonoids(黄酮类)	flavones(黄酮类)	0.91006	OCC1OC(C(O)C(O)C1O)C2=C(O)C(C3OC(CO)C(O)C(O)C3O)=C4OC(=CC(=O)C4=C2O)C5=CC=C(O)C=C5	C27H30O15	595.166	55.2377	1.87109973783061	[M+H]+	457.108;325.068;337.072;379.083;577.161	3.58457e+07
L-2,3-DIAMINOPROPIONIC ACID			0.982358	C(C(C(=O)O)N)N	C3H8N2O2	105.07	398.738	1.22058056085462	[M+H]+	105.07;79.054;106.073;103.054;95.049	3.568e+07
Azuleno(5,6-c)furan-1(3H)-one, 4,4a,5,6,7,7a,8,9-octahydro-3,4,8-trihydroxy-6,6,8-trimethyl-	terpenoids(萜类)	secoiridoid(裂环环烯醚萜类);mycrane_monoterpenoids(月桂烷型单萜类);lavandulane(薰衣草烷型单萜类);artemisane(蒿烷型单萜类)	0.957424	O=C1OC(O)C2=C1CC(O)(C)C3CC(C)(C)CC3C2O	C15H22O5	283.154	237.076	1.29097486564997	[M+H]+	247.132;219.137;201.127;265.142;207.103	3.56752e+07
Moracin C			0.718377	CC(C)=CCC1=C(O)C=C(C=C1O)C1=CC2=CC=C(O)C=C2O1	C19H18O4	311.128	389.888	1.13308049287857	[M+H]+	311.128;267.14;185.095;225.09;265.122	3.52004e+07
Mulberrin	flavonoids(黄酮类)	Artocarpus(波罗蜜属);Ramulus Mori(桑枝);Morus Mongolica(蒙桑);Sapindus Mukorossi(无患子叶);Sapindus Mukorossi(无患子皮);Morus Australis(澳大利亚桑);Morus Australis(小桑树);Morus Alba(桑白皮);Morus Alba(桑叶);Morus Alba(白桑);Morus Alba(桑实)	0.914091	CC(=CCC1=C2C(=C(C=C1O)O)C(=O)C(=C(O2)C3=C(C=C(C=C3)O)O)CC=C(C)C)C	C25H26O6	421.164	64.1839	0.444308003868671	[M-H]	421.161;96.96;59.014;78.96;422.17	3.51636e+07
Caffeic acid	phenylpropanoids(苯丙素类)	Gleditsiae Fructus(大皂荚);Aconitum Gymnandrum(露蕊乌头);Valeriana Jatamansi(蜘蛛香);Xanthium Sibiricum(苍耳子);Xanthium Sibiricum(苍耳);Salvia Chinensis(华鼠尾草);Andrographis Paniculata(穿心莲);Paeonia Suffruticosa(牡丹皮);Agrimonia Pilosa(仙鹤草根);Agrimonia Pilosa(龙芽草);Agrimonia Pilosa(鹤草芽);Agrimonia Pilosa(龙牙草);Curcuma Aromatica(郁金);Inula Japonica(菊科植物旋覆花);Inula Japonica(金沸草);Morinda Officinalis(巴戟天);Pinellia Ternata(半夏…	0.863928	O=C(O)C=CC1=CC=C(O)C(O)=C1	C9H8O4	179.035	37.5599	1.46725283649925	[M-H]-	135.044;59.014;179.057;134.038;73.03	3.39969e+07
Glutaric acid	Organic acids and derivatives(有机酸及其衍生物)	Beta Vulgaris(甜菜);Beta Vulgaris(糖菾菜);Bos Taurus Domesticus Gmelin(牛靥);Bos Taurus Domesticus Gmelin(牛脑);Bos Taurus Domesticus Gmelin(牛血);Bos Taurus Domesticus Gmelin(牛胆);Eucalyptus Citriodora(柠檬桉叶)	0.649288	O=C(O)CCCC(=O)O	C5H8O4	131.035	36.1028	0.266329673103596	[M-H]-	131.035;85.03;87.046;59.014;57.035	3.38792e+07
Soybean saponin fraction B1	terpenoids(萜类)	secoiridoid(裂环环烯醚萜类);mycrane_monoterpenoids(月桂烷型单萜类);menthane_monoterpenoids(薄荷烷型单萜类);lavandulane(薰衣草烷型单萜类);artemisane(蒿烷型单萜类);cyclogeraniane(环香叶烷型单萜类)	0.653871	CC1C(C(C(C(O1)OC2C(C(C(OC2OC3C(C(C(OC3OC4CCC5(C(C4(C)CO)CCC6(C5CC=C7C6(CCC8(C7CC(CC8O)(C)C)C)C)C)C)C(=O)O)O)O)CO)O)O)O)O)O	C48H78O18	943.529	396.158	0.650411041209301	[M+H]+	441.378;423.367;141.019;599.396;203.18	3.37419e+07
Austricine	alkaloid(生物碱)		0.881924	CC1C2C(CC(=C3C(C2OC1=O)C(=CC3=O)C)C)O	C15H18O4	263.128	240.292	0.768874625863416	[M+H]+	263.128;217.122;245.116;189.127;69.033	3.33254e+07
Batatasin IV			0.836214	COC1=CC(CCC2=CC=CC=C2O)=CC(O)=C1	C15H16O3	245.117	281.437	0.694949936643468	[M+H]+	245.116;95.049;139.04;227.107;201.127	3.27857e+07
Eupafolin	flavonoids(黄酮类)	Salvia Plebeia(荔枝草);Eupatorium Cuneifolium(楔叶泽兰);Lippia Nodiflora(蓬莱草);Panax Ginseng(人参芦);Panax Ginseng(人参叶);Panax Ginseng(人参花蕾);Panax Ginseng(人参);Saussurea Involucrata(雪莲);Saussurea Involucrata(天山雪莲);Artemisia Vestita(毛莲蒿);Eupatorium Subhastatum(近戟泽兰);Oroxylum Indicum(木蝴蝶树皮);Nepeta Hindostana(印度假荆芥);Rosmarinus Officinalis(迷迭香);Inula Japonica(菊科植物旋覆花);Inula Japonica(金沸草)	0.972784	COC1=C(C2=C(C=C1O)OC(=CC2=O)C3=CC(=C(C=C3)O)O)O	C16H12O7	315.051	210.526	0.409687873243271	[M-H]	300.029;315.054;136.988;301.03;316.056	3.26738e+07
Pyrocatechol	Phenols(酚类)		1	OC1=CC=CC=C1O	C6H6O2	111.044	52.6442	3.69076647443483	[M+H]+	111.045;112.039;65.038;83.048;131.533	3.264e+07
Coumaric acid	phenylpropanoids(苯丙素类)	penyipropionic acid(苯丙酸类)	0.99832	O=C(O)C=CC1=CC=C(O)C=C1	C9H8O3	147.044	83.861	2.05452343039006	[M+H-H2O]+	147.045;119.05;91.054;148.049;105.07	3.26326e+07
Zizyberanalic acid	terpenoids(萜类)	Glycyrrhiza Uralensis(甘草);Glycyrrhiza Uralensis(植物甘草);Glycyrrhiza Uralensis(乌拉尔甘草);Glycyrrhiza Inflata(胀果甘草)	0.760344	O=C(O)C7OC(OC1C(OC(C(=O)O)C(O)C1(O))OC3CCC4(C)(C5CC=C2C6CC(C(=O)O)(C)CCC6(C)(CCC2(C)C5(C)(CCC4(C3(C)(CO))))))C(O)C(O)C7(O)	C42H64O16	823.409	411.51	2.64782357152957	[M-H]-	823.418;351.054;113.024;823.503;193.036	3.25829e+07
Gancaonin V			0.607721	CC(C)=CCC1=C2CCC3=CC(O)=C(O)C=C3C2=C(O)C=C1O	C19H20O4	313.143	285.746	2.37344270378977	[M+H]+	269.153;313.141;171.081;271.099;199.075	3.23179e+07
Piperdial	terpenoids(萜类)	secoiridoid(裂环环烯醚萜类);mycrane_monoterpenoids(月桂烷型单萜类);lavandulane(薰衣草烷型单萜类);artemisane(蒿烷型单萜类)	0.763143	CC1C=C(C=O)C(C=O)C(O)C2CC(C)(C)CC12	C15H22O3	251.164	365.556	0.0137655358157631	[M+H]+	233.155;251.165;81.071;205.16;177.163	3.2253e+07
3,4-Dihydrocoumarin	terpenoids(萜类)		0.921346	O=C(C1)Oc(c2)c(ccc2)C1	C9H8O2	149.06	55.8695	0.548674668802638	[M+H]+	121.065;149.06;150.09;93.07;91.055	3.20515e+07
3,19-Dihydroxyurs-12-ene-23,28-dioic acid	terpenoids(萜类)	cyclogeraniane(环香叶烷型单萜类);lavandulane(薰衣草烷型单萜类);artemisane(蒿烷型单萜类);mycrane_monoterpenoids(月桂烷型单萜类);menthane_monoterpenoids(薄荷烷型单萜类);secoiridoid(裂环环烯醚萜类)	0.639533	CC1CCC2(CCC3(C)\C(=C/CC4C5(C)CCC(O)C(C)(C5CCC34C)C(O)=O)C2C1(C)O)C(O)=O	C30H46O6	485.327	189.769	0.512274203448853	[M-H2O+H]+	485.327;119.086;187.147;199.149;201.165	3.19633e+07
PHENYLACETIC ACID	Aromaticity(芳香族化合物)	Rehmannia Glutinosa(干地黄);Rehmannia Glutinosa(熟地黄);Rehmannia Glutinosa(生地黄);Rehmannia Glutinosa(紫地黄);Rehmannia Glutinosa(地黄);Rehmannia Glutinosa(鲜地黄(生地));Bupleurum Chinense(柴胡);Bupleurum Chinense(北柴胡);Angelica Sinensis(当归);Artemisia Capillaris(茵陈蒿);Bombax Ceiba(木棉花);Dipsacus Asperoides(川续断);Picria Felterrae(苦楝皮);Citrus Aurantium(酸橙);Citrus Aurantium(枳壳);Citrus Aurantium(苦橙);Citrus Aurantium(玳玳花);C…	0.743503	C1=CC=C(C=C1)CC(=O)O	C8H8O2	135.045	91.5663	2.28547278764946	[M-H]-	135.044;93.035;120.022;92.027;136.049	3.16294e+07
Benzyl alcohol + Hex-Pen		Glehnia Littoralis(北沙参)	0.781035	OCC3(O)(COC(OCC2OC(OCC1=CC=CC=C1)C(O)C(O)C2(O))C3(O))	C18H26O10	401.145	56.9575	0.691465546788136	[M-H]-	401.148;59.014;269.101;71.013;101.025	3.14137e+07
Pterosin O			1	COCCC1=C(C)C2=C(CC(C)C2=O)C=C1C	C15H20O2	233.154	54.2552	0.337123371264093	[M+H]+	233.155;234.149;215.142;173.133;175.111	3.13667e+07
2-METHYLMALEATE	Aliphatic acyl(脂肪酰类)	Cotyledon Tomentosa(莲座革菌);Saxifraga Stolonifera(虎耳草);Saccharum(甘蔗)	0.670661	CC(=CC(=O)O)C(=O)O	C5H6O4	129.019	44.1242	3.7697914760812	[M-H]-	85.03;129.02;57.035;101.025;55.019	3.13162e+07
Benzoic acid	Phenols(酚类)	Paeonia Lactiflora(白芍);Paeonia Lactiflora(芍药);Paeonia Lactiflora Pall(白芍药);Dalbergia Cochinchinensis(交趾黄檀);Dalbergia Cochinchinensis(酢浆草属);Phellodendron Japonicum(日本黄柏);Dalbergia Spruceana(俏黄檀);Homalium Cochinchinense(天料木);Ban-Lan-Gen(板蓝根);Paeonia Lactiflora Wild(赤芍);Achillea Sp.(菊三七);Gynura Segetum(三七草);Daemonorops Draco(麒麟竭);Crocus Sativus(藏红花);Crocus Sativus(番红花);Crocus Sativus(西红花);Hibiscus T…	1	OC(=O)c1ccccc1	C7H6O2	121.03	125.69	3.58482173298173	[M-H]-	121.029;122.025;120.022;94.029;65.999	3.05544e+07
Coniferyl aldehyde	phenylpropanoids(苯丙素类)		0.857393	COC1=CC(C=CC=O)=CC=C1O	C10H10O3	179.071	79.2983	1.47024150248215	[M+H]+	179.07;151.075;133.064;43.018;105.07	3.0527e+07
Anabasine	alkaloid(生物碱)	piperidines(哌啶类生物碱);pyridines(吡啶类生物碱)	0.859515	C1CCC(NC1)C1=CC=CN=C1	C10H14N2	163.123	34.8725	0.130950502220628	[M+H]+	163.124;164.107;135.045;146.096;94.065	2.96799e+07
Isoeugenol			1	COC1=CC(\C=C\C)=CC=C1O	C10H12O2	165.091	59.1861	2.14307529039929	[M+H]+	165.089;166.121;119.085;137.095;123.081	2.90543e+07
Camphor	terpenoids(萜类)	mycrane_monoterpenoids(月桂烷型单萜类);menthane_monoterpenoids(薄荷烷型单萜类);lavandulane(薰衣草烷型单萜类);camphane(崁烷型单萜类)	0.894838	CC1(C2CCC1(C(=O)C2)C)C	C10H16O	153.127	1.84434	1.32251947185445	[M+H]	153.127;43.018;97.064;135.117;69.07	2.87287e+07
Dihydroxanthohumol	flavonoids(黄酮类)	dihydrochalcones(二氢查尔酮类)	0.724042	COc1cc(O)c(CC=C(C)C)c(O)c1C(=O)CCc2ccc(O)cc2	C21H24O5	357.17	411.86	0.0100562618453852	[M+H]+	123.043;302.11;124.047;358.172;165.055	2.84267e+07
Chrysosplenetin B	flavonoids(黄酮类)	flavones(黄酮类);flavonols(黄酮醇类)	0.828808	COC1=C(C=CC(=C1)C2=C(C(=O)C3=C(C(=C(C=C3O2)OC)OC)O)OC)O	C19H18O8	375.108	335.101	1.10355457584958	[M+H]	375.109;314.082;342.076;360.085;359.078	2.83273e+07
Parillin	terpenoids(萜类);steroidal saponin(甾体皂苷类)	artemisane(蒿烷型单萜类);mycrane_monoterpenoids(月桂烷型单萜类);menthane_monoterpenoids(薄荷烷型单萜类);secoiridoid(裂环环烯醚萜类);spirostanols(螺甾烷醇类);cyclogeraniane(环香叶烷型单萜类);iridoid(环戊烷环烯醚萜类);lavandulane(薰衣草烷型单萜类);isospirostanols(异螺甾烷醇类)	0.619919	CC1C2C(CC3C4CCC5CC(CCC5(C)C4CCC23C)OC2OC(COC3OC(CO)C(O)C(O)C3O)C(OC3OC(C)C(O)C(O)C3O)C(O)C2OC2OC(CO)C(O)C(O)C2O)OC11CCC(C)CO1	C51H84O22	1049.55	232.757	0.712221058835609	[M+H]+	1049.558;887.486;887.518;1049.477;419.132	2.82239e+07
Sinapine	phenylpropanoids(苯丙素类)	penyipropionic acid(苯丙酸类)	0.658679	C[N+](C)(C)CCOC(=O)C=CC1=CC(=C(C(=C1)OC)O)OC	C16H24NO5	310.165	51.0886	2.2054939151358	[M]+	251.093;310.169;175.039;207.064;252.095	2.8181e+07
dihydrodamascenone			0.661992	CC(=O)CCC1=C(C)C=CCC1(C)C	C13H20O	193.159	217.994	1.11356808394416	[M+H]+	193.16;175.148;135.117;111.08;133.101	2.77481e+07
Jatrorrhizine	alkaloid(生物碱)	isoquinolines(异喹啉类生物碱);pyridines(吡啶类生物碱)	0.921048	COC1=C(C2=C[N+]3=C(C=C2C=C1)C4=CC(=C(C=C4CC3)O)OC)OC	C20H20NO4+	338.139	165.469	0.74886796357084	[M+]	338.137;323.114;322.105;294.115;308.093	2.73376e+07
Yuccoside C	terpenoids(萜类);steroidal saponin(甾体皂苷类)	secoiridoid(裂环环烯醚萜类);spirostanols(螺甾烷醇类);mycrane_monoterpenoids(月桂烷型单萜类);menthane_monoterpenoids(薄荷烷型单萜类);iridoid(环戊烷环烯醚萜类);lavandulane(薰衣草烷型单萜类);artemisane(蒿烷型单萜类);isospirostanols(异螺甾烷醇类);cyclogeraniane(环香叶烷型单萜类)	0.848265	CC1C2C(CC3C4CCC5CC(CCC5(C)C4CCC23C)OC2OC(CO)C(OC3OC(CO)C(O)C(O)C3OC3OC(CO)C(O)C(O)C3O)C(O)C2O)OC11CCC(C)CO1	C45H74O18	903.506	217.094	9.50368259818287	[M+H]+	255.209;903.513;903.48;273.223;417.335	2.69034e+07
m-Xylene			0.987527	CC1=CC(C)=CC=C1	C8H10	107.086	415.53	4.58124566694726	[M+H]+	107.085;91.054;105.07;42.034;109.065	2.67566e+07
Abscisic acid	terpenoids(萜类)	Sesquiterpenoids(倍半萜类)	0.840739	CC1=CC(=O)CC(C1(C=CC(=CC(=O)O)C)O)(C)C	C15H20O4	265.144	203.291	1.77788051818774	[M+H]	265.143;247.133;229.122;219.137;201.128	2.675e+07
Atractylenolide III	terpenoids(萜类)	Sesquiterpenoids(倍半萜类)	0.970187	CC1=C2CC3C(=C)CCCC3(C)CC2(O)OC1=O	C15H20O3	249.149	408.617	2.49349991932486	[M+H]+	231.137;249.15;163.077;175.075;69.07	2.67192e+07
rutamarin	phenylpropanoids(苯丙素类)	Boenninghausenia Albiflora(臭节草);Boenninghausenia Albiflora(岩椒草);Boenninghausenia Albiflora(日本白松风草);Boenninghausenia Japonica(日本臭节草);Ruta Graveolens(臭草);Ruta Graveolens(芸香)	0.887368	O=C1OC=2C=C3OC(CC3=CC2C=C1C(C=C)(C)C)C(OC(=O)C)(C)C	C21H24O5	355.154	411.51	1.87939553552475	[M-H]-	355.157;135.044;323.128;233.12;207.103	2.67189e+07
Betulin	terpenoids(萜类)	cyclogeraniane(环香叶烷型单萜类);mycrane_monoterpenoids(月桂烷型单萜类);menthane_monoterpenoids(薄荷烷型单萜类);lavandulane(薰衣草烷型单萜类);artemisane(蒿烷型单萜类);secoiridoid(裂环环烯醚萜类)	0.696397	CC(=C)C1CCC2(CO)CCC3(C)C(CCC4C5(C)CCC(O)C(C)(C)C5CCC34C)C12	C30H50O2	425.378	484.661	1.07815791028458	[M+H-H2O]+	425.384;109.101;95.085;123.117;135.117	2.61309e+07
Dihydrocapsaicin	alkaloid(生物碱)		0.666072	CC(C)CCCCCCC(=O)NCc(c1)cc(OC)c(O)c1	C18H29NO3	308.222	241.871	0.211263117957285	[M+H]+	308.223;290.211;309.227;262.218;179.13	2.61205e+07
(S)-Isosclerone			0.74993	OC1CCC(=O)C2=C1C=CC=C2O	C10H10O3	179.07	99.5989	1.11602810054943	[M+H]+	161.06;179.07;143.05;43.018;115.055	2.54373e+07
Biorobin	flavonoids(黄酮类)	Nodus Nelumbinis Rhizomatis(藕节);Cuscuta Chinensis(菟丝子);Bupleurum Chinense(柴胡);Bupleurum Chinense(北柴胡);Ginkgo Biloba(白果叶);Ginkgo Biloba(白果);Ginkgo Biloba(白果树皮);Ginkgo Biloba(白果根);Ginkgo Biloba(银杏);Rosa Chinensis(月季花);Nelumbo Nucifera(藕);Nelumbo Nucifera(莲子);Nelumbo Nucifera(荷叶);Nelumbo Nucifera(莲子心);Nelumbo Nucifera(莲);Nelumbo Nucifera(荷);Nelumbo Nucifera(荷叶蒂)	0.887731	CC1C(C(C(C(O1)OCC2C(C(C(C(O2)OC3=C(OC4=CC(=CC(=C4C3=O)O)O)C5=CC=C(C=C5)O)O)O)O)O)O)O	C27H30O15	593.151	95.4616	0.142238124905188	[M-H]-	285.041;593.144;284.032;65.907;594.152	2.52055e+07
Isoscopoletin	phenylpropanoids(苯丙素类)	Artemisia Scoparia(黄蒿);Artemisia Scoparia(植物滨蒿);Paederia Scandens(鸡屎藤);Paederia Scandens(鸡矢藤);Buxus Microphylla(黄杨木叶);Buxus Microphylla(小叶黄杨);Euphorbia Kansui(甘遂);Chloranthus Japonicus(银线草);Solanum Melongena(茄);Solanum Melongena(茄叶);Solanum Melongena(茄子);Actinidia Chinensis(猕猴桃);Erigeron Breviscapus(灯盏细辛);Erigeron Breviscapus(短葶飞蓬);Lobelia Chinensis(半边莲);Euphorbia Humifusa(地锦草);Viola Philippica(紫…	0.882849	COC1=C(C=C2C=CC(=O)OC2=C1)O	C10H8O4	191.035	920.212	0.651920249167728	[M-H]	176.013;191.037;102.949;111.009;148.016	2.52007e+07
Licoricesaponin H2	terpenoids(萜类)	secoiridoid(裂环环烯醚萜类);mycrane_monoterpenoids(月桂烷型单萜类);menthane_monoterpenoids(薄荷烷型单萜类);lavandulane(薰衣草烷型单萜类);artemisane(蒿烷型单萜类);cyclogeraniane(环香叶烷型单萜类)	0.925537	CC1(C)C(CCC2(C)C1CCC1(C)C2C(=O)C=C2C3CC(C)(CCC3(C)CCC12C)C(O)=O)OC1OC(C(O)C(O)C1OC1OC(C(O)C(O)C1O)C(O)=O)C(O)=O	C42H62O16	823.411	338.226	1.16662100716182	[M+H]+	453.341;454.339;647.381;471.349;95.086	2.50547e+07
Fraxetin	phenylpropanoids(苯丙素类)	coumarins(香豆素类)	1	COc1cc2ccc(=O)oc2c(O)c1O	C10H8O5	209.045	47.0966	1.99622489894703	[M+H]+	209.046;210.113;149.023;194.02;163.039	2.49971e+07
Panaquinquecol 1			0.789448	CCCCCCCC(OC)C(O)CC#CC#CC(O)C=C	C18H28O3	293.212	291.195	2.25992304691512	[M+H]+	275.201;293.215;107.085;81.07;69.07	2.49336e+07
Furostane base -2H + O-Hex, O-Hex-Hex-dHex	terpenoids(萜类)	cyclogeraniane(环香叶烷型单萜类);iridoid(环戊烷环烯醚萜类);lavandulane(薰衣草烷型单萜类);artemisane(蒿烷型单萜类);mycrane_monoterpenoids(月桂烷型单萜类);menthane_monoterpenoids(薄荷烷型单萜类);secoiridoid(裂环环烯醚萜类)	0.861194	OCC9OC(OCC(C)CCC7(O)(OC6CC5C8CC=C4CC(OC3OC(CO)C(O)C(OC1OC(CO)C(O)C(O)C1(O))C3(OC2OC(C)C(O)C(O)C2(O)))CCC4(C)C8(CCC5(C)C6C7(C))))C(O)C(O)C9(O)	C51H84O23	1047.54	309.326	2.5293201133328	[M-H2O+H]+	415.326;271.206;253.194;577.381;129.055	2.46503e+07
kojic acid			1	O=C1C=C(OC=C1O)CO	C6H6O4	143.034	42.6995	1.7614677714298	[M+H]+	143.035;144.103;43.018;71.049;125.024	2.45997e+07
GALACTARATE	Carbohydrates and derivatives(糖类及其衍生物)	Phyllanthus Emblica(油柑叶);Phyllanthus Emblica(油柑木皮);Phyllanthus Emblica(油柑);Phyllanthus Emblica(余甘子);Phyllanthus Emblica(庵摩勒);Phyllanthus Emblica(油柑根);Stauntonia Obovatifoliola Hayata(那藤果);Ginkgo Biloba(白果叶);Ginkgo Biloba(白果);Ginkgo Biloba(白果树皮);Ginkgo Biloba(白果根);Ginkgo Biloba(银杏)	0.709565	C(C(C(C(=O)O)O)O)(C(C(=O)O)O)O	C6H10O8	209.03	40.5217	1.15460698629101	[M-H]-	85.03;165.055;209.027;59.014;191.018	2.44359e+07
(2E)-Piperamide-C5:1			0.694088	O=C(\C=C\CCC1=CC2=C(OCO2)C=C1)N1CCCC1	C16H19NO3	274.145	69.9493	2.07783633931554	[M+H]+	274.142;202.086;256.132;172.077;224.108	2.44003e+07
Loliolide	terpenoids(萜类)		0.904878	CC1(CC(CC2(C1=CC(=O)O2)C)O)C	C11H16O3	197.118	113.002	3.47002950281598	[M+H]+	197.116;179.107;135.117;133.101;107.085	2.43001e+07
Quercetin	flavonoids(黄酮类)	flavonols(黄酮醇类);flavones(黄酮类)	0.988382	C1=CC(=C(C=C1C2=C(C(=O)C3=C(C=C(C=C3O2)O)O)O)O)O	C15H10O7	303.051	85.4167	1.89567322545668	[M+H]	303.052;285.04;153.018;257.045;177.055	2.41839e+07
Ginsenoside Ro	terpenoids(萜类)	Achyranthes Bidentata(牛膝);Panax Pseudo-Ginseng(假人参);Panax Ginseng(人参芦);Panax Ginseng(人参叶);Panax Ginseng(人参花蕾);Panax Ginseng(人参)	0.959193	CC1(C)CCC2(CCC3(C)C(=CCC4C5(C)CCC(OC6OC(C(O)C(O)C6OC6OC(CO)C(O)C(O)C6O)C(O)=O)C(C)(C)C5CCC34C)C2C1)C(=O)OC1OC(CO)C(O)C(O)C1O	C48H76O19	955.489	547.296	0.974668102993119	[M-H]-	955.492;955.528;909.489;956.52;909.522	2.36169e+07
P-Anisic acid	Phenols(酚类)	Vitex Rotundifolia(单叶蔓荆子);Vitex Rotundifolia(蔓荆子);Angelica Sinensis(当归);Notopterygium Incisum(羌活);Notopterygium Incisum(草本植物羌活);Pinellia Ternata(半夏);Illicium Verum(八角茴香);Illicium Verum(八角);Foeniculum Vulgare(茴香茎叶);Foeniculum Vulgare(小茴香);Foeniculum Vulgare(茴香根);Taraxacum Formosanum(台湾蒲公英);Tabebuia Avellanedae(褐色钟花树);Aquilaria Sinensis(白木香);Aquilaria Sinensis(牙香树);Aquilaria Sinensis(植物沉香);Chaenome…	0.950518	O=C(O)C1=CC=C(OC)C=C1	C8H8O3	151.04	60.2413	1.92749225268617	[M-H]-	151.039;108.022;109.03;136.016;152.036	2.3596e+07
(-)-12-Hydroxyjasmonic acid	Jasmonic acid(茉莉酸类)		0.718953	O=C(O)CC1CCC(=O)C1(CC=CCCO)	C12H18O4	227.128	139.089	1.65486966821641	[M+H]+	227.127;125.096;97.101;55.054;189.111	2.28195e+07
Sarracenin	terpenoids(萜类)		0.641994	CC1C2C3CC(O1)OC2OC=C3C(=O)OC	C11H14O5	227.092	55.8695	1.2934189752272	[M+H]	149.06;121.065;177.055;106.065;93.07	2.27871e+07
2,3-DIHYDROXYBENZOATE		Rosa Chinensis(月季花);Aglaia Odorata(米仔兰);Rhododendron Mucronatum(白花映山红);Rhododendron Mucronatum(白花杜鹃)	0.868859	C1=CC(=C(C(=C1)O)O)C(=O)O	C7H6O4	153.019	77.3561	1.53088678769839	[M-H]-	153.02;109.029;135.009;65.04;125.025	2.25495e+07
Pyrogallol	Phenols(酚类)	Peperomia Heyneana(蒙自草胡椒);Rheum Maximowiczii(马氏大黄);Canarii Fructus(青果);Paeonia Lactiflora Wild(赤芍);Ceratonia Siliqua(长角豆);Euphorbia Lathyris(续随子茎中白汁);Euphorbia Lathyris(续随子 (大戟属));Euphorbia Lathyris(千金子);Rosa Rugosa(玫瑰花);Rosa Rugosa(蔷薇属);Paeonia Lactiflora(白芍);Paeonia Lactiflora(芍药);Eucommia Ulmoides(杜仲叶);Rubus Rigidus(坚硬悬钩子);Saxifraga Stolonifera(虎耳草);Geum Urbanum(香草水杨梅);Rosa Multiflora(蔷薇);Rosa…	0.897618	C1=CC(=C(C(=C1)O)O)O	C6H6O3	125.025	37.0788	3.90385885539443	[M-H]	125.025;81.035;69.034;97.03;55.019	2.23937e+07
4-Methoxysalicylic acid	Phenols(酚类)	Calophyllum Polyanthum(滇南红厚壳)	0.663915	COC1=CC(=C(C=C1)C(=O)O)O	C8H8O4	167.035	38.0103	0.0853692267974468	[M-H]	167.035;123.046;152.011;108.022;95.014	2.23532e+07
Kaempferide	flavonoids(黄酮类)	flavonols(黄酮醇类);flavones(黄酮类)	0.999555	O=C1C(O)=C(OC2=CC(O)=CC(O)=C12)C3=CC=C(OC)C=C3	C16H12O6	301.07	147.476	0.38015909427203	[M+H]+	301.073;286.048;163.112;121.101;79.054	2.22182e+07
Isolicoflavonol	flavonoids(黄酮类)	flavonols(黄酮醇类);flavones(黄酮类)	1	CC(=CCc1cc(ccc1O)c2oc3cc(O)cc(O)c3c(=O)c2O)C	C20H18O6	355.118	429.395	0.483106651466624	[M+H]+	300.06;356.122;299.058;151.04;180.037	2.19468e+07
Coumaroyl tyramine			0.873025	O=C(C=CC1=CC=C(O)C=C1)NCCC2=CC=C(O)C=C2	C17H17NO3	284.128	175.339	0.291828625974259	[M+H]+	147.044;121.065;284.129;267.066;119.05	2.18444e+07
Luteolin-4'-O-glucoside	flavonoids(黄酮类)	flavones(黄酮类)	0.888772	OCC1OC(OC2=CC=C(C=C2O)C2=CC(=O)C3=C(O)C=C(O)C=C3O2)C(O)C(O)C1O	C21H20O11	449.108	128.459	0.312740040459059	[M+H]+	287.056;288.058;449.105;85.029;97.029	2.14392e+07
Phenylpropanolamine	Aromaticity(芳香族化合物)		0.743603	OC(C=1C=CC=CC1)C(N)C	C9H13NO	152.107	368.388	0.534210493964208	[M+H]+	91.054;117.071;152.106;153.054;43.018	2.09328e+07
L-Hyoscyamine	alkaloid(生物碱)	piperidines(哌啶类生物碱);tropines(托品类生物碱)	0.997505	CN1C2CCC1CC(C2)OC(=O)C(CO)C1=CC=CC=C1	C17H23NO3	290.175	925.495	1.11498351603971	[M+H]+	290.176;124.112;93.07;291.178;51.413	2.07692e+07
4-Methylumbelliferone	phenylpropanoids(苯丙素类)	coumarins(香豆素类)	1	CC1=CC(=O)OC2=C1C=CC(=C2)O	C10H8O3	177.055	93.1857	2.46976165591625	[M+H]	177.055;186.054;145.029;117.034;149.06	2.05977e+07
Kanzonol K	flavonoids(黄酮类)	isoflavones(异黄酮类)	0.623738	COC1=CC2=C(C(O)=C1CC=C(C)C)C(=O)C(=CO2)C1=C(O)C(CC=C(C)C)=C(O)C=C1	C26H28O6	437.193	491.448	2.29266976914692	[M+H]+	437.19;438.201;210.186;303.122;227.214	2.04813e+07
Asarylaldehyde	Phenols(酚类)		0.757289	COC1=CC(=C(C=C1C=O)OC)OC	C10H12O4	197.081	58.0876	0.896760248394325	[M+H]	151.04;73.029;197.08;179.07;125.061	2.00891e+07
(3beta,6beta)-Furanoeremophilane-3,6-diol	terpenoids(萜类)	secoiridoid(裂环环烯醚萜类)	0.683166	CC1C(O)CCC2CC3=C(C(O)C12C)C(C)=CO3	C15H22O3	251.165	66.0328	0.0341329495928361	[M+H]+	251.165;233.154;175.111;215.142;145.101	1.99808e+07
Capsicoside B2	terpenoids(萜类);steroidal saponin(甾体皂苷类)	secoiridoid(裂环环烯醚萜类);spirostanols(螺甾烷醇类);mycrane_monoterpenoids(月桂烷型单萜类);menthane_monoterpenoids(薄荷烷型单萜类);iridoid(环戊烷环烯醚萜类);lavandulane(薰衣草烷型单萜类);artemisane(蒿烷型单萜类);isospirostanols(异螺甾烷醇类);cyclogeraniane(环香叶烷型单萜类)	0.810178	CC1C2C(CC3C4CCC5CC(CCC5(C)C4CCC23C)OC2OC(CO)C(OC3OC(CO)C(O)C(O)C3O)C(O)C2O)OC11CCC(C)CO1	C39H64O13	741.442	313.051	0.0318452066634128	[M+H]+	579.384;255.209;435.275;161.132;85.028	1.99025e+07
Ganoderic acid Mf	terpenoids(萜类)	cyclogeraniane(环香叶烷型单萜类);secoiridoid(裂环环烯醚萜类);mycrane_monoterpenoids(月桂烷型单萜类);iridoid(环戊烷环烯醚萜类);lavandulane(薰衣草烷型单萜类);artemisane(蒿烷型单萜类)	1	CC(CC\C=C(/C)C(O)=O)C1CC(O)C2(C)C3=CCC4C(C)(C)C(CCC4(C)C3=CCC12C)OC(C)=O	C32H48O5	513.358	857.24	0.306608599146232	[M+H]+	513.355;514.362;57.041;95.086;119.086	1.98381e+07
Quercetin-3-O-galactoside	flavonoids(黄酮类)	Betula(桦木属);Saururus Chinensis(三白草);Uncaria Rhynchophylla(钩藤);Pyrola Decorata(普通鹿蹄草);Crataegus Kansuensis(甘肃山楂);Apocynum Venetum(罗布麻);Polygonum Cuspidatum(虎扙);Polygonum Cuspidatum(虎杖叶);Sauropus Androgynum(铃兰);Eupatorium Lindleyanum(秤杆升麻);Hypericum Erectum(小连翘);Agrimonia Pilosa(仙鹤草根);Agrimonia Pilosa(龙芽草);Agrimonia Pilosa(鹤草芽);Agrimonia Pilosa(龙牙草);Rhododendron Micranthum(照山白);Cuscuta Chinensis(菟丝…	0.935606	O=C2C(OC1OC(CO)C(O)C(O)C1(O))=C(OC3=CC(O)=CC(O)=C23)C4=CC=C(O)C(O)=C4	C21H20O12	463.091	73.9633	2.84085082744357	[M-H]-	59.014;463.095;71.013;89.024;101.024	1.94783e+07
Solasodine	terpenoids(萜类);alkaloid(生物碱)	iridoid(环戊烷环烯醚萜类);lavandulane(薰衣草烷型单萜类);artemisane(蒿烷型单萜类);mycrane_monoterpenoids(月桂烷型单萜类);menthane_monoterpenoids(薄荷烷型单萜类);secoiridoid(裂环环烯醚萜类);cyclogeraniane(环香叶烷型单萜类);piperidines(哌啶类生物碱)	1	CC1CCC2(C(C3C(O2)CC4C3(CCC5C4CC=C6C5(CCC(C6)O)C)C)C)NC1	C27H43NO2	414.337	134.637	0.773938037978014	[M+H]+	414.342;415.336;396.327;85.029;112.076	1.93303e+07
3-Phenyllactic acid		Saussurea Involucrata(雪莲);Saussurea Involucrata(天山雪莲)	0.925476	O=C(O)C(O)CC=1C=CC=CC1	C9H10O3	165.056	105.871	2.29891670304994	[M-H]-	147.046;165.057;72.994;119.05;74.002	1.90401e+07
(EZ)-sinapic acid	phenylpropanoids(苯丙素类)	Sinapis Semen(芥子);Vitis Vinifera(酿酒葡萄);Vitis Vinifera(葡萄藤叶);Vitis Vinifera(葡萄);Stemona Kerrii(地梢瓜);Lepidium Sativum(家独行菜);Allium Cepa(洋葱);Foeniculum Vulgare(茴香茎叶);Foeniculum Vulgare(小茴香);Foeniculum Vulgare(茴香根);Ligusticum Chuanxiong(川芎);Ligusticum Chuanxiong(香果);Descurainia Sophia(葶苈子);Descurainia Sophia(播娘蒿);Descurainia Sophia(南葶苈子);Pterocarpus Santalinus(似紫檀);Pterocarpus Santalinus(小叶紫檀);Davall…	0.635976	COC1=CC(C=CC(O)=O)=CC(OC)=C1O	C11H12O5	223.061	114.375	1.21663510964787	[M-H]-	223.06;91.055;163.041;161.062;133.065	1.88159e+07
3,5-Dimethoxy-4-hydroxybenzaldehyde	Phenols(酚类)		0.774952	COC1=CC(=CC(=C1O)OC)C=O	C9H10O4	183.065	101.081	1.09962328486257	[M+H]	123.044;95.049;155.071;183.065;140.047	1.88092e+07
Phloroglucinol	Phenols(酚类)		0.906225	OC=1C=C(O)C=C(O)C1	C6H6O3	127.039	206.138	0.998865830531482	[M+H]+	127.038;43.018;109.028;71.049;128.071	1.87958e+07
Paeonol	Phenols(酚类)		0.815929	CC(=O)C1=C(C=C(C=C1)OC)O	C9H10O3	167.07	320.459	2.34234997526542	[M+H]	167.069;152.048;134.037;106.042;105.034	1.8722e+07
Verbascoside	phenylpropanoids(苯丙素类)	penyipropionic acid(苯丙酸类)	0.670938	CC1C(C(C(C(O1)OC2C(C(OC(C2OC(=O)C=CC3=CC(=C(C=C3)O)O)CO)OCCC4=CC(=C(C=C4)O)O)O)O)O)O	C29H36O15	642.241	130.54	2.90763224948905	[M+NH4]	163.039;325.089;71.049;181.051;85.029	1.83264e+07
3,4-Dihydrocadalene			0.718749	CC(C)C1CC=C(C)C2=C1C=C(C)C=C2	C15H20	201.164	309.326	0.666104100351891	[M+H]+	201.165;145.101;159.117;131.085;173.133	1.81333e+07
3-(1,1-Dimethylallyl)herniarin	phenylpropanoids(苯丙素类)	coumarins(香豆素类)	0.972942	COC1=CC2=C(C=C1)C=C(C(=O)O2)C(C)(C)C=C	C15H16O3	245.117	168.925	1.30708583748789	[M+H]+	245.116;227.107;212.083;246.119;230.095	1.79815e+07
Sebacic acid	Aliphatic acyl(脂肪酰类)	Ricinus Communis(蓖麻叶);Ricinus Communis(蓖麻根);Ricinus Communis(蓖麻);Ricinus Communis(蓖麻油);Ban-Lan-Gen(板蓝根);Scirpus Fluviatilis(三棱);Ranunculus Ternatus(猫爪草);Angelica Sinensis(当归);Scutellaria Lateriflora(黄苓)	0.932282	OC(=O)CCCCCCCCC(O)=O	C10H18O4	201.113	208.044	1.3308954705387	[M-H]-	201.113;139.114;183.103;57.034;111.082	1.79807e+07
Apigenin	flavonoids(黄酮类)	flavones(黄酮类)	1	C1=CC(=CC=C1C2=CC(=O)C3=C(C=C(C=C3O2)O)O)O	C15H10O5	271.06	129.51	1.24023697348936	[M+H]	271.062;272.163;217.122;95.086;235.134	1.79275e+07
Coumaroyl quinic acid	phenylpropanoids(苯丙素类)		0.774093	O=C(OC1CC(O)(C(=O)O)CC(O)C1(O))C=CC2=CC=C(O)C=C2	C16H18O8	337.093	54.7324	0.97528007012297	[M-H]-	173.045;191.055;163.041;93.035;119.051	1.77457e+07
Dibutyl phthalate	Aromaticity(芳香族化合物)		0.700316	CCCCOC(=O)C1=CC=CC=C1C(=O)OCCCC	C16H22O4	279.159	605.557	0.943817733538937	[M+H]+	149.023;190.052;57.07;205.085;59.049	1.74943e+07
MALEIC ACID	Organic acids and derivatives(有机酸及其衍生物)	Saccharum(甘蔗);Mahoniae Caulis(功劳木);Ganoderma Sinensis(紫芝);Lithospermum Arvense(麦家公);Fumaria Officinalis(药用球果紫堇);Fumaria Officinalis(球果紫堇);Corydalis Yanhusuo(延胡索);Helianthus Annuus(向日葵叶);Helianthus Annuus(向日葵花);Helianthus Annuus(向日葵籽);Helianthus Annuus(向日葵茎髓);Plantago Major(大车前);Ban-Lan-Gen(板蓝根);Urtica Dioica(异株荨麻);Isatis Indigotica(大青叶);Malus Domestica(苹果);Malus Domestica(苹果海棠);Pyrrosia Sheareri(…	0.92309	C(=CC(=O)O)C(=O)O	C4H4O4	115.004	58.0594	1.88991567047343	[M-H]-	71.015;115.004;59.014;115.921;73.03	1.74627e+07
p-Coumaric acid	phenylpropanoids(苯丙素类)	penyipropionic acid(苯丙酸类)	0.864825	C1=CC(=CC=C1C=CC(=O)O)O	C9H8O3	165.055	83.861	1.70817237653453	[M+H]	147.045;119.05;165.055;91.055;120.081	1.72692e+07
Rheic acid	quinones(醌类)	Rheum Australe(藏边大黄);Hemerocallis Thunbergii(麝香萱);Cassia Acutifolia(尖叶番泻叶);Rheum Palmatum(掌叶大黄);Polygonum Cuspidatum(虎扙);Polygonum Cuspidatum(虎杖叶);Cassia Tora(决明子);Rheum Officinale(大黄);Pharbitis Nil(牵牛子);Ruta Graveolens(臭草);Ruta Graveolens(芸香);Polygonum Multiflorum(何首乌);Polygonum Multiflorum(夜交藤);Cassia Mimosoides(山扁豆子);Cassia Mimosoides(含羞草决明);Cassia Angustifolia(番泻叶);Cassia Angustifolia(番泻);Rhe…	0.998241	C1=CC2=C(C(=C1)O)C(=O)C3=C(C2=O)C=C(C=C3O)C(=O)O	C15H8O6	283.025	100.97	1.44758743947892	[M-H]	283.023;255.028;136.989;268.038;65.004	1.7152e+07
N-Acetyl-DL-glutamic acid	Amino acid derivatives(氨基酸衍生物)	Pinellia Ternata(半夏);Prinsepiae Nux(蕤仁)	0.956574	CC(=O)NC(CCC(O)=O)C(O)=O	C7H11NO5	188.056	33.9733	1.95590302661727	[M-H]-	128.035;59.014;102.056;188.057;144.067	1.65095e+07
Isosinensetin	flavonoids(黄酮类)	flavones(黄酮类)	0.732296	COC1=C(C=C(C=C1)C2=CC(=O)C3=C(O2)C(=C(C=C3OC)OC)OC)OC	C20H20O7	373.129	325.64	2.18225952773934	[M+H]	373.128;343.081;358.107;374.134;357.1	1.64854e+07
Gerberinol			0.630123	CC1=C2C(O)=C(CC3=C(O)C4=C(C)C=CC=C4OC3=O)C(=O)OC2=CC=C1	C21H16O6	365.1	343.216	1.96275386542912	[M+H]+	365.1;335.053;366.106;350.075;347.184	1.64339e+07
Aurantio-obtusin	quinones(醌类)	anthraquinones(蒽醌类)	0.605308	CC1=CC2=C(C(=C1O)OC)C(=O)C3=C(C(=C(C=C3C2=O)O)OC)O	C17H14O7	331.081	276.524	0.768019969948305	[M+H]	331.083;298.048;270.052;316.056;332.083	1.63708e+07
Armexifolin	terpenoids(萜类)	artemisane(蒿烷型单萜类)	0.66195	CC1=C2C3OC(=O)C(=C)C3CCC2(C)C(O)CC1=O	C15H18O4	263.128	209.197	0.440446345533468	[M+H]+	263.127;217.122;245.116;185.095;157.1	1.62486e+07
Jaceosidin	flavonoids(黄酮类)	Artemisia Argyi(艾叶)	0.923836	COC1=C(C=CC(=C1)C2=CC(=O)C3=C(O2)C=C(C(=C3O)OC)O)O	C17H14O7	329.067	276.243	0.657093695507973	[M-H]	329.068;299.021;314.043;313.036;241.16	1.61391e+07
8-(2-hydroxy-3-methylbut-3-enyl)-7-methoxychromen-2-one	phenylpropanoids(苯丙素类)	coumarins(香豆素类)	0.803623	COC1=CC=C2C=CC(=O)OC2=C1CC(O)C(C)=C	C15H16O4	243.102	189.945	1.09795126758976	[M-H2O+H]+	243.101;189.055;131.049;201.056;187.04	1.59951e+07
2-[[(2R,3S)-2-(3,4-dihydroxyphenyl)-3,5-dihydroxy-3,4-dihydro-2H-chromen-7-yl]oxy]oxane-3,4,5-triol			1	O=C1OC2CC(C(=CCC2C1=C)CCC(=O)C)C	C15H20O3	271.131	349.83	0.214056882549165	[M+Na]+	271.131;272.094;229.084;257.069;253.122	1.56907e+07
Acetophenone	Phenols(酚类)		0.943722	CC(=O)C1=CC=CC=C1	C8H8O	121.065	55.8695	0.858448005516878	[M+H]	121.065;93.07;91.054;122.06;112.039	1.54716e+07
Scopoletin	phenylpropanoids(苯丙素类)	coumarins(香豆素类)	0.99786	O=C1OC=2C=C(O)C(OC)=CC2C=C1	C10H8O4	193.05	98.4528	0.747360584575566	[M+H]+	193.05;133.029;178.027;137.059;194.053	1.53764e+07
Azuleno(5,6-c)furan-1(3H)-one, 4,4a,5,6,7,7a,8,9-octahydro-3,4,8-trihydroxy-6,6,8-trimethyl-	terpenoids(萜类)		0.893789	O=C1OC(O)C2=C1CC(O)(C)C3CC(C)(C)CC3C2O	C15H22O5	281.14	146.572	1.80130456392734	[M-H]-	281.14;219.141;57.034;201.127;121.066	1.52807e+07
(-)-3-Thujene	terpenoids(萜类)	secoiridoid(裂环环烯醚萜类)	0.894539	CC(C)C12CC1C(C)=CC2	C10H16	137.133	16.9498	4.03076124463544	[M+H]+	81.07;95.086;137.096;109.065;43.018	1.52656e+07
Maslinic acid	terpenoids(萜类)	secoiridoid(裂环环烯醚萜类);lavandulane(薰衣草烷型单萜类);artemisane(蒿烷型单萜类);mycrane_monoterpenoids(月桂烷型单萜类);menthane_monoterpenoids(薄荷烷型单萜类);cyclogeraniane(环香叶烷型单萜类)	0.796834	CC1(C)CCC2(CCC3(C)C(=CCC4C5(C)CC(O)C(O)C(C)(C)C5CCC34C)C2C1)C(O)=O	C30H48O4	473.362	384.119	1.32373224243441	[M+H]+	473.358;123.117;124.039;143.107;437.343	1.52426e+07
Psoralen	phenylpropanoids(苯丙素类)	Coumarins and derivatives(香豆素及其衍生物类)	1	O=C1OC2=CC3=C(C=CO3)C=C2C=C1	C11H6O3	187.039	239.821	0.910055436995441	[M+H]+	187.04;131.049;145.101;143.049;115.055	1.51852e+07
Cuminaldehyde			1	[H]C(=O)C1=CC=C(C=C1)C(C)C	C10H12O	149.096	64.2752	3.13525956026942	[M+H]+	149.095;150.09;121.065;131.085;93.07	1.4934e+07
Scoparone	phenylpropanoids(苯丙素类)	coumarins(香豆素类)	0.973061	COC1=C(C=C2C(=C1)C=CC(=O)O2)OC	C11H10O4	207.066	164.419	3.05966688977846	[M+H]	207.064;151.076;179.07;192.043;161.097	1.49263e+07
Curcolone			0.788909	CC1=COC2=C1C(=O)C1=C(C)CCC(O)C1(C)C2	C15H18O3	247.133	53.7071	0.195222161505741	[M+H]+	229.121;247.134;121.102;201.127;173.133	1.48203e+07
5'-(furan-3-yl)-4a-hydroxy-4,7-dimethylspiro[5,6,7,8a-tetrahydro-1H-naphthalene-8,3'-oxolane]-2,2'-dione	terpenoids(萜类)	cyclogeraniane(环香叶烷型单萜类);secoiridoid(裂环环烯醚萜类);lavandulane(薰衣草烷型单萜类);mycrane_monoterpenoids(月桂烷型单萜类)	0.639489	O=C1OC(C2=COC=C2)CC13C(C)CCC4(O)C(=CC(=O)CC43)C	C19H22O5	331.155	110.192	2.83622237125146	[M+H]+	151.076;137.059;287.126;189.093;285.114	1.47328e+07
Epinepetalactone			0.600209	CC1CCC2C1C(=O)OC=C2C	C10H14O2	167.107	115.166	1.66305915485372	[M+H]+	167.105;107.085;43.018;149.095;121.102	1.46911e+07
(+/-)-Jasmonic acid	Fatty acids(脂肪酸类)		0.725939	CCC=CCC1C(CCC1=O)CC(=O)O	C12H18O3	211.133	157.83	0.61491284235668	[M+H]+	211.133;193.122;81.07;165.127;151.112	1.46678e+07
Mangiferonic acid	terpenoids(萜类)	cyclogeraniane(环香叶烷型单萜类);iridoid(环戊烷环烯醚萜类);lavandulane(薰衣草烷型单萜类);artemisane(蒿烷型单萜类);mycrane_monoterpenoids(月桂烷型单萜类);menthane_monoterpenoids(薄荷烷型单萜类);secoiridoid(裂环环烯醚萜类)	0.960622	CC(CC\C=C(/C)C(O)=O)C1CCC2(C)C3CCC4C5(CC35CCC12C)CCC(=O)C4(C)C	C30H46O3	455.353	447.878	0.148114309176097	[M+H]+	455.248;437.344;95.085;107.086;109.101	1.46471e+07
Tanshinone IIA	terpenoids(萜类)		0.953001	CC1=COC2=C1C(=O)C(=O)C3=C2C=CC4=C3CCCC4(C)C	C19H18O3	295.133	614.312	1.25236281318797	[M+H]	295.135;277.12;249.127;252.08;266.094	1.4577e+07
7-Methoxy-4-methylcoumarin	phenylpropanoids(苯丙素类)	coumarins(香豆素类)	0.676568	CC1=CC(=O)OC2=C1C=CC(=C2)OC	C11H10O3	191.071	55.8695	0.797203915955868	[M+H]	191.071;159.045;131.049;103.054;163.077	1.45425e+07
Gibberellin A19	terpenoids(萜类)	Pharbitis Nil(牵牛子);Persicae Semen(桃仁)	1	CC1(CCCC2(C=O)C3CCC4(O)CC3(CC4=C)C(C12)C(O)=O)C(O)=O	C20H26O6	361.166	222.175	0.098739016128905	[M-H]-	361.171;362.161;115.003;71.014;328.129	1.44407e+07
Cyclo(leucylprolyl)			0.915827	O=C1NC(C(=O)N2CCCC12)CC(C)C	C11H18N2O2	211.144	86.6032	1.23366226676277	[M+H]+	211.144;86.097;70.064;183.148;98.06	1.43259e+07
Zizyberanalic acid	terpenoids(萜类)	cyclogeraniane(环香叶烷型单萜类);secoiridoid(裂环环烯醚萜类);mycrane_monoterpenoids(月桂烷型单萜类);menthane_monoterpenoids(薄荷烷型单萜类);iridoid(环戊烷环烯醚萜类);lavandulane(薰衣草烷型单萜类);artemisane(蒿烷型单萜类)	0.999398	CC(=C)C1CCC2(CCC3(C)C(CCC4C3(C)CCC5C(C)(C)C(O)C(C=O)C45C)C12)C(O)=O	C30H46O4	471.346	365.556	1.39117987436572	[M+H]+	471.349;52.373;472.347;189.164;317.212	1.4269e+07
Capsaicin	alkaloid(生物碱)		0.901243	CC(C)C=CCCCCC(=O)NCC1=CC(=C(C=C1)O)OC	C18H27NO3	306.207	76.4093	0.67888413685709	[M+H]	306.206;218.116;307.212;70.065;170.017	1.42232e+07
Glyurallin A			0.771413	COC1=C(CC=C(C)C)C(O)=CC2=C1C1=C(CO2)C2=C(O1)C=C(O)C=C2	C21H20O5	353.139	426.263	3.02429630371299	[M+H]+	353.139;297.074;267.066;354.145;295.062	1.38896e+07
Oleanane -4H, + 2O	terpenoids(萜类)	cyclogeraniane(环香叶烷型单萜类);mycrane_monoterpenoids(月桂烷型单萜类);menthane_monoterpenoids(薄荷烷型单萜类);lavandulane(薰衣草烷型单萜类);artemisane(蒿烷型单萜类);secoiridoid(裂环环烯醚萜类)	0.61108	OCC2(C)(C(O)CCC3(C)(C4CC=C1C5CC(C=CC5(C)(CCC1(C)C4(C)(CCC23)))(C)C))	C30H48O2	441.373	444.551	0.24301467926533	[M+H]+	441.368;109.101;95.085;121.102;423.364	1.3418e+07
Isoliquiritigenin	flavonoids(黄酮类)	chalcones(查尔酮类)	0.998648	C1=CC(=CC=C1C=CC(=O)C2=C(C=C(C=C2)O)O)O	C15H12O4	257.082	68.2126	2.08267000637513	[M+H]	257.079;137.023;147.045;258.147;133.064	1.3212e+07
4-Methylumbelliferone	phenylpropanoids(苯丙素类)	Boswellia(乳香)	0.761043	CC1=CC(=O)OC2=C1C=CC(=C2)O	C10H8O3	175.041	118.399	3.09740628822452	[M-H]	175.041;147.046;158.038;174.033;157.029	1.2979e+07
6-O-Methylcodeine	alkaloid(生物碱)	isoquinolines_3(异喹啉类生物碱);piperidines(哌啶类生物碱)	0.860076	COC1C=CC2C3CC4=C5C(OC1C25CCN3C)=C(OC)C=C4	C19H23NO3	314.175	44.6166	2.8092111056881	[M+H]+	314.175;58.065;107.049;269.116;315.175	1.28947e+07
Caffeic acid	phenylpropanoids(苯丙素类)	penyipropionic acid(苯丙酸类)	0.939018	O=C(O)C=CC1=CC=C(O)C(O)=C1	C9H8O4	181.049	148.516	2.83132057646503	[M+H]+	163.039;135.045;181.051;144.097;145.029	1.26728e+07
4-hydroxyfuro[3,2-g]chromen-7-one	phenylpropanoids(苯丙素类)	Coumarins and derivatives(香豆素及其衍生物类)	1	Oc1c2ccoc2cc3oc(=O)ccc13	C11H6O4	203.034	139.64	1.01475115041761	[M+H]+	203.035;147.045;145.101;119.086;204.039	1.26581e+07
Semilicoisoflavone B	flavonoids(黄酮类)	isoflavones(异黄酮类)	0.717334	CC1(C)Oc2c(O)cc(cc2C=C1)c3coc4cc(O)cc(O)c4c3=O	C20H16O6	353.102	488.998	1.07060179403613	[M+H]+	353.1;311.056;354.105;153.018;299.058	1.25966e+07
3,8-dihydroxy-3,8-dimethyl-5-propan-2-ylidene-1,2,3a,4,7,8a-hexahydroazulen-6-one	terpenoids(萜类)	secoiridoid(裂环环烯醚萜类);mycrane_monoterpenoids(月桂烷型单萜类);iridoid(环戊烷环烯醚萜类)	0.97637	O=C1C(=C(C)C)CC2C(CCC2(O)C)C(O)(C)C1	C15H24O3	275.161	217.994	2.21379559146255	[M+Na]+	275.164;276.164;133.101;147.117;105.07	1.25175e+07
Plathymenin	flavonoids(黄酮类)	Spatholobus Suberectus Dunn(鸡血藤)	0.852598	O=C1C2=CC(O)=C(O)C=C2OC(C3=CC=C(O)C(O)=C3)C1	C15H12O6	287.056	194.628	1.00129939377123	[M-H]-	151.004;135.044;287.056;107.014;65.004	1.2483e+07
Ginsenoside Rf	terpenoids(萜类)	Panax Japonicus(竹节参);Panax Japonicus(竹节人参);Panax Ginseng(人参芦);Panax Ginseng(人参叶);Panax Ginseng(人参花蕾);Panax Ginseng(人参);Codonopsis Convolvulacea(珠子参);Codonopsis Convolvulacea(鸡蛋参);Panax Quinquefolium(西洋参);Panax Quinquefolium(西洋参茎叶);Ginseng Radix Rubra(红参);Panax Pseudo-Ginseng(假人参)	0.792991	CC(C)=CCCC(C)(O)C1CCC2(C)C1C(O)CC1C3(C)CCC(O)C(C)(C)C3C(CC21C)OC1OC(CO)C(O)C(O)C1OC1OC(CO)C(O)C(O)C1O	C42H72O14	845.49	295.935	1.41815835699692	[M+HCOO]-	799.498;799.525;101.025;800.503;475.383	1.24547e+07
3-propan-2-yl-2,3,6,7,8,8a-hexahydropyrrolo[1,2-a]pyrazine-1,4-dione			0.810563	CC(C)C1NC(=O)C2CCCN2C1=O	C10H16N2O2	197.128	51.6049	2.88814628144237	[M+H]+	197.13;72.081;70.064;169.134;98.06	1.24413e+07
Naringenin-7-O-glucoside	flavonoids(黄酮类)	flavanones(二氢黄酮类);dihydrochalcones(二氢查尔酮类)	0.958978	O=C3C4=C(O)C=C(OC1OC(CO)C(O)C(O)C1(O))C=C4(OC(C2=CC=C(O)C=C2)C3)	C21H22O10	435.129	50.0703	0.465613081075167	[M+H]+	273.077;153.018;147.045;274.082;195.029	1.22822e+07
3-Hydroxytyramine			0.751454	OC1=CC=C(C=C1O)CCN	C8H11NO2	154.087	114.659	3.69696420186358	[M+H]+	136.076;154.085;87.044;68.049;43.018	1.2263e+07
Schidigerasaponin D3	terpenoids(萜类);steroidal saponin(甾体皂苷类)	cyclogeraniane(环香叶烷型单萜类);secoiridoid(裂环环烯醚萜类);spirostanols(螺甾烷醇类);mycrane_monoterpenoids(月桂烷型单萜类);menthane_monoterpenoids(薄荷烷型单萜类);iridoid(环戊烷环烯醚萜类);lavandulane(薰衣草烷型单萜类);artemisane(蒿烷型单萜类);isospirostanols(异螺甾烷醇类)	0.885384	CC1C2C(CC3C4CCC5CC(CCC5(C)C4CCC23C)OC2OC(CO)C(O)C(OC3OC(CO)C(O)C(O)C3O)C2OC2OC(CO)C(O)C(O)C2O)OC11CCC(C)CO1	C45H74O18	903.497	235.532	7.87095166522519	[M+H]+	903.51;903.477;255.209;741.453;273.223	1.22266e+07
4-Coumaryl alcohol			0.851395	OC\C=C\C1=CC=C(O)C=C1	C9H10O2	151.076	79.2983	1.78165975761651	[M+H]+	151.075;123.081;43.018;81.07;95.086	1.22143e+07
Biochanin A	flavonoids(黄酮类)	Cotoneaster Pannosus(毡毛栒子);Trigonella Foenum-Graecum(葫芦巴);Trigonella Foenum-Graecum(胡芦巴);Trigonella Foenum-Graecum(胡卢巴);Astragalus Membranaceus(黄芪);Astragalus Membranaceus(膜荚黄耆);Citrus Wilsonii(香橼);Spatholobus Suberectus Dunn(鸡血藤);Sojae Semen Praeparatum(淡豆豉);Lethariella Cladonioides(红车轴草);Pueraria Lobata(粉葛);Pueraria Lobata(葛根);Pueraria Lobata(野葛);Pueraria Lobata(葛);Trifolium Subterraneum(地下车轴草)…	0.9068	COC1=CC=C(C=C1)C1=COC2=CC(O)=CC(O)=C2C1=O	C16H12O5	283.061	96.5231	0.393772818748752	[M-H]-	268.039;283.063;255.028;136.989;191.106	1.22046e+07
p-Mentha-1,3,5,8-tetraene			0.913491	CC(=C)C1=CC=C(C)C=C1	C10H12	133.101	100.663	2.49884682229954	[M+H]+	133.101;105.07;134.059;74.024;91.054	1.21911e+07
Cafestol	terpenoids(萜类)	cyclogeraniane(环香叶烷型单萜类);lavandulane(薰衣草烷型单萜类);artemisane(蒿烷型单萜类);mycrane_monoterpenoids(月桂烷型单萜类);menthane_monoterpenoids(薄荷烷型单萜类);secoiridoid(裂环环烯醚萜类)	0.701295	CC12CCC3=C(C1CCC45C2CCC(C4)C(C5)(CO)O)C=CO3	C20H28O3	317.211	162.738	0.66889034732408	[M+H]+	317.212;119.085;299.2;133.101;95.086	1.21758e+07
Apigenin	flavonoids(黄酮类)	Coriandrum Sativum(胡荽);Coriandrum Sativum(胡荽子);Coriandrum Sativum(芫荽);Ban-Lan-Gen(板蓝根);Citri Grandis Exocarpium(化橘红);Chrysanthemum Boreale(北野菊);Chrysanthemum Boreale(甘野菊);Humulus Japonicus(葎草);Lonicera Japonica(金银花);Lonicera Japonica(忍冬藤);Portulaca Grandiflora(半枝莲);Portulaca Grandiflora(大花马齿苋);Chrysanthemum Morifolium(菊花);Garcinia Dulcis(甜山竹子);Garcinia Dulcis(爪哇凤果);Bombax Ceiba(木棉花);Eclipta Prost…	0.999986	C1=CC(=CC=C1C2=CC(=O)C3=C(C=C(C=C3O2)O)O)O	C15H10O5	269.046	447.704	2.77014223423243	[M-H]	269.048;225.054;270.047;241.053;197.059	1.21607e+07
Orcinol	Phenols(酚类)	Parmelia Tinctorum(梅衣);Erica Arborea(欧石南);Erica Arborea(白欧石楠);Erica Umbellata(伞形欧石南);Curculigo Orchioides(仙茅);Rhododendron Dauricum(满山红);Rumex Patientia(牛西西);Rumex Patientia(巴天酸模)	0.827947	OC=1C=C(O)C=C(C1)C	C7H8O2	123.045	40.1133	1.37959984401147	[M-H]-	123.046;95.014;108.022;124.04;122.038	1.19426e+07
1a,5,7a-Trimethyl-2,2a,6,6a,7a,8,9,9a-octahydrobisoxireno[4,5:8,9]cyclodeca[1,2-b]furan-4(1aH)-one	terpenoids(萜类)	mycrane_monoterpenoids(月桂烷型单萜类)	0.866175	CC\1=C2/CC3OC3(C)CCC4OC4(C)CC2OC1=O	C15H20O4	265.143	123.805	2.17313825368714	[M+H]+	265.143;247.133;229.121;201.128;205.121	1.1791e+07
2-(3,7-Dimethyl-2,6-octadienyl)-4-hydroxy-6-methoxyacetophenone			0.991364	COC1=C(C(C)=O)C(C\C=C(/C)CCC=C(C)C)=CC(O)=C1	C19H26O3	303.195	426.86	2.50109998701151	[M+H]+	303.198;285.185;179.07;304.196;151.04	1.17657e+07
7-hydroxy-1,4a-dimethyl-9-oxo-7-propan-2-yl-2,3,4,4b,5,6,10,10a-octahydrophenanthrene-1-carboxylic acid	terpenoids(萜类)	cyclogeraniane(环香叶烷型单萜类);lavandulane(薰衣草烷型单萜类);artemisane(蒿烷型单萜类);mycrane_monoterpenoids(月桂烷型单萜类);secoiridoid(裂环环烯醚萜类)	0.973111	O=C(O)C1(C)CCCC2(C)C3C(=CC(O)(CC3)C(C)C)C(=O)CC12	C20H30O4	335.22	426.86	1.36837864608447	[M+H]+	335.222;336.226;233.154;317.212;121.102	1.16777e+07
1-Naphthalenecarboxylic acid, 5-[2-(2,5-dihydro-2-oxo-3-furanyl)ethyl]decahydro-1,4a-dimethyl-6-methylene-	terpenoids(萜类)	artemisane(蒿烷型单萜类);mycrane_monoterpenoids(月桂烷型单萜类);secoiridoid(裂环环烯醚萜类);cyclogeraniane(环香叶烷型单萜类)	0.703819	CC12CCCC(C)(C1CCC(=C)C2CC/C3=C/COC3=O)C(O)=O	C20H28O4	333.205	435.087	2.64087684772039	[M+H]+	333.205;334.209;315.194;88.076;57.07	1.15716e+07
4-Hydroxybenzoic acid	Phenols(酚类)		0.905022	OC(=O)C1=CC=C(O)C=C1	C7H6O3	139.039	416.604	1.12917094666401	[M+H]+	139.039;121.028;65.038;140.106;111.045	1.14517e+07
Eleutheroside E	phenylpropanoids(苯丙素类)	Caulis Sinomenii(青风藤);Tripterygium Wilfordii(雷公藤)	0.814288	COC1=CC(=CC(OC)=C1OC1OC(CO)C(O)C(O)C1O)C1OCC2C1COC2C1=CC(OC)=C(OC2OC(CO)C(O)C(O)C2O)C(OC)=C1	C34H46O18	787.267	76.8267	0.309284818755945	[M+HCOO]-	417.153;181.05;579.205;166.026;418.157	1.12722e+07
p-Hydroxybenzaldehyde	Phenols(酚类)		0.945872	C1=CC(=CC=C1C=O)O	C7H6O2	123.044	108.572	1.13520150865698	[M+H]	123.043;95.049;124.039;81.07;67.055	1.12023e+07
Guan-fu base Y	terpenoids(萜类);alkaloid(生物碱)	indolizidines(吲哚里西啶类生物碱);artemisane(蒿烷型单萜类);mycrane_monoterpenoids(月桂烷型单萜类);menthane_monoterpenoids(薄荷烷型单萜类);tropines(托品类生物碱);piperidines(哌啶类生物碱);cyclogeraniane(环香叶烷型单萜类);quinolizidines(喹诺里西啶类生物碱);secoiridoid(裂环环烯醚萜类);iridoid(环戊烷环烯醚萜类);lavandulane(薰衣草烷型单萜类)	1	CC(=O)OC1CC2(C)CN3C4CC56CC(=C)C7C(O)C5C(C1)(C24)C3C6(O)C7O	C22H29NO5	388.212	575.882	0.828966736654709	[M+H]+	388.25;389.124;370.238;359.078;66.903	1.11787e+07
Wogonin	flavonoids(黄酮类)	flavones(黄酮类)	0.999258	COC1=C(O)C=C(O)C2=C1OC(=CC2=O)C1=CC=CC=C1	C16H12O5	285.076	243.317	1.88571647924691	[M+H]+	285.075;270.052;286.078;249.146;257.045	1.11701e+07
Vanillic acid	Organic acids and derivatives(有机酸及其衍生物)	Hordei Fructus Germinatus(麦芽);Euchresta Japonica(山豆根);Euchresta Japonica(三小叶山豆根);Casearia Membranacea(膜质脚骨脆);Casearia Membranacea(膜叶脚骨脆);Imperata Cylindrica Var. Major(茅草叶);Imperata Cylindrica Var. Major(白茅);Imperata Cylindrica Var. Major(白茅根);Semiaquilegiae Radix(天葵子);Coriolus Versicolor(云芝);Actinidia Chinensis(猕猴桃);Cactaceae(仙人掌);Plantago Asiatica(车前);Plantago Asiatica(植物车前);Plantago Asiatica(车…	0.812939	COc1cc(ccc1O)C(=O)O	C8H8O4	167.035	61.3887	0.0242287431183286	[M-H]-	152.011;123.046;167.034;108.022;95.013	1.1129e+07
6beta-Hydroxy-3-oxo-12-oleanen-28-oic acid	terpenoids(萜类)	secoiridoid(裂环环烯醚萜类);mycrane_monoterpenoids(月桂烷型单萜类);menthane_monoterpenoids(薄荷烷型单萜类);lavandulane(薰衣草烷型单萜类);artemisane(蒿烷型单萜类);cyclogeraniane(环香叶烷型单萜类)	0.990853	CC1(C)CCC2(CCC3(C)C(=CCC4C5(C)CCC(=O)C(C)(C)C5C(O)CC34C)C2C1)C(O)=O	C30H46O4	471.347	337.808	0.399876328134026	[M+H]+	471.349;52.373;135.117;189.164;472.347	1.1103e+07
Gibberellin A61	terpenoids(萜类)	cyclogeraniane(环香叶烷型单萜类);secoiridoid(裂环环烯醚萜类);iridoid(环戊烷环烯醚萜类);lavandulane(薰衣草烷型单萜类);artemisane(蒿烷型单萜类);mycrane_monoterpenoids(月桂烷型单萜类);menthane_monoterpenoids(薄荷烷型单萜类)	0.7719	CC12CCC(O)C3(OC1=O)C1CCC4CC1(CC4=C)C(C23)C(O)=O	C19H24O5	333.17	342.641	0.92845161267263	[M+H]+	333.168;287.162;269.155;315.16;251.142	1.10392e+07
6-methoxy-7-(3-methylbut-2-enoxy)chromen-2-one	phenylpropanoids(苯丙素类)	coumarins(香豆素类)	1	O=C1OC=2C=C(OCC=C(C)C)C(OC)=CC2C=C1	C15H16O4	299.069	532.98	1.88445617046536	[M+K]+	299.064;300.066;298.308;284.066;281.185	1.10375e+07
Licoflavone A	flavonoids(黄酮类)	flavones(黄酮类)	0.991097	CC(=CCC1=CC2=C(C=C1O)OC(=CC2=O)C3=CC=C(C=C3)O)C	C20H18O4	323.126	370.648	0.955606964636336	[M+H]	323.128;267.066;324.127;167.035;268.07	1.10198e+07
Ginsenoside Rh3	terpenoids(萜类)	cyclogeraniane(环香叶烷型单萜类);mycrane_monoterpenoids(月桂烷型单萜类);menthane_monoterpenoids(薄荷烷型单萜类);iridoid(环戊烷环烯醚萜类);lavandulane(薰衣草烷型单萜类);artemisane(蒿烷型单萜类);secoiridoid(裂环环烯醚萜类)	0.704194	CC(C)=CCC=C(C)C1CCC2(C)C1C(O)CC1C3(C)CCC(OC4OC(CO)C(O)C(O)C4O)C(C)(C)C3CCC21C	C36H60O7	605.443	361.323	2.65024938759461	[M+H]+	605.45;189.165;95.086;109.101;135.117	1.09925e+07
Genistein	flavonoids(黄酮类)	Bolusanthus Speciosus(非洲树紫藤/非洲紫藤木);Iridis Tectori Rhizoma(川射干);Hedyotis Corymbosa(水线草);Hedyotis Corymbosa(伞房花耳草);Sojae Semen Praeparatum(淡豆豉);Belamcanda Chinensis(射干);Pueraria Lobata(粉葛);Pueraria Lobata(葛根);Pueraria Lobata(野葛);Pueraria Lobata(葛);Glycine Max(酱);Glycine Max(大豆);Glycine Max(豆油);Glycine Max(毛豆);Glycine Max(黑大豆);Piptanthus Concolor(黄花木);Tephrosia Toxicaria(毒灰毛豆);Eucommia Ulmoides(杜仲叶)…	0.978978	OC1=CC=C(C=C1)C1=COC2=CC(O)=CC(O)=C2C1=O	C15H10O5	269.045	186.864	0.351813578733964	[M-H]-	269.138;141.093;57.034;59.013;85.067	1.08916e+07
Aloin			0.719747	OCC1OC(C(O)C(O)C1O)C1C2=C(C(O)=CC=C2)C(=O)C2=C1C=C(CO)C=C2O	C21H22O9	419.134	428.87	0.644217810942459	[M+H]+	419.132;389.088;404.115;361.096;346.067	1.08874e+07
2-Propylphenol			0.910139	CCCC1=CC=CC=C1O	C9H12O	137.096	161.613	2.29112125334182	[M+H]+	137.096;122.072;43.018;109.101;81.07	1.08271e+07
Casticin	flavonoids(黄酮类)	Artemisia Capillaris(茵陈蒿);Vitex Negundo Var. Cannabifolia(牡荆叶);Vitex Negundo Var. Cannabifolia(牡荆子);Chrysosplenium Japonicum(日本金腰);Artemisia Annua(黄花蒿);Chrysosplenium Tosaense(上佐州金腰);Euphorbia Lathyris(续随子茎中白汁);Euphorbia Lathyris(续随子 (大戟属));Euphorbia Lathyris(千金子);Digitalis Thapsi(萨氏毛地黄);Matricaria Chamomilla(母菊);Vitex Negundo(黄荆叶);Vitex Negundo(黄荆);Vitex Negundo(牧荆);Vitex Negundo(黄荆种子);Vitex Rot…	0.688782	COC1=C(C=C(C=C1)C2=C(C(=O)C3=C(C(=C(C=C3O2)OC)OC)O)OC)O	C19H18O8	373.092	375.024	2.15409969965694	[M-H]	373.095;343.044;358.068;328.023;300.029	1.06831e+07
Thymol	Phenols(酚类)		0.760952	OC1=CC(=CC=C1C(C)C)C	C10H14O	151.112	137.085	1.99423377989444	[M+H]+	151.111;109.065;43.018;81.07;123.081	1.06029e+07
4-Ethylphenol			0.999805	CCC1=CC=C(O)C=C1	C8H10O	123.081	179.531	3.26772195759682	[M+H]+	123.043;95.049;124.039;81.07;67.054	1.05876e+07
Abscisic acid	terpenoids(萜类)	Dioscorea Batatas(山药);Microctis Folium(布渣);Pisum Sativum(豌豆);Abrus Precatorius(相思藤);Gossypium Hirsutum(陆地棉)	0.844994	CC1=CC(=O)CC(C1(C=CC(=CC(=O)O)C)O)(C)C	C15H20O4	263.128	250.2	1.97294545356896	[M-H]	263.128;219.137;123.082;83.05;201.127	1.05707e+07
Naringenin chalcone	flavonoids(黄酮类)	chalcones(查尔酮类)	0.980426	C1=CC(=CC=C1C=CC(=O)C2=C(C=C(C=C2O)O)O)O	C15H12O5	273.076	173.165	1.1842103699689	[M+H]	273.077;153.018;147.045;119.05;274.077	1.02955e+07
alpha-Irone			0.747557	CC1CC=C(C)C(\C=C\C(C)=O)C1(C)C	C14H22O	207.174	206.924	0.559074045235603	[M+H]+	207.175;189.164;135.117;147.117;133.101	1.02009e+07
Emodin	quinones(醌类)		1	Cc1cc(O)c2c(c1)C(=O)c1cc(O)cc(O)c1C2=O	C15H10O5	269.046	269.167	2.59951533729087	[M-H]-	269.048;197.06;270.047;225.058;171.046	1.01127e+07
Ganoderic acid Y	terpenoids(萜类)	cyclogeraniane(环香叶烷型单萜类);secoiridoid(裂环环烯醚萜类);mycrane_monoterpenoids(月桂烷型单萜类);iridoid(环戊烷环烯醚萜类);lavandulane(薰衣草烷型单萜类);artemisane(蒿烷型单萜类)	0.67152	CC(CC\C=C(/C)C(O)=O)C1CCC2(C)C3=CCC4C(C)(C)C(O)CCC4(C)C3=CCC12C	C30H46O3	455.352	848.179	0.934247143726268	[M+H]+	455.353;109.101;95.086;121.102;437.343	1.00959e+07
5,7-dihydroxy-2-(4-hydroxyphenyl)-6-[3,4,5-trihydroxy-6-(hydroxymethyl)oxan-2-yl]chromen-4-one	flavonoids(黄酮类)	flavones(黄酮类)	0.863032	O=C1C=C(OC2=CC(O)=C(C(O)=C12)C3OC(CO)C(O)C(O)C3O)C=4C=CC(O)=CC4	C21H20O10	433.114	140.742	0.159362710571126	[M+H]+	271.062;272.061;433.106;432.347;70.065	1.00577e+07
Maltol	flavonoids(黄酮类)		0.991554	O=C1C=COC(=C1O)C	C6H6O3	127.039	262.213	1.11665031673441	[M+H]+	127.038;43.018;109.028;128.071;111.091	9.94038e+06
Quercetin-3-O-glucuronide	flavonoids(黄酮类)	Dispyros Rhombifolia(老鸦柿);Adiantum Capillus-Veneris(猪鬃草);Koelreuteria Paniculata(栾树);Koelreuteria Paniculata(栾华)	1	OC1C(O)C(OC2=C(OC3=CC(O)=CC(O)=C3C2=O)C2=CC=C(O)C(O)=C2)OC(C1O)C(O)=O	C21H18O13	477.067	83.6515	2.17458852812154	[M-H]-	301.036;477.193;87.009;73.029;71.014	9.91643e+06
p-Mentha-1,3,8-triene			0.990061	CC(=C)C1=CC=C(C)CC1	C10H14	135.117	76.4093	0.721591114693357	[M+H]+	135.117;107.085;136.063;93.07;91.054	9.90131e+06
4-[(E)-3-[1-carboxy-2-(3,4-dihydroxyphenyl)ethoxy]-3-oxoprop-1-enyl]-2-(3,4-dihydroxyphenyl)-7-hydroxy-2,3-dihydro-1-benzofuran-3-carboxylic acid	phenylpropanoids(苯丙素类)	penyipropionic acid(苯丙酸类)	0.759162	O=C(OC(C(=O)O)CC1=CC=C(O)C(O)=C1)C=CC2=CC=C(O)C=3OC(C4=CC=C(O)C(O)=C4)C(C(=O)O)C23	C27H22O12	539.12	97.1204	2.06265267653603	[M+H]+	279.068;297.074;323.058;233.061;281.043	9.82826e+06
Isoanhydroicaritin	flavonoids(黄酮类)	Sophora Flavescens(苦参);Euphorbia Pekinensis(京大戟);Euphorbia Pekinensis(大戟);Scutellaria Lateriflora(黄苓)	0.870354	CC(=CCC1=C(C=C(C2=C1OC(=C(C2=O)O)C3=CC=C(C=C3)O)O)OC)C	C21H20O6	367.119	354.554	1.68793646474193	[M-H]	367.12;309.038;298.048;283.023;368.119	9.65463e+06
(+)-Alantolactone	terpenoids(萜类)	mycrane_monoterpenoids(月桂烷型单萜类);artemisane(蒿烷型单萜类)	0.895234	CC1CCCC2(C1=CC3C(C2)OC(=O)C3=C)C	C15H20O2	233.154	482.837	1.31455941091727	[M+H]+	233.155;215.142;187.147;151.076;177.092	9.63674e+06
Pomonic acid	terpenoids(萜类)	secoiridoid(裂环环烯醚萜类);lavandulane(薰衣草烷型单萜类);artemisane(蒿烷型单萜类);mycrane_monoterpenoids(月桂烷型单萜类);menthane_monoterpenoids(薄荷烷型单萜类);cyclogeraniane(环香叶烷型单萜类)	0.775148	CC1CCC2(CCC3(C)C(=CCC4C5(C)CCC(=O)C(C)(C)C5CCC34C)C2C1(C)O)C(O)=O	C30H46O4	471.347	446.222	0.679223570872866	[M+H]+	471.349;453.34;295.244;435.33;173.133	9.58614e+06
Isovanillic acid	Phenols(酚类)		0.74829	COC1=C(C=C(C=C1)C(=O)O)O	C8H8O4	169.05	60.8604	0.591142301629575	[M+H]	169.076;111.045;125.061;65.039;134.059	9.58474e+06
Isokobusone	terpenoids(萜类)	Cyperus Rotundus(香附);Actinidia Polygama(木天蓼)	1	CC1(C)CC2C1CCC(=C)C(O)CCC2=O	C14H22O2	221.155	403.78	1.60191940280908	[M-H]-	221.153;222.159;220.145;59.014;164.083	9.49028e+06
Irigenin	flavonoids(黄酮类)	Belamcanda Chinensis(射干)	0.967397	COC1=CC(=CC(=C1OC)O)C2=COC3=C(C2=O)C(=C(C(=C3)O)OC)O	C18H16O8	359.078	185.064	1.84735999397575	[M-H]	135.046;271.099;161.025;359.209;197.046	9.48759e+06
Leonurine	alkaloid(生物碱)		0.984079	COC1=CC(=CC(=C1O)OC)C(=O)OCCCCN=C(N)N	C14H21N3O5	312.155	76.4093	1.76364472225289	[M+H]	312.159;181.051;72.08;114.102;97.076	9.37161e+06
skullcapflavone II	flavonoids(黄酮类)	Scutellaria Baicalensis(黄芩);Scutellaria Baicalensis(黄岑);Scutellaria Viscidula(粘毛黄芩);Scutellaria Viscidula(黏毛黄芩);Scutellaria Amoena(滇黄芩)	0.637832	O=C1C=C(OC2=C(OC)C(OC)=C(OC)C(O)=C12)C=3C(O)=CC=CC3OC	C19H18O8	373.093	204.177	0.153315650022051	[M-H]-	135.044;179.034;193.05;134.038;136.049	9.25487e+06
Sinapoylhexoside	phenylpropanoids(苯丙素类)	penyipropionic acid(苯丙酸类)	0.698921	O=C(OC1OC(CO)C(O)C(O)C1(O))C=CC=2C=C(OC)C(O)=C(OC)C=2	C17H22O10	387.203	63.7	1.86787858552646	[M+H]+	207.139;95.086;387.151;225.151;123.081	9.18121e+06
alpha-Hydrojuglone 4-O-b-D-glucoside			0.676156	OCC1OC(OC2=C3C(O)=CC=CC3=C(O)C=C2)C(O)C(O)C1O	C16H18O8	339.108	221.002	0.602971216517929	[M+H]+	177.055;145.028;321.094;186.055;339.108	9.16552e+06
Azelaic acid	Aliphatic acyl(脂肪酰类)	Hibiscus Syriacus(木槿皮);Hibiscus Syriacus(木槿子);Hibiscus Syriacus(木槿花);Angelica Sinensis(当归);Artemisia Capillaris(茵陈蒿);Codonopsis Pilosula(党参);Codonopsis Pilosula(素花党参);Ampelopsis Japonica(白薇);Ampelopsis Japonica(白蔹);Schnabelia Tetrodonta(四齿四棱草);Brucea Javanica(鸦胆子);Artemisia Scoparia(黄蒿);Artemisia Scoparia(植物滨蒿)	0.814794	O=C(O)CCCCCCCC(=O)O	C9H16O4	187.098	139.173	3.2561252522096	[M-H]-	125.097;187.097;97.066;123.082;57.034	9.10169e+06
Furostane base -1H2O + 1O, O-Hex, O-Hex-Hex	terpenoids(萜类)		0.957659	OCC8OC(OCC(C)CCC=4OC5CC6C7CCC3CC(OC2OC(CO)C(O)C(O)C2(OC1OC(CO)C(O)C(O)C1(O)))C(O)CC3(C)C7(CCC6(C)(C5(C=4C))))C(O)C(O)C8(O)	C45H74O19	917.476	227.98	2.357324349905	[M-H]-	917.479;917.513;918.516;101.944;113.025	9.00523e+06
Protocatechualdehyde	Phenols(酚类)	Salvia Bowleyana(南丹参);Salvia Flava(黄花鼠尾草);Cinnamomi Ramulus(桂枝);Litchi Chinensis(荔枝核);Litchi Chinensis(荔枝);Salvia Prionitis(红根草);Salvia Yunnanensis(云南鼠尾草);Salvia Digitaloides Diels(毛地黄鼠尾草);Maydis Seigma(玉米须);Ilex Chinensis(四季青);Tripterygium Wilfordii(雷公藤);Phellinus Igniarius(桑黄);Phalaenopsis(蝴蝶兰属);Gastrodia Elata(天麻);Rubus Idaeus(覆盆子);Rubus Idaeus(丹参);Erigeron Breviscapus(灯盏细辛);Erigeron Breviscap…	0.999993	C1=CC(=C(C=C1C=O)O)O	C7H6O3	137.025	42.6666	3.41413502074638	[M-H]	137.024;93.035;138.029;136.016;109.03	8.97372e+06
Asiatic Acid	terpenoids(萜类)	mycrane_monoterpenoids(月桂烷型单萜类);menthane_monoterpenoids(薄荷烷型单萜类);lavandulane(薰衣草烷型单萜类);artemisane(蒿烷型单萜类);secoiridoid(裂环环烯醚萜类);cyclogeraniane(环香叶烷型单萜类)	0.939581	O=C(O)C12CCC(C)C(C)C2C3=CCC4C5(C)CC(O)C(O)C(C)(CO)C5CCC4(C)C3(C)CC1	C30H48O5	511.344	274.389	3.0387484017677	[M+Na]+	511.349;149.132;107.085;451.32;56.817	8.88477e+06
24-Hydroxyglycyrrhetic acid	terpenoids(萜类)	lavandulane(薰衣草烷型单萜类);artemisane(蒿烷型单萜类);mycrane_monoterpenoids(月桂烷型单萜类);menthane_monoterpenoids(薄荷烷型单萜类);secoiridoid(裂环环烯醚萜类);cyclogeraniane(环香叶烷型单萜类)	0.688686	CC12CCC(C)(CC1C1=CC(=O)C3C4(C)CCC(O)C(C)(CO)C4CCC3(C)C1(C)CC2)C(O)=O	C30H46O5	487.341	332.277	2.73514641217201	[M+H]+	487.336;54.15;488.345;317.212;175.147	8.87497e+06
Santene			0.994987	CC1=C(C)C2CCC1C2	C9H14	123.117	277.434	0.0401513503243517	[M+H]+	123.043;95.049;124.039;81.07;67.054	8.87255e+06
Licoricesaponin H2	terpenoids(萜类)	Glycyrrhiza Glabra(光果甘草);Glycyrrhiza Glabra(欧亚甘草);Ligusticum Chuanxiong(川芎);Ligusticum Chuanxiong(香果);Glycyrrhiza Inflata(胀果甘草);Cimicifuga Foetida(升麻);Pueraria Lobata(粉葛);Pueraria Lobata(葛根);Pueraria Lobata(野葛);Pueraria Lobata(葛);Glycyrrhiza Uralensis(甘草);Glycyrrhiza Uralensis(植物甘草);Glycyrrhiza Uralensis(乌拉尔甘草);Glycyrrhiza Aspera(粗毛甘草);Amygdalus Communis(苦杏仁);Glycyrrhiza Kansuensis(黄甘草);Abrus Pre…	0.971036	CC1(C)C(CCC2(C)C1CCC1(C)C2C(=O)C=C2C3CC(C)(CCC3(C)CCC12C)C(O)=O)OC1OC(C(O)C(O)C1OC1OC(C(O)C(O)C1O)C(O)=O)C(O)=O	C42H62O16	821.398	459.666	1.54494590354873	[M-H]-	821.381;351.056;113.025;822.4;193.034	8.83421e+06
1-Methyl-2-pyrrolecarboxaldehyde	alkaloid(生物碱)	pyrrolidines(吡咯类生物碱)	0.897935	CN1C=CC=C1C=O	C6H7NO	110.06	84.9489	1.81164832610811	[M+H]+	110.059;43.018;68.049;42.034;89.507	8.79317e+06
Phenylalanine	Amino acid derivatives(氨基酸衍生物)	Carthamus Tinctorius(红花);Arctium Lappa(牛蒡子);Arctium Lappa(牛蒡根);Arctium Lappa(牛蒡);Arctium Lappa(牛蒡叶);Bamusaeconcretiosilicea(天竺黄);Santalum Album(檀香);Rubus Idaeus(覆盆子);Rubus Idaeus(丹参);Trichosanthes Kirilowii(栝楼子);Atractylodes Macrocephala(白术);Cornus Officinalis(山茱萸);Dioscorea Batatas(山药)	0.622011	O=C(O)C(N)CC1=CC=CC=C1	C9H11NO2	164.072	92.136	2.32759092893307	[M-H]-	120.053;164.07;147.046;72.009;59.014	8.7465e+06
Tangeritin	flavonoids(黄酮类)	flavones(黄酮类)	0.853343	O=C1C=C(OC2=C(OC)C(OC)=C(OC)C(OC)=C12)C=3C=CC(OC)=CC3	C20H20O7	395.11	306.031	1.00801274702558	[M+Na]+	395.109;365.066;396.11;380.085;279.063	8.71825e+06
Linalyl benzoate			0.992853	CC(C)=CCCC(C)(OC(=O)C1=CC=CC=C1)C=C	C17H22O2	259.167	321.596	0.76007554091244	[M+H]+	259.166;260.17;241.088;173.133;159.117	8.69453e+06
Dehydrodiisoeugenol	phenylpropanoids(苯丙素类)	lignans(木脂素类)	0.629495	CC=CC1=CC2=C(C(=C1)OC)OC(C2C)C3=CC(=C(C=C3)O)OC	C20H22O4	327.159	83.861	1.3537652592243	[M+H]	137.059;163.074;133.064;309.042;327.162	8.6527e+06
Ginsenoside Rg3(S-FORM)	terpenoids(萜类)	Ginseng Radix Rubra(红参)	0.984244	CC(C)=CCCC(C)(O)C1CCC2(C)C1C(O)CC1C3(C)CCC(OC4OC(CO)C(O)C(O)C4OC4OC(CO)C(O)C(O)C4O)C(C)(C)C3CCC21C	C42H72O13	783.486	485.482	0.387319827670365	[M-H]-	783.485;783.512;101.025;113.024;784.514	8.58048e+06
Xanyhyletin	phenylpropanoids(苯丙素类)	coumarins(香豆素类)	0.673404	CC1(C)Oc2cc3oc(=O)ccc3cc2C=C1	C14H12O3	229.086	315.701	0.104651373406	[M+H]+	229.088;187.04;143.05;183.116;185.095	8.56235e+06
Casticin	flavonoids(黄酮类)	flavonols(黄酮醇类);flavones(黄酮类)	0.737759	COC1=C(C=C(C=C1)C2=C(C(=O)C3=C(C(=C(C=C3O2)OC)OC)O)OC)O	C19H18O8	375.107	363.888	1.53045157031233	[M+H]	375.109;274.273;211.06;317.064;275.279	8.53913e+06
Sativoside R2	terpenoids(萜类);steroidal saponin(甾体皂苷类)	cyclogeraniane(环香叶烷型单萜类);iridoid(环戊烷环烯醚萜类);lavandulane(薰衣草烷型单萜类);artemisane(蒿烷型单萜类);isospirostanols(异螺甾烷醇类);mycrane_monoterpenoids(月桂烷型单萜类);menthane_monoterpenoids(薄荷烷型单萜类);secoiridoid(裂环环烯醚萜类);spirostanols(螺甾烷醇类)	0.647148	CC1C2C(CC3C4CCC5CC(CCC5(C)C4CCC23C)OC2OC(CO)C(OC3OC(CO)C(O)C(OC4OCC(O)C(O)C4O)C3OC3OC(CO)C(O)C(OC4OC(CO)C(O)C(O)C4O)C3O)C(O)C2O)OC11CCC(C)CO1	C56H92O27	1197.59	306.601	2.81684077378255	[M+H]+	417.335;273.223;579.385;161.132;255.209	8.49379e+06
alpha-Cyperone	terpenoids(萜类)	artemisane(蒿烷型单萜类)	0.948573	CC1=C2CC(CCC2(CCC1=O)C)C(=C)C	C15H22O	219.174	277.581	1.60703867683046	[M+H]+	219.176;159.117;201.165;161.131;145.101	8.46325e+06
Phenethylacetate	Aromaticity(芳香族化合物)		0.909805	O=C(OCCC=1C=CC=CC1)C	C10H12O2	165.091	239.276	0.612032207392102	[M+H]+	165.091;147.045;119.086;43.018;95.086	8.43274e+06
Panaquinquecol 2			1	CCCCCCCC1OC1C(O)C#CC#CC(O)C=C	C17H24O3	277.177	309.326	1.0162096700811	[M+H]+	277.175;278.181;93.07;81.07;259.171	8.42773e+06
Herbacetin	flavonoids(黄酮类)	Ephedra Sinica(麻黄根);Ephedra Sinica(麻黄);Angelica Biserrata(独活);Equisetum Hyemale(木贼);Picrorhiza Kurrooa(胡黄连);Orostachys Fimbriata(瓦松)	0.756361	C1=CC(=CC=C1C2=C(C(=O)C3=C(O2)C(=C(C=C3O)O)O)O)O	C15H10O7	301.035	178.905	1.6027684311682	[M-H]	283.023;119.05;301.074;255.028;139.003	8.42396e+06
Dihydroactinidiolide			0.829986	CC12CCCC(C)(C)C1=CC(=O)O2	C11H16O2	181.122	304.267	2.51582029021018	[M+H]+	181.121;135.117;163.112;121.102;107.085	8.42333e+06
cuminyl alcohol	Prenol lipids(异戊烯醇脂类)		0.959121	OCC1=CC=C(C=C1)C(C)C	C10H14O	133.101	285.746	2.5305477168778	[M+H-H2O]-	133.101;105.07;91.054;134.059;42.034	8.35101e+06
Isorhamnetin	flavonoids(黄酮类)	flavones(黄酮类);flavonols(黄酮醇类)	0.99915	COC1=C(C=CC(=C1)C2=C(C(=O)C3=C(C=C(C=C3O2)O)O)O)O	C16H12O7	317.066	125.455	0.29245080487252	[M+H]	317.063;302.042;318.069;285.04;153.018	8.33517e+06
Hesperidin	flavonoids(黄酮类)	Citri Reticulatae Pericarpium Viride(青皮);Citrus Unshiu,Citrus Sinensis,Citrus Iyo(三种橘杂交种);Capsella Bursa-Pastoris(荠菜子);Echinopslatifoliustausch(禹州漏芦);Galium Mollugo(粟猪殃殃);Mentha Longifolia(欧薄荷);Zanthoxylum Nitidum(两面针);Euonymus Alatus(鬼箭羽);Euonymus Alatus(卫矛);Citrus Chachiensis(柑皮);Vitex Rotundifolia(单叶蔓荆子);Vitex Rotundifolia(蔓荆子);Citrus Limonia(黎檬叶);Citrus Limonia(黎檬根);Citrus Limonia(黎檬);Citrus …	0.622342	CC1C(C(C(C(O1)OCC2C(C(C(C(O2)OC3=CC(=C4C(=O)CC(OC4=C3)C5=CC(=C(C=C5)OC)O)O)O)O)O)O)O)O	C28H34O15	609.184	189.605	0.974347223536696	[M-H]	301.074;609.176;164.01;286.048;325.069	8.2953e+06
Ginsenoside Rg5	terpenoids(萜类)		0.977894	CC(C)=CCC=C(C)C1CCC2(C)C1C(O)CC1C3(C)CCC(OC4OC(CO)C(O)C(O)C4OC4OC(CO)C(O)C(O)C4O)C(C)(C)C3CCC21C	C42H70O12	765.476	578.049	0.602949587921545	[M-H]-	765.476;765.501;101.025;113.024;85.03	8.26037e+06
Methylisoeugenol			0.778025	COC1=C(OC)C=C(\C=C/C)C=C1	C11H14O2	179.107	147.369	0.960066614338687	[M+H]+	179.107;133.102;161.095;107.086;43.018	8.1387e+06
(1beta,4alpha,5alpha,6beta,8alpha,10b)-1,10:4,5-Diepoxy-6-hydroxy-7(11)-germacren-12,8-olide	terpenoids(萜类)	mycrane_monoterpenoids(月桂烷型单萜类)	0.668669	CC1=C2C(CC3(C)OC3CCC3(C)OC3C2O)OC1=O	C15H20O5	281.139	230.567	2.42299738385538	[M+H]+	263.128;149.097;69.034;217.122;235.133	8.12507e+06
Scopoletin	phenylpropanoids(苯丙素类)	Solanum Nigrum(龙葵);Artemisiae Scopariae(茵陈);Lycium Chinese(枸杞);Scopolia Japonica(东莨菪);Herba Sarcandrae(肿节风);Angelica Decursiva(前胡);Angelica Decursiva(紫花前胡);Erigeron Breviscapus(灯盏细辛);Erigeron Breviscapus(短葶飞蓬);Rubia Wallichiana(多花茜草);Solanum Indicum(天茄子);Solanum Indicum(刺天茄);Machilus Thunbergii(红楠皮);Machilus Thunbergii(红楠);Notopterygium Incisum(羌活);Notopterygium Incisum(草本植物羌活);Lycium Chinense(枸杞…	0.884802	O=C1OC=2C=C(O)C(OC)=CC2C=C1	C10H8O4	191.035	940.236	0.739886279567088	[M-H]-	176.013;191.037;102.949;111.009;146.939	8.10706e+06
Wogonin	flavonoids(黄酮类)	Carya Cathayensis(山核桃);Scutellaria Likiangensis(丽江黄芩);Andrographis Paniculata(穿心莲);Physalis Minima(天泡子);Oroxylum Indicum(木蝴蝶树皮);Scutellaria Viscidula(粘毛黄芩);Scutellaria Viscidula(黏毛黄芩);Forsythia Suspensa(连翘);Phellodendron Amurense(关黄柏);Phellodendron Amurense(黄柏(黄檗));Sophora Sp(银柴胡);Scutellaria Hypericifolia(川黄芩);Scutellaria Hypericifolia(连翘叶黄芩);Scutellaria Amoena(滇黄芩);Scutellaria Rehderiana(甘肃黄芩);…	0.998945	COC1=C(O)C=C(O)C2=C1OC(=CC2=O)C1=CC=CC=C1	C16H12O5	283.061	378.615	0.432304616678853	[M-H]-	268.039;283.063;59.014;269.041;284.067	8.09317e+06
Pimelic acid	Fatty acids(脂肪酸类)	Anethum Graveolens(莳萝子);Anethum Graveolens(莳萝属);Ligusticum Scoticum(苏格兰当归);Equisetum Arvense(问荆);Mosla Dianthera(大叶香薷);Mosla Dianthera(小鱼仙草);Castor Bean Latin(蓖麻子);Perilla Frutescens(白苏);Perilla Frutescens(紫苏子);Perilla Frutescens(青紫苏);Perilla Frutescens(紫苏);Perilla Frutescens(白苏子);Perilla Frutescens(苏子);Foeniculum Vulgare(茴香茎叶);Foeniculum Vulgare(小茴香);Foeniculum Vulgare(茴香根);Mosla Formosana(台湾荠苎)…	0.680642	O=C(O)CCCCCC(=O)O	C7H12O4	159.067	82.5364	3.80813830885144	[M-H]-	115.076;159.066;141.056;97.066;130.983	8.05302e+06
3,4-Dimethoxybenzaldehyde	Aromaticity(芳香族化合物)		0.868621	O=CC1=CC=C(OC)C(OC)=C1	C9H10O3	167.07	200.236	2.15083393860417	[M+H]+	167.069;107.085;152.048;43.018;121.1	7.8853e+06
Pseudojervine	alkaloid(生物碱);terpenoids(萜类)	piperidines(哌啶类生物碱);secoiridoid(裂环环烯醚萜类);mycrane_monoterpenoids(月桂烷型单萜类);iridoid(环戊烷环烯醚萜类);lavandulane(薰衣草烷型单萜类);artemisane(蒿烷型单萜类)	0.998143	CC1C2NCC(C)CC2OC11CCC2C3CC=C4CC(CCC4(C)C3C(=O)C2=C1C)OC1OC(CO)C(O)C(O)C1O	C33H49NO8	588.352	152.084	1.96613618242468	[M+H]+	588.345;65.374;589.359;136.076;178.087	7.85812e+06
Gallic acid	Phenols(酚类)	Ailanthi Altissimae(凤眼草);Diospyros Cinnabarina(朱红柿);Canarii Fructus(青果);Coriaria Nepalensis(马桑叶);Liquidambar Formosana Hance(路路通);Herba Pyrolae(鹿衔草);Peucedanum Praeruptorum(白花前胡);Hypocrella Bambusae(竹红菌);Immature Fruit Of Guava(芭乐干);Choerospondiatis Fructus(广枣);Polygoni Orientalis Fructus(水红花子);Orostachys Fimbriata(瓦松);Prinsepiae Nux(蕤仁)	0.922859	C1=C(C=C(C(=C1O)O)O)C(=O)O	C7H6O5	169.014	38.7761	0.957295313446314	[M-H]	125.025;169.015;97.029;69.034;81.035	7.63553e+06
Medicagenic acid	terpenoids(萜类)	secoiridoid(裂环环烯醚萜类);mycrane_monoterpenoids(月桂烷型单萜类);menthane_monoterpenoids(薄荷烷型单萜类);lavandulane(薰衣草烷型单萜类);artemisane(蒿烷型单萜类);cyclogeraniane(环香叶烷型单萜类)	0.672207	CC1(C)CCC2(CCC3(C)C(=CCC4C5(C)CC(O)C(O)C(C)(C5CCC34C)C(O)=O)C2C1)C(O)=O	C30H46O6	503.338	368.388	1.3357839537147	[M+H]+	503.345;467.319;485.335;449.308;504.346	7.57326e+06
3-Nonanone			0.734323	CCCCCCC(=O)CC	C9H18O	143.143	1.84434	1.42639351719091	[M+H]+	69.07;57.07;42.034;55.054;143.033	7.33677e+06
Pyridoxine	alkaloid(生物碱)	pyridines(吡啶类生物碱)	0.698239	OC=1C(=NC=C(C1CO)CO)C	C8H11NO3	170.081	41.7146	1.51311737700988	[M+H]+	170.081;124.076;70.066;142.087;96.081	7.29524e+06
Rubrofusarin			0.834016	CC1=CC(=O)C2=C(O1)C=C3C=C(C=C(C3=C2O)O)OC	C15H12O5	273.076	101.612	1.7252658119752	[M+H]+	273.077;153.018;147.045;119.05;274.075	7.23315e+06
4,6-Dihydroxy-5a-methyl-3-methylene-2-oxododecahydronaphtho[1,2-b]furan-9-carbaldehyde	terpenoids(萜类)	secoiridoid(裂环环烯醚萜类);mycrane_monoterpenoids(月桂烷型单萜类);artemisane(蒿烷型单萜类);cyclogeraniane(环香叶烷型单萜类)	0.73628	CC12CC(O)C3C(OC(=O)C3=C)C1C(CCC2O)C=O	C15H20O5	298.165	266.604	0.714198339514203	[M+NH4]+	263.128;245.116;217.122;237.151;298.165	7.15499e+06
Trigoneoside XIIb	terpenoids(萜类)	cyclogeraniane(环香叶烷型单萜类);secoiridoid(裂环环烯醚萜类);mycrane_monoterpenoids(月桂烷型单萜类);menthane_monoterpenoids(薄荷烷型单萜类);iridoid(环戊烷环烯醚萜类);lavandulane(薰衣草烷型单萜类);artemisane(蒿烷型单萜类)	0.650358	CC(CCC1(O)OC2CC3C4CCC5=CC(CCC5(C)C4CCC3(C)C2C1C)OC1OC(CO)C(O)C(O)C1OC1OC(C)C(O)C(O)C1O)COC1OC(CO)C(O)C(O)C1O	C45H74O18	903.499	223.473	2.1650589696714	[M+H]+	903.511;903.479;255.209;741.454;273.223	7.11396e+06
5-[2-(3-Furyl)ethyl]-8a-(hydroxymethyl)-5,6-dimethyl-3,4,4a,5,6,7,8,8a-octahydro-1-naphthalenecarboxylic acid	terpenoids(萜类)	cyclogeraniane(环香叶烷型单萜类);lavandulane(薰衣草烷型单萜类);artemisane(蒿烷型单萜类);mycrane_monoterpenoids(月桂烷型单萜类);secoiridoid(裂环环烯醚萜类)	0.633639	CC1CCC\2(CO)C(CC\C=C2C(O)=O)C1(C)CCC3=COC=C3	C20H28O4	333.207	234.956	2.21582353561317	[M+H]+	333.205;213.028;334.207;315.193;83.049	7.08151e+06
2-Hydroxybenzaldehyde		Cinnamomi Ramulus(桂枝);Ligusticum Chuanxiong(川芎);Ligusticum Chuanxiong(香果);Paeonia Lactiflora Wild(赤芍);Ephedra Sinica(麻黄根);Ephedra Sinica(麻黄);Solidago Decurrens(一枝黄花);Notopterygium Incisum(羌活);Notopterygium Incisum(草本植物羌活);Sargassum(海藻);Sargassum(马尾藻属)	1	OC1=CC=CC=C1C=O	C7H6O2	121.029	48.3718	4.10389112224637	[M-H]-	121.029;122.025;94.029;120.022;93.035	7.06191e+06
Phthalic anhydride			1	O=c(o1)c(c2)c(ccc2)c(=O)1	C8H4O3	149.023	686.713	1.31861559543353	[M+H]+	149.023;150.104;121.028;122.071;93.07	7.01083e+06
(4S,5Z,6S)-4-(2-methoxy-2-oxoethyl)-5-[2-[(E)-3-phenylprop-2-enoyl]oxyethylidene]-6-[(2S,3R,4S,5S,6R)-3,4,5-trihydroxy-6-(hydroxymethyl)oxan-2-yl]oxy-4H-pyran-3-carboxylic acid	phenylpropanoids(苯丙素类)	coumarins(香豆素类)	0.734731	O=C1OC=2C=C3OC(CC3=CC2C=C1)C(OC(=O)C(=CC)C)(C)C	C19H20O5	329.138	282.757	1.37835561277718	[M+H]+	329.138;311.129;267.139;293.119;169.065	7.00713e+06
N-(14-Methylhexadecanoyl)pyrrolidine			0.991708	CCC(C)CCCCCCCCCCCCC(=O)N1CCCC1	C21H41NO	324.326	848.747	1.33028853052471	[M+H]+	324.324;86.097;325.329;81.045;59.06	7.00147e+06
Lysionotin	flavonoids(黄酮类)	Lysionotus Pauciflorus(石吊兰);Lysionotus Pauciflorus(吊石苣苔);Acanthopanax Trifoliatus(刺三甲);Helianthus Pumilus(矮向日葵);Helianthus Annuus(向日葵叶);Helianthus Annuus(向日葵花);Helianthus Annuus(向日葵籽);Helianthus Annuus(向日葵茎髓);Lysimachia Congestiflora(聚花过路黄);Cedrelopsis Grevei(博落回);Asparagus Cochinchinensis(天门冬);Ocimum Canum(樟脑罗勒);Gardenia Gummifera(胶栀子)	0.7123	COC1=CC=C(C=C1)C2=CC(=O)C3=C(C(=C(C(=C3O2)OC)O)OC)O	C18H16O7	343.083	337.645	1.89929920066729	[M-H]	328.059;343.08;313.036;298.011;285.04	6.99899e+06
Lapachol	quinones(醌类)	α-naphthoquinones(α-萘醌类)	0.751342	CC(C)=CCc(c(O)1)c(=O)c(c2)c(ccc2)c(=O)1	C15H14O3	243.101	323.025	1.5200667553208	[M+H]+	243.138;189.055;201.056;187.04;131.049	6.99646e+06
9-hydroxy-1,4a-dimethyl-7-propan-2-yl-2,3,4,9,10,10a-hexahydrophenanthrene-1-carboxylic acid	terpenoids(萜类)	mycrane_monoterpenoids(月桂烷型单萜类);secoiridoid(裂环环烯醚萜类);cyclogeraniane(环香叶烷型单萜类)	0.920321	O=C(O)C1(C)CCCC2(C3=CC=C(C=C3C(O)CC12)C(C)C)C	C20H28O3	334.237	167.383	2.09984056801269	[M+NH4]+	334.237;234.184;335.244;146.097;246.151	6.89655e+06
Protocatechualdehyde	Phenols(酚类)		1	C1=CC(=C(C=C1C=O)O)O	C7H6O3	139.039	471.771	0.242486675177198	[M+H]	97.029;140.106;111.045;139.04;74.097	6.74206e+06
2''-O-beta-L-galactopyranosylorientin	flavonoids(黄酮类)	Trollius Ledebourii(短瓣金莲花)	0.749229	C1=CC(=C(C=C1C2=CC(=O)C3=C(O2)C(=C(C=C3O)O)C4C(C(C(C(O4)CO)O)O)OC5C(C(C(C(O5)CO)O)O)O)O)O	C27H30O16	609.147	41.6295	0.41833749221355	[M-H]	609.141;369.061;399.073;489.102;96.96	6.66555e+06
Hispidulin	flavonoids(黄酮类)	Plantaginis Semen(车前子);Millingtonia Hortensis(老鸦烟筒花);Digitalis Ferruginea(锈毛地黄);Wikstroemia Indica(了哥王根);Citrus Sudachi(苏打其柑桔);Citrus Sudachi(酢橘);Plantago Depressa Willd.(平车前);Nepeta Hindostana(印度假荆芥);Scutellaria Przewalskii(深裂叶黄芩);Salvia Officinalis(药用丹参叶);Salvia Officinalis(药用鼠尾草);Artemisia Argyi/Radix Astragali(艾叶黄芪);Artemisia Argyi(艾叶);Belamcanda Chinensis(射干);Glycyrrhiza Uralensis(甘草);Glycyr…	0.725174	COC1=C(C2=C(C=C1O)OC(=CC2=O)C3=CC=C(C=C3)O)O	C16H12O6	299.056	285.471	0.522713918726493	[M-H]	284.032;299.058;119.05;199.075;285.035	6.63364e+06
7-Hydroxycoumarin	phenylpropanoids(苯丙素类)	Citrus Tamurana(小唐松草);Citrus Tamurana(柑橘属);Artemisia Argyi(艾叶);Bombyx Mori(蚕);Bombyx Mori(白僵蚕);Bombyx Mori(蚕茧);Bombyx Mori(原蚕子);Bombyx Mori(原蚕蛾);Atropa Belladonna(颠茄);Heracleum(独活属);Hydrangea Chinensis(绣球花对);Apium(芹属);Wikstroemia Indica(了哥王根);Ruta(芸香草);Ruta(芸香草属);Citri Grandis Exocarpium(化橘红);Foeniculum Vulgare(茴香茎叶);Foeniculum Vulgare(小茴香);Foeniculum Vulgare(茴香根);Citrus Aurantium(酸橙);Citrus Aura…	0.888176	C1=CC(=CC2=C1C=CC(=O)O2)O	C9H6O3	161.024	100.97	1.26356010224719	[M-H]	161.025;73.03;59.014;133.03;85.03	6.59703e+06
Dihydrocarvone			0.784241	CC1CCC(CC1=O)C(C)=C	C10H16O	153.128	121.112	4.46634114402831	[M+H]+	153.128;109.101;43.018;135.117;107.085	6.58744e+06
Ononin	flavonoids(黄酮类)	isoflavones(异黄酮类)	0.929141	O=C2C(=COC3=CC(OC1OC(CO)C(O)C(O)C1(O))=CC=C23)C4=CC=C(OC)C=C4	C22H22O9	431.134	207.335	0.241814621911558	[M+H]+	269.079;128.071;430.335;431.332;270.084	6.57686e+06
(+/-)-Jasmonic acid	Fatty acids(脂肪酸类)	Jasminum Officinale(素方花);Jessamine(茉莉花);Camellia Sinensis(茶子);Camellia Sinensis(茶花);Camellia Sinensis(茶树根);Camellia Sinensis(茶叶);Jasminum Grandiflorum L.(素馨花);Citrus Aurantium(酸橙);Citrus Aurantium(枳壳);Citrus Aurantium(苦橙);Citrus Aurantium(玳玳花);Citrus Aurantium(枳实);Citrus Aurantium(仙客来);Vicia Faba(蚕豆);Vicia Faba(蚕豆壳);Vicia Faba(蚕豆叶);Vicia Faba(马蚕豆)	0.683906	CCC=CCC1C(CCC1=O)CC(=O)O	C12H18O3	209.118	312.969	1.11288104804917	[M-H]-	209.118;163.114;191.106;210.12;147.082	6.56174e+06
Matairesinol	phenylpropanoids(苯丙素类)	Podocarpus Spicatus(穗花罗汉松);Heliopsis(赛菊芋属);Tsuga Heterophylla(异叶铁杉);Hippophae Rhamnoides(中亚沙棘);Hippophae Rhamnoides(醋柳果);Hippophae Rhamnoides(江孜沙棘);Hippophae Rhamnoides(云南沙棘);Hippophae Rhamnoides(中国沙棘);Hippophae Rhamnoides(沙棘);Trachelospermum Jasminoides(络石藤);Abies Sp.(冷杉属);Daphne Genkwa(芫花根);Picea Sp.(云杉属);Arctium Lappa(牛蒡子);Arctium Lappa(牛蒡根);Arctium Lappa(牛蒡);Arctium Lappa(牛蒡叶);Forsythia Suspe…	1	COC1=CC(CC2COC(=O)C2CC2=CC=C(O)C(OC)=C2)=CC=C1O	C20H22O6	357.135	347.146	2.269326098279	[M-H]-	357.134;358.141;227.127;313.141;226.124	6.50939e+06
Propranolol	Aromaticity(芳香族化合物)		1	CC(C)NCC(COC1=CC=CC2=CC=CC=C21)O	C16H21NO2	260.162	902.428	1.47381909767006	[M+H]+	260.16;261.129;110.072;112.087;136.087	6.50213e+06
Neobavaisoflavone	flavonoids(黄酮类)	isoflavones(异黄酮类)	0.979839	CC(=CCC1=C(C=CC(=C1)C2=COC3=C(C2=O)C=CC(=C3)O)O)C	C20H18O4	323.128	394.528	0.398998463197501	[M+H]	323.128;267.066;255.067;69.07;239.07	6.47752e+06
5-[6-(3-hydroxy-4-methoxyphenyl)-1,3,3a,4,6,6a-hexahydrofuro[3,4-c]furan-3-yl]-2-methoxyphenol	phenylpropanoids(苯丙素类)	Smilax Scobinicaulis C.H.Wright(铁丝灵仙);Clematis Chinensis(威灵仙);Claviceps Purpurea(麦角菌);Claviceps Purpurea(麦角)	0.793801	OC1=CC(=CC=C1OC)C2OCC3C(OCC23)C4=CC=C(OC)C(O)=C4	C20H22O6	357.134	333.1	0.0455650645524799	[M-H]-	357.134;342.115;325.111;327.09;358.141	6.45712e+06
p-Cymene			1	CC(C)C1=CC=C(C)C=C1	C10H14	135.117	743.29	0.823917121510819	[M+H]+	135.117;136.087;107.085;93.07;95.06	6.41399e+06
isoimperatorin	phenylpropanoids(苯丙素类)	Saposhnikovia Divaricata(防风);Notopterygium Incisum(羌活);Notopterygium Incisum(草本植物羌活);Citri Exocarpium Rubrum(橘红);Notopterygium Forbesii(宽叶羌活);Angelica Biserrata(独活);Glehnia Littoralis(北沙参);Catharanthus Roseus(长春花);Angelica Furcijuga(分叉当归);Rhododendron Dauricum(满山红);Rubus Idaeus(覆盆子);Rubus Idaeus(丹参);Angelica Dahurica(白芷);Angelica Dahurica(杭白芷);Angelica Dahurica(祁白芷);Angelica Decursiva(前胡);Angelic…	0.865923	O=C1OC=2C=C3OC=CC3=C(OCC=C(C)C)C2C=C1	C16H14O4	269.081	136.336	2.05809374750921	[M-H]-	109.029;269.08;159.044;254.058;147.046	6.40073e+06
Matricin	terpenoids(萜类)	lavandulane(薰衣草烷型单萜类)	0.758651	CC1C2C(OC1=O)C1C(C=CC1(C)O)=C(C)CC2OC(C)=O	C17H22O5	307.154	295.498	0.642037904085188	[M+H]+	307.154;119.05;201.127;289.181;173.133	6.39686e+06
Oleanane -2H, +1O, 1COOH, O-HexA-HexA	terpenoids(萜类)	Glycyrrhiza Uralensis(甘草);Glycyrrhiza Uralensis(植物甘草);Glycyrrhiza Uralensis(乌拉尔甘草)	0.747623	O=C(O)C7OC(OC1C(OC(C(=O)O)C(O)C1(O))OC6CCC5(C)(C(CCC3(C)(C5(CC=C2C4CC(C(=O)O)(C)CCC4(C)(CCC23(C)))))C6(C)(C)))C(O)C(O)C7(O)	C42H64O15	807.418	482.375	0.950936115781453	[M-H]-	807.401;351.056;113.025;808.422;193.034	6.30966e+06
Dihydrovaltrate			0.941848	CC(C)CC(=O)OCC1=COC(OC(=O)CC(C)C)C2C1CC(OC(C)=O)C21CO1	C22H32O8	425.215	751.851	0.178958539565512	[M+H]+	425.215;380.391;365.192;426.217;281.134	6.20963e+06
LYSINE	Amino acid derivatives(氨基酸衍生物)		0.697092	O=C(O)C(N)CCCCN	C6H14N2O2	147.117	402.884	1.00586806315038	[M+H]+	147.117;105.07;119.086;91.054;148.037	6.12542e+06
Honokiol	phenylpropanoids(苯丙素类)	Magnolia Biloba(凹叶厚朴);Magnolia Hypoleuca(日本厚朴);Agave Sisalana(琼麻);Illicium Verum(八角茴香);Illicium Verum(八角);Magnolia Officinalis(厚朴花);Magnolia Officinalis(厚朴)	0.979414	C=CCC1=CC(=C(C=C1)O)C2=CC(=C(C=C2)O)CC=C	C18H18O2	265.123	525.227	0.269670076666109	[M-H]	265.123;96.96;247.114;266.126;245.097	6.06456e+06
4-Butyl-gamma-butyrolactone			0.934004	CCCCC1CCC(=O)O1	C8H14O2	143.107	353.855	1.15099714616579	[M+H]+	143.033;71.049;125.024;43.018;98.06	5.97035e+06
Scutellarein	flavonoids(黄酮类)	Oroxylum Indicum(木蝴蝶树皮);Perilla Frutescens(白苏);Perilla Frutescens(紫苏子);Perilla Frutescens(青紫苏);Perilla Frutescens(紫苏);Perilla Frutescens(白苏子);Perilla Frutescens(苏子);Scutellaria Amoena(滇黄芩);Scutellaria Indica(韩信草);Portulaca Grandiflora(半枝莲);Portulaca Grandiflora(大花马齿苋);Pinus Tabulaeformis(松节);Pinus Tabulaeformis(姐妹树);Carthamus Tinctorius(红花);Plantago Asiatica(车前);Plantago Asiatica(植物车前);Plantago A…	1	C1=CC(=CC=C1C2=CC(=O)C3=C(O2)C=C(C(=C3O)O)O)O	C15H10O6	285.04	253.532	0.247999405219322	[M-H]	285.041;286.043;109.029;59.013;241.144	5.95904e+06
4-Ethyl-2-methoxyphenol			0.7754	CCC1=CC(OC)=C(O)C=C1	C9H12O2	153.091	68.793	1.51687248599044	[M+H]+	95.049;140.035;43.018;153.055;125.059	5.88204e+06
Lucyin A	terpenoids(萜类)	secoiridoid(裂环环烯醚萜类);mycrane_monoterpenoids(月桂烷型单萜类);menthane_monoterpenoids(薄荷烷型单萜类);lavandulane(薰衣草烷型单萜类);artemisane(蒿烷型单萜类);cyclogeraniane(环香叶烷型单萜类)	0.68224	CC1(C)CC2C3=CCC4C5(C)CCC(O)C(C)(C=O)C5CCC4(C)C3(C)CCC2(CC1O)C(O)=O	C30H46O5	487.341	353.509	2.35514973901934	[M+H]+	487.349;235.168;95.086;189.164;54.15	5.84321e+06
9-Hydroxycalabaxanthone			1	COC1=C(O)C=C2OC3=C(C(O)=C4C=CC(C)(C)OC4=C3)C(=O)C2=C1CC=C(C)C	C24H24O6	409.161	399.221	1.53660347508368	[M+H]+	409.165;410.17;70.846;81.069;95.086	5.78967e+06
Epoxyganoderiol A	terpenoids(萜类)	iridoid(环戊烷环烯醚萜类);lavandulane(薰衣草烷型单萜类);artemisane(蒿烷型单萜类);mycrane_monoterpenoids(月桂烷型单萜类);secoiridoid(裂环环烯醚萜类);cyclogeraniane(环香叶烷型单萜类)	0.758916	CC(CCC1OC1(C)CO)C1CCC2(C)C3=C(CCC12C)C1(C)CCC(=O)C(C)(C)C1CC3O	C30H48O4	473.362	447.878	1.53626449293778	[M+H]+	123.117;143.107;473.359;437.343;141.128	5.75473e+06
Lucidone C	terpenoids(萜类)	mycrane_monoterpenoids(月桂烷型单萜类);lavandulane(薰衣草烷型单萜类);secoiridoid(裂环环烯醚萜类);cyclogeraniane(环香叶烷型单萜类)	1	CC(=O)C1CC(O)C2(C)C3=C(C(=O)CC12C)C1(C)CCC(O)C(C)(C)C1CC3O	C24H36O5	405.261	594.919	0.963645903891191	[M+H]+	405.259;406.269;293.135;171.062;64.843	5.67999e+06
Wikstromol	phenylpropanoids(苯丙素类)	Trachelospermum Asiaticum(日本络石);Ipomoea Cairica(五爪金龙 (植物));Trachelospermum Jasminoides(络石藤);Carissa Edulis(云南假虎刺);Pinus Palustris(长叶松);Cnicus Benedictus(地中海菊);Wikstroemia Indica(了哥王根)	0.929696	O=C1OCC(CC2=CC=C(O)C(OC)=C2)C1(O)CC3=CC=C(O)C(OC)=C3	C20H22O7	373.129	290.583	0.425567665853351	[M-H]-	373.13;358.11;374.136;314.116;329.082	5.6723e+06
4-[5-(4-hydroxy-3-methoxyphenyl)-3,4-dimethyloxolan-2-yl]-2-methoxyphenol	phenylpropanoids(苯丙素类)	Piper Mullesua(短蒟);Myristica Fragrans(肉豆蔻)	1	OC1=CC=C(C=C1OC)C2OC(C3=CC=C(O)C(OC)=C3)C(C)C2C	C20H24O5	343.155	356.277	2.79017809068412	[M-H]-	343.158;344.159;313.036;311.129;328.06	5.65646e+06
L-2-Amino-3-(4-aminophenyl)propanoic acid			0.850378	NC(CC1=CC=C(N)C=C1)C(O)=O	C9H12N2O2	181.098	36.1145	3.08154418518409	[M+H]+	181.097;163.087;135.092;182.081;121.076	5.54572e+06
Ganoderic acid DM	terpenoids(萜类)	cyclogeraniane(环香叶烷型单萜类);iridoid(环戊烷环烯醚萜类);lavandulane(薰衣草烷型单萜类);artemisane(蒿烷型单萜类);mycrane_monoterpenoids(月桂烷型单萜类);secoiridoid(裂环环烯醚萜类)	0.744333	CC(CC\C=C(/C)C(O)=O)C1CCC2(C)C3=C(CCC12C)C1(C)CCC(=O)C(C)(C)C1CC3=O	C30H44O4	469.332	468.14	0.776046316134438	[M+H]+	469.328;451.321;52.149;95.086;107.086	5.53945e+06
Floribundine	alkaloid(生物碱)	tetrahydroisoquinolines(四氢异喹啉类生物碱);isoquinolines_2(异喹啉类生物碱)	1	COC1=C(O)C=C2CCN(C)C3CC4=CC=CC=C4C1=C23	C18H19NO2	282.146	867.357	0.38989062784879	[M+H]+	282.144;69.069;241.122;83.086;57.07	5.51914e+06
Withaphysacarpin	terpenoids(萜类)	secoiridoid(裂环环烯醚萜类);iridoid(环戊烷环烯醚萜类);lavandulane(薰衣草烷型单萜类);artemisane(蒿烷型单萜类);mycrane_monoterpenoids(月桂烷型单萜类);menthane_monoterpenoids(薄荷烷型单萜类);cyclogeraniane(环香叶烷型单萜类)	0.933233	CC1CC(OC(=O)C1C)C(C)(O)C1C(O)CC2C3CC4OC44C(O)C=CC(=O)C4(C)C3CCC12C	C28H40O7	489.281	281.421	0.52377445013567	[M+H]+	489.28;56.05;211.133;193.124;54.366	5.41225e+06
5-O-Demethylnobiletin	flavonoids(黄酮类)	flavones(黄酮类)	0.965248	COC1=C(C=C(C=C1)C2=CC(=O)C3=C(C(=C(C(=C3O2)OC)OC)OC)O)OC	C20H20O8	389.123	273.76	3.09255741243056	[M+H]	389.125;359.077;374.099;341.067;331.082	5.3942e+06
Ginsenoside F3	terpenoids(萜类)	Panax Japonicus(竹节参);Panax Japonicus(竹节人参);Codonopsis Convolvulacea(珠子参);Codonopsis Convolvulacea(鸡蛋参)	0.776604	CC(C)=CCCC(C)(OC1OC(COC2OCC(O)C(O)C2O)C(O)C(O)C1O)C1CCC2(C)C1C(O)CC1C3(C)CCC(O)C(C)(C)C3C(O)CC21C	C41H70O13	815.481	253.021	1.61608273183267	[M+HCOO]-	815.477;815.505;637.433;769.478;769.503	5.29668e+06
Corosolic acid	terpenoids(萜类)	lavandulane(薰衣草烷型单萜类);artemisane(蒿烷型单萜类);mycrane_monoterpenoids(月桂烷型单萜类);menthane_monoterpenoids(薄荷烷型单萜类);secoiridoid(裂环环烯醚萜类);cyclogeraniane(环香叶烷型单萜类)	0.688393	CC1CCC2(CCC3(C)C(=CCC4C5(C)CC(O)C(O)C(C)(C)C5CCC34C)C2C1C)C(O)=O	C30H48O4	473.363	353.855	0.754804815099466	[M+H]+	473.358;123.117;143.107;437.343;125.096	5.29027e+06
2,3-bis[(4-hydroxy-3-methoxyphenyl)methyl]butane-1,4-diol	phenylpropanoids(苯丙素类)	Glehnia Littoralis(北沙参);Tsuga Heterophylla(异叶铁杉);Hippophae Rhamnoides(中亚沙棘);Hippophae Rhamnoides(醋柳果);Hippophae Rhamnoides(江孜沙棘);Hippophae Rhamnoides(云南沙棘);Hippophae Rhamnoides(中国沙棘);Hippophae Rhamnoides(沙棘);Davallia Mariesii(骨碎补);Davallia Mariesii(海州骨碎补);Saussurea Medusa(水母雪莲);Saussurea Medusa(水母雪兔子);Zanthoxylum Ailanthoides(樗叶花椒根);Zanthoxylum Ailanthoides(樗叶花椒皮);Zanthoxylum Ailanthoides(樗叶花椒);Z…	0.977463	COC1=CC(CC(CO)C(CO)CC2=CC=C(O)C(OC)=C2)=CC=C1O	C20H26O6	361.166	261.689	0.0857570241214208	[M-H]-	361.163;328.131;201.113;362.17;171.102	5.23698e+06
Phenylacetaldehyde	Phenols(酚类)		0.999828	O=CCC=1C=CC=CC1	C8H8O	121.065	398.738	2.32858689501969	[M+H]+	121.065;93.07;122.071;91.054;105.07	5.19706e+06
Flavanone + 3O, O-Hex	flavonoids(黄酮类)	Prunus Verecunda(味瑞李);Glycyrrhiza Glabra(光果甘草);Glycyrrhiza Glabra(欧亚甘草);Prunus Persica(桃);Prunus Persica(桃茎白皮);Prunus Persica(桃叶);Prunus Persica(桃根);Prunus Persica(桃枝);Prunus Persica(桃花);Podocarpus(罗汉松属);Miscanthus Sinensis(芒根);Miscanthus Sinensis(中国芒);Prunus Pudding(普敦李);Lycopersicon Esculentum(番茄);Dalbergia Miscolobium(米斯科黄檀);Abies(冷杉属);Pterocarpus Angolensis(安哥拉紫檀);Phyllanthus Emblica(油柑叶);Phy…	0.81205	O=C3C4=C(O)C=C(OC1OC(CO)C(O)C(O)C1(O))C=C4(OC(C2=CC=C(O)C=C2)C3)	C21H22O10	433.113	172.689	1.06688297506229	[M-H]-	271.062;151.004;119.051;433.116;373.131	5.05267e+06
2-Cyclohexen-1-one, 4-hydroxy-4-(3-hydroxybutyl)-3,5,5-trimethyl-			0.956786	CC(O)CCC1(O)\C(=C/C(=O)CC1(C)C)C	C13H22O3	227.164	135.986	1.99970332723886	[M+H]+	109.101;151.111;209.154;228.138;127.112	5.05118e+06
Benzyl alcohol + Hex-Hex		Asystasia Intrusa(插入十万错);Ziziphus Jujuba(大枣);Ziziphus Jujuba Var. Inermis(无刺枣)	0.831323	OCC3OC(OCC1=CC=CC=C1)C(OC2OC(CO)C(O)C(O)C2(O))C(O)C3(O)	C19H28O11	431.157	46.0834	1.28020064283075	[M-H]-	59.014;431.164;57.035;125.024;71.014	4.95863e+06
Deltonin	terpenoids(萜类)	secoiridoid(裂环环烯醚萜类);mycrane_monoterpenoids(月桂烷型单萜类);menthane_monoterpenoids(薄荷烷型单萜类);iridoid(环戊烷环烯醚萜类);lavandulane(薰衣草烷型单萜类);artemisane(蒿烷型单萜类);cyclogeraniane(环香叶烷型单萜类)	0.65489	CC1C2C(CC3C4CC=C5CC(CCC5(C)C4CCC23C)OC2OC(CO)C(OC3OC(CO)C(O)C(O)C3O)C(O)C2OC2OC(C)C(O)C(O)C2O)OC11CCC(C)CO1	C45H72O17	885.489	235.994	2.33434722575095	[M+H]+	885.493;723.437;253.194;885.524;129.055	4.95436e+06
Ganoderiol F	terpenoids(萜类)	secoiridoid(裂环环烯醚萜类);iridoid(环戊烷环烯醚萜类);lavandulane(薰衣草烷型单萜类);artemisane(蒿烷型单萜类);mycrane_monoterpenoids(月桂烷型单萜类);cyclogeraniane(环香叶烷型单萜类)	0.875442	CC(CCC=C(CO)CO)C1CCC2(C)C3=CCC4C(C)(C)C(=O)CCC4(C)C3=CCC12C	C30H46O3	455.353	330.622	2.64295173910697	[M+H]+	455.353;437.344;123.117;109.101;143.107	4.86339e+06
Piperonylic Acid	Organic acids and derivatives(有机酸及其衍生物)	Piper Longum(荜拔)	0.851039	O=C(O)C1=CC=C2OCOC2=C1	C8H6O4	165.019	58.0594	2.01564836506054	[M-H]-	121.029;165.057;59.014;75.009;93.035	4.8555e+06
Kessyl glycol	terpenoids(萜类)	mycrane_monoterpenoids(月桂烷型单萜类);iridoid(环戊烷环烯醚萜类);lavandulane(薰衣草烷型单萜类);secoiridoid(裂环环烯醚萜类)	0.878355	CC1CC(O)C2C1CC1C(O)CC2(C)OC1(C)C	C15H26O3	255.195	298.212	1.80254928912831	[M+H]+	237.186;255.197;95.086;219.176;109.101	4.83028e+06
3,4-Dimethylbenzoic acid		Actinidia Polygama(木天蓼);Panax Pseudo-Ginseng(假人参)	0.825546	CC1=C(C)C=C(C=C1)C(O)=O	C9H10O2	149.061	81.3871	1.7574920832915	[M-H]-	149.062;121.029;59.014;103.932;134.038	4.76969e+06
alpha-Linolenic acid	Aliphatic acyl(脂肪酰类)		0.862749	CCC=CCC=CCC=CCCCCCCCC(=O)O	C18H30O2	279.232	431.222	1.41360561819368	[M+H]	81.07;95.086;67.055;279.234;109.101	4.74576e+06
Atractylenolide III	terpenoids(萜类)	Atractylodes Macrocephala(白术);Atractylodes Lancea(苍术);Stephania Cepharantha(金线吊乌龟);Papaver Somniferum(罂粟);Papaver Somniferum(鸦片);Codonopsis Pilosula(党参);Codonopsis Pilosula(素花党参);Codonopsis Subglobosa(球花党参);Poria Cocos(茯苓);Papaveris Pericarpium(罂粟壳)	0.947823	CC1=C2CC3C(=C)CCCC3(C)CC2(O)OC1=O	C15H20O3	247.133	389.04	2.62590083546517	[M-H]-	247.133;203.145;135.082;95.05;185.134	4.74197e+06
4-Ethylbenzaldehyde			0.999849	CCC1=CC=C(C=O)C=C1	C9H10O	135.081	462.776	3.84736306995815	[M+H]+	107.085;135.081;136.063;91.054;105.07	4.68124e+06
Gibberellin A44	terpenoids(萜类)	Amygdalus Persica(植物桃)	1	CC12CCCC3(COC1=O)C1CCC4(O)CC1(CC4=C)C(C23)C(O)=O	C20H26O5	345.17	392.08	0.382709310093314	[M-H]-	345.174;346.177;315.161;327.163;301.181	4.37631e+06
Soyasapogenol B base + O-HexA-Pen-dHex	terpenoids(萜类)	Astragalus Membranaceus(黄芪);Astragalus Membranaceus(膜荚黄耆)	0.953039	O=C(O)C8OC(OC5CCC4(C)(C(CCC2(C)(C4(CC=C1C3CC(C)(C)CC(O)C3(C)(CCC12(C)))))C5(C)(CO)))C(OC7OCC(O)C(O)C7(OC6OC(C)C(O)C(O)C6(O)))C(O)C8(O)	C47H76O17	911.499	394.36	1.9008758065479	[M-H]-	911.503;911.47;912.529;113.025;101.28	4.34984e+06
Curcumenol	terpenoids(萜类)	Curcuma Zedoaria(平莪术);Curcuma Zedoaria(莪术)	1	OC12OC3(CC1=C(C)C)C(C(=C2)C)CCC3C	C15H22O2	233.154	545.471	0.312391090197604	[M-H]-	233.155;234.158;63.176;65.762;73.351	4.34428e+06
D-GLUCURONIC ACID		Zea Mays(玉蜀黍);Zea Mays(玉米);Zea Mays(玉米麸);Citrus Wilsonii(香橼);Laminaria Japonica(海带);Astragalus Membranaceus(黄芪);Astragalus Membranaceus(膜荚黄耆);Colocasia Antiquorum(野芋);Momordica Charantia(苦瓜);Sojae Semen Nigrum(黑豆);Panax Ginseng(人参芦);Panax Ginseng(人参叶);Panax Ginseng(人参花蕾);Panax Ginseng(人参);Allium Fistulosum(葱白);Polygonatum Sibiricum(黄精);Glycyrrhiza Uralensis(甘草);Glycyrrhiza Uralensis(植物甘草);Glycyrr…	0.695067	C1(C(C(OC(C1O)O)C(=O)O)O)O	C6H10O7	193.035	35.62	1.19010506700094	[M-H]-	111.009;113.013;59.013;85.03;72.994	4.20549e+06
9-Hydroxy-10,12,15-octadecatrienoic acid		Lycii Cortex(地骨皮)	0.791146	O=C(O)CCCCCCCC(O)C=CC=CCC=CCC	C18H30O3	293.213	518.14	2.11766938633783	[M-H]-	293.215;275.202;235.172;59.014;221.153	4.18548e+06
1-[4-hydroxy-3-(3-methylbut-2-enyl)phenyl]ethanone		Curry Plant(义大利蜡菊);Helichrysum Italicum(意大利蜡菊)	0.648165	O=C(C1=CC=C(O)C(=C1)CC=C(C)C)C	C13H16O2	203.107	320.047	2.56575388499027	[M-H]-	203.107;159.119;157.102;119.051;52.483	4.13499e+06
Actinidic acid	terpenoids(萜类)	secoiridoid(裂环环烯醚萜类);lavandulane(薰衣草烷型单萜类);artemisane(蒿烷型单萜类);mycrane_monoterpenoids(月桂烷型单萜类);menthane_monoterpenoids(薄荷烷型单萜类);cyclogeraniane(环香叶烷型单萜类)	0.972731	CC1C2C3=CCC4C5(C)CC(O)C(O)C(C)(CO)C5CCC4(C)C3(C)CCC2(CCC1=C)C(O)=O	C30H46O5	487.341	416.043	1.63669310969481	[M+H]+	487.349;439.322;189.163;119.085;217.16	4.11556e+06
7-methoxy-6-(1,2,3-trihydroxy-3-methylbutyl)chromen-2-one	phenylpropanoids(苯丙素类)	coumarins(香豆素类)	0.662172	O=C1OC=2C=C(OC)C(=CC2C=C1)C(O)C(O)C(O)(C)C	C15H18O6	295.118	462.776	1.15779486655493	[M+H]+	133.064;97.028;107.086;295.226;277.214	4.02627e+06
3,3',4,4'-tetrahydroxylignan	phenylpropanoids(苯丙素类)	lignans(木脂素类)	0.818082	CC(Cc1ccc(O)c(O)c1)C(C)Cc1ccc(O)c(O)c1	C18H22O4	303.159	436.887	0.564524086623134	[M+H]+	303.084;177.055;153.018;285.183;304.286	3.94671e+06
Magnolol	phenylpropanoids(苯丙素类)	lignans(木脂素类)	0.934938	OC1=CC=C(CC=C)C=C1C1=CC(CC=C)=CC=C1O	C18H18O2	267.138	436.587	1.14941221803796	[M+H]+	267.14;225.091;211.075;231.139;268.138	3.93187e+06
2-Butyl-5-[2-(4-hydroxy-3-methoxyphenyl)ethyl]furan			0.948834	CCCCC1=CC=C(CCC2=CC(OC)=C(O)C=C2)O1	C17H22O3	275.163	261.639	1.8197202552326	[M+H]+	275.164;189.127;147.117;105.07;133.101	3.88211e+06
5,9-dihydroxy-5,7,7-trimethyl-4,5a,6,8,8a,9-hexahydro-1H-azuleno[5,6-c]furan-3-one	terpenoids(萜类)		0.892325	O=C1OCC2=C1CC(O)(C)C3CC(C)(C)CC3C2O	C15H22O4	265.144	429.7	0.628269254974384	[M-H]-	221.153;265.143;222.16;152.083;109.103	3.81021e+06
Valerophenone			0.606944	CCCCC(=O)C1=CC=CC=C1	C11H14O	163.112	231.167	1.60093339570549	[M+H]+	163.112;145.101;107.085;93.07;43.018	3.80999e+06
Curdione	terpenoids(萜类)	mycrane_monoterpenoids(月桂烷型单萜类);lavandulane(薰衣草烷型单萜类)	0.934809	CC1CCC=C(CC(=O)C(CC1=O)C(C)C)C	C15H24O2	237.185	292.1	1.16954755325804	[M+H]	219.176;237.186;95.086;107.085;159.117	3.80445e+06
tectorigenin	flavonoids(黄酮类)	Iris Germanica(德国鸢尾);Belamcanda Chinensis(射干);Ononis Spinosa(刺芒柄花);Ononis Spinosa(红芒柄花);Iris Dichotoma(白花射干);Iris Dichotoma(野鸢尾);Iris Tectorum(鸢尾);Dalbergia(黄檀属);Dalbergia Riparia(河岸黄檀)	0.995604	O=C1C(=COC2=CC(O)=C(OC)C(O)=C12)C=3C=CC(O)=CC3	C16H12O6	299.056	201.889	1.0027704332574	[M-H]-	299.058;284.032;256.038;59.014;271.024	3.73907e+06
8-(2-hydroxy-1-methoxy-3-methylbut-3-enyl)-7-methoxychromen-2-one	phenylpropanoids(苯丙素类)	coumarins(香豆素类)	0.709147	O=C1OC2=C(C=C1)C=CC(OC)=C2C(OC)C(O)C(=C)C	C16H18O5	291.123	233.311	1.51845101466422	[M+H]+	219.067;161.06;291.158;207.064;273.115	3.73575e+06
Timosaponin B II	terpenoids(萜类);steroidal saponin(甾体皂苷类)	Allium Macrostemon(薤白)	0.92312	CC1C2C(CC3C2(CCC4C3CCC5C4(CCC(C5)OC6C(C(C(C(O6)CO)O)O)OC7C(C(C(C(O7)CO)O)O)O)C)C)OC1(CCC(C)COC8C(C(C(C(O8)CO)O)O)O)O	C45H76O19	919.482	242.345	1.12290733206195	[M-H]	919.484;919.518;918.481;268.039;283.058	3.72447e+06
Linalyl anthranilate			0.923393	CC(C)=CCCC(C)(OC(=O)C1=CC=CC=C1N)C=C	C17H23NO2	274.177	839.912	1.63632836038489	[M+H]+	274.18;112.087;110.072;70.065;150.104	3.67962e+06
2,3',4,6-Tetrahydroxybenzophenone	Xanthones(山酮类)	Garcinia Mangostana(山竹子);Garcinia Mangostana(倒捻子);Garcinia Mangostana(莽吉柿)	0.882766	O=C(C=1C=CC=C(O)C1)C=2C(O)=CC(O)=CC2O	C13H10O5	245.045	298.795	0.61544255625419	[M-H]-	245.047;117.035;201.055;173.062;246.05	3.65716e+06
Neobavaisoflavone	flavonoids(黄酮类)	Psoralea Corylifolia(补骨脂);Erythrina Latissima(极宽刺桐)	0.915349	CC(=CCC1=C(C=CC(=C1)C2=COC3=C(C2=O)C=CC(=C3)O)O)C	C20H18O4	321.113	394.943	0.0262323207322786	[M-H]	321.116;265.05;322.12;277.049;266.057	3.65302e+06
Sternbin	flavonoids(黄酮类)	flavanones(二氢黄酮类);dihydrochalcones(二氢查尔酮类)	0.827134	O=C1C2=C(O)C=C(OC)C=C2OC(C3=CC=C(O)C(O)=C3)C1	C16H14O6	303.087	79.8611	0.787859185200563	[M+H]+	303.053;153.018;177.055;304.19;171.03	3.64164e+06
Sugiol	terpenoids(萜类)	mycrane_monoterpenoids(月桂烷型单萜类);secoiridoid(裂环环烯醚萜类);cyclogeraniane(环香叶烷型单萜类)	0.772545	CC(C)C1=CC2=C(C=C1O)C1(C)CCCC(C)(C)C1CC2=O	C20H28O2	301.216	549.63	0.719214208962711	[M+H]+	301.218;259.171;286.048;302.22;163.075	3.62767e+06
Licochalcone B	flavonoids(黄酮类)	Glycyrrhiza Inflata(胀果甘草);Glycyrrhiza Kansuensis(黄甘草)	0.870119	COC1=C(C=CC(=C1O)O)C=CC(=O)C2=CC=C(C=C2)O	C16H14O5	285.077	367.221	0.318809949635867	[M-H]	285.075;164.011;151.004;243.065;286.078	3.54013e+06
Gelsemine	alkaloid(生物碱);terpenoids(萜类)	piperidines(哌啶类生物碱);cyclogeraniane(环香叶烷型单萜类);secoiridoid(裂环环烯醚萜类);iridoid(环戊烷环烯醚萜类);lavandulane(薰衣草烷型单萜类);artemisane(蒿烷型单萜类);mycrane_monoterpenoids(月桂烷型单萜类);menthane_monoterpenoids(薄荷烷型单萜类)	1	CN1CC2(C3CC4C5(C2C1C3CO4)C6=CC=CC=C6NC5=O)C=C	C20H22N2O2	323.172	873.588	2.82108818481751	[M+H]	323.169;324.331;50.087;110.072;173.082	3.47072e+06
Kaurane-17,18-dioic acid	terpenoids(萜类)	cyclogeraniane(环香叶烷型单萜类);secoiridoid(裂环环烯醚萜类);mycrane_monoterpenoids(月桂烷型单萜类);menthane_monoterpenoids(薄荷烷型单萜类);lavandulane(薰衣草烷型单萜类);artemisane(蒿烷型单萜类)	0.753591	CC12CCCC(C)(C1CCC34CC(CCC23)C(C4)C(O)=O)C(O)=O	C20H30O4	335.22	471.771	0.825298206063389	[M+H]+	335.222;233.155;317.213;336.123;191.107	3.44164e+06
Ginsenoside Rb3	terpenoids(萜类)	Panax Ginseng(人参芦);Panax Ginseng(人参叶);Panax Ginseng(人参花蕾);Panax Ginseng(人参);Gynostemma Pentaphyllum(绞股蓝);Panax Quinquefolium(西洋参);Panax Quinquefolium(西洋参茎叶);Panax Japonicus(竹节参);Panax Japonicus(竹节人参)	0.651734	CCC(C)=CCCC(C)(OC1OC(COC2OCC(O)C(O)C2O)C(O)C(O)C1O)C1CCC2(C)C1C(O)CC1C2CCC2C(C)(C)C(CCC12C)OC1OC(CO)C(O)C(O)C1OC1OC(CO)C(O)C(O)C1O	C53H90O22	1123.59	335.329	0.662422220609289	[M+HCOO]-	1077.564;1077.479;1078.58;131.035;119.735	3.42768e+06
p-Mentha-2,4-diene			0.968031	CC(C)C1=CCC(C)C=C1	C10H16	137.132	686.713	2.87290416659739	[M+H]+	81.07;95.086;137.132;138.104;43.018	3.27881e+06
Carpachromene	flavonoids(黄酮类)	Fabaceae(豆科)	0.998044	O=C1C=C(OC=2C=C3OC(C=CC3=C(O)C12)(C)C)C=4C=CC(O)=CC4	C20H16O5	335.092	511.785	0.440104777516758	[M-H]-	335.091;336.095;305.046;319.059;320.068	3.27567e+06
beta-Elemonic acid	terpenoids(萜类)	cyclogeraniane(环香叶烷型单萜类);secoiridoid(裂环环烯醚萜类);iridoid(环戊烷环烯醚萜类);lavandulane(薰衣草烷型单萜类);artemisane(蒿烷型单萜类);mycrane_monoterpenoids(月桂烷型单萜类)	0.99374	CC(=CCCC(C1CCC2(C1(CCC3=C2CCC4C3(CCC(=O)C4(C)C)C)C)C)C(=O)O)C	C30H46O3	455.353	246.057	0.12499243465904	[M+H]	455.354;149.132;50.596;107.085;135.117	3.25082e+06
Pinocembrin	flavonoids(黄酮类)	Piper Nigrum(胡椒);Prunus(李属);Helichrysum(蜡菊属);Dalbergia Odorifera(降香);Dalbergia Odorifera(花梨木);Broussonetia Papyrifera(构树根);Broussonetia Papyrifera(构树果);Broussonetia Papyrifera(构树白皮);Broussonetia Papyrifera(构树);Carya Cathayensis(山核桃);Alpinia Officinarum(高良姜 (山姜属));Goniothalamus Griffithii(大花哥纳香);Glycyrrhiza(甘草属);Alpinia Katsumadai Hayat(豆蔻);Glycyrrhiza Uralensis(甘草);Glycyrrhiza Uralensis(植物甘草);Gly…	0.987503	O=C2C3=C(O)C=C(O)C=C3(OC(C1=CC=CC=C1)C2)	C15H12O4	255.066	370.776	1.00074446045861	[M-H]-	255.067;213.054;151.004;256.068;107.014	3.22977e+06
Ganoderol A	terpenoids(萜类)	secoiridoid(裂环环烯醚萜类);mycrane_monoterpenoids(月桂烷型单萜类);iridoid(环戊烷环烯醚萜类);lavandulane(薰衣草烷型单萜类);artemisane(蒿烷型单萜类);cyclogeraniane(环香叶烷型单萜类)	0.996334	CC(CC\C=C(/C)CO)C1CCC2(C)C3=CCC4C(C)(C)C(=O)CCC4(C)C3=CCC12C	C30H46O2	439.358	368.912	1.77945739744512	[M+H]+	439.36;149.133;440.356;107.085;95.086	3.16476e+06
Quinidine	alkaloid(生物碱)	piperidines(哌啶类生物碱);pyridines(吡啶类生物碱);quinolines(喹啉类生物碱)	1	COC1=CC=C2N=CC=C(C(O)C3CC4CCN3CC4C=C)C2=C1	C20H24N2O2	325.188	902.144	3.04659167224768	[M+H]+	325.191;127.099;110.072;151.098;59.061	3.14926e+06
Isobavachalcone	flavonoids(黄酮类)	Psoralea Corylifolia(补骨脂);Glycyrrhiza Uralensis(甘草);Glycyrrhiza Uralensis(植物甘草);Glycyrrhiza Uralensis(乌拉尔甘草);Broussonetia Papyrifera(构树根);Broussonetia Papyrifera(构树果);Broussonetia Papyrifera(构树白皮);Broussonetia Papyrifera(构树)	0.911581	CC(=CCC1=C(C=CC(=C1O)C(=O)C=CC2=CC=C(C=C2)O)O)C	C20H20O4	323.129	477.537	0.597341153837215	[M-H]	323.129;135.044;201.093;109.029;175.078	3.13631e+06
Methuyl tanshinonate			0.849259	COC(=O)C1(C)CCCC2=C1C=CC1=C2C(=O)C(=O)C2=C1OC=C2C	C20H18O5	339.123	431.822	0.20689420204927	[M+H]+	339.125;123.044;311.129;189.09;340.132	3.13622e+06
Deacetylnomilin	terpenoids(萜类)	cyclogeraniane(环香叶烷型单萜类);secoiridoid(裂环环烯醚萜类);lavandulane(薰衣草烷型单萜类);artemisane(蒿烷型单萜类);mycrane_monoterpenoids(月桂烷型单萜类);menthane_monoterpenoids(薄荷烷型单萜类)	0.7307	CC12CCC3C4(C)C(CC(=O)C3(C)C11OC1C(=O)OC2C1=COC=C1)C(C)(C)OC(=O)CC4O	C26H32O8	473.216	438.361	2.58816536492227	[M+H]+	473.21;52.58;474.214;413.19;107.085	3.08712e+06
3,12-dihydroxy-4,6a,6b,11,12,14b-hexamethyl-1,2,3,4a,5,6,7,8,9,10,11,12a,14,14a-tetradecahydropicene-4,8a-dicarboxylic acid	terpenoids(萜类)	Ilex Pubescens(秃毛冬青);Ilex Pubescens(毛冬青)	0.893783	O=C(O)C12CCC(C)C(O)(C)C2C3=CCC4C5(C)CCC(O)C(C(=O)O)(C)C5CCC4(C)C3(C)CC1	C30H46O6	501.322	432.705	0.144398238155999	[M-H]-	501.327;162.839;55.703;160.842;502.324	3.07344e+06
Soyasapogenol E base + O-HexA-Hex-dHex	terpenoids(萜类)	Abrus Cantoniensis(鸡骨草);Euchresta Japonica(山豆根);Euchresta Japonica(三小叶山豆根)	0.983509	O=C(O)C8OC(OC2CCC3(C)(C4CC=C1C5CC(C)(C)CC(=O)C5(C)(CCC1(C)C4(C)(CCC3(C2(C)(CO))))))C(OC7OC(CO)C(O)C(O)C7(OC6OC(C)C(O)C(O)C6(O)))C(O)C8(O)	C48H76O18	939.498	416.45	4.24940201383904	[M-H]-	939.49;939.524;940.528;112.986;497.108	3.07225e+06
1,7-bis(4-hydroxyphenyl)heptan-3-one	Phenols(酚类)	Curcuma Kwangsiensis(广西莪术)	0.867238	O=C(CCC1=CC=C(O)C=C1)CCCCC2=CC=C(O)C=C2	C19H22O3	297.152	533.552	1.83183855175976	[M-H]-	297.155;183.011;282.053;184.02;298.154	3.05769e+06
3-hydroxybenzoic acid	Aromaticity(芳香族化合物)	Glechoma Hederacea(连钱草);Equisetum Hyemale(木贼);Typha Angustata(蒲黄);Gastrodia Elata(天麻);Iphigenia(山慈姑);Urtica Dioica(异株荨麻)	0.951387	O=C(O)c1cccc(O)c1	C7H6O3	137.024	19.9937	2.13197617336698	[M-H]-	137.024;93.035;109.029;108.022;138.018	3.05592e+06
alpha-Hederin	terpenoids(萜类)	Hedera Helix(常春藤);Hedera Helix(洋常春藤);Caltha Palustris(马蹄叶);Kalopanax Septemlobus(刺楸树皮);Kalopanax Septemlobus(着色刺楸);Patrinia Scabiosifolia(黄花败酱);Clematis Tenuifolia(西藏铁线莲);Lonicera Japonica(金银花);Lonicera Japonica(忍冬藤);Capsicum Annuum(辣椒);Clematis Chinensis(威灵仙);Akebiae Fructus(预知子);Lonicera Fulvotomentosa(黄褐毛忍冬)	0.945711	CC1OC(OC2C(O)C(O)COC2OC2CCC3(C)C(CCC4(C)C3CC=C3C5CC(C)(C)CCC5(CCC43C)C(O)=O)C2(C)CO)C(O)C(O)C1O	C41H66O12	795.453	410.912	1.70654782240289	[M+HCOO]-	795.443;795.524;113.025;88.385;85.03	2.99455e+06
Soyasapogenol B base + O-HexA+HexA+dHex	terpenoids(萜类)		0.990391	O=C(O)C8OC(OC1C(OC(C(=O)O)C(O)C1(O))OC4CCC5(C)(C6C=CC3=C2CC(C)(C)CC(O)C2(C)CCC3(C)C6(C)(CCC5(C4(C)(CO)))))C(OC7OC(C)C(O)C(O)C7(O))C(O)C8(O)	C48H74O19	953.478	367.806	3.47622027540467	[M-H]-	953.474;953.509;497.108;113.025;954.534	2.95366e+06
Demethoxycurcumin	Phenols(酚类)	Curcuma Longa(姜黄);Curcuma Longa(黄姜);Curcuma Zedoaria(平莪术);Curcuma Zedoaria(莪术)	0.71473	COC1=C(C=CC(=C1)C=CC(=O)CC(=O)C=CC2=CC=C(C=C2)O)O	C20H18O5	337.108	460.276	0.942414515259996	[M-H]	337.11;282.054;338.109;281.045;293.047	2.83201e+06
Ginsenoside Rg5	terpenoids(萜类)	iridoid(环戊烷环烯醚萜类);lavandulane(薰衣草烷型单萜类);artemisane(蒿烷型单萜类);mycrane_monoterpenoids(月桂烷型单萜类);menthane_monoterpenoids(薄荷烷型单萜类);secoiridoid(裂环环烯醚萜类);cyclogeraniane(环香叶烷型单萜类)	0.91956	CC(C)=CCC=C(C)C1CCC2(C)C1C(O)CC1C3(C)CCC(OC4OC(CO)C(O)C(O)C4OC4OC(CO)C(O)C(O)C4O)C(C)(C)C3CCC21C	C42H70O12	767.493	577.403	1.98239548550089	[M+H]+	407.37;146.117;767.64;109.102;147.117	2.75644e+06
rutamarin	phenylpropanoids(苯丙素类)	coumarins(香豆素类)	1	O=C1OC=2C=C3OC(CC3=CC2C=C1C(C=C)(C)C)C(OC(=O)C)(C)C	C21H24O5	374.196	575.882	0.702692820804591	[M+NH4]+	163.077;374.36;105.034;312.324;118.086	2.69331e+06
Acetylpterosin C			0.999149	CC1C(O)C2=C(C1=O)C(C)=C(CCOC(C)=O)C(C)=C2	C16H20O4	277.142	263.258	4.39549202933585	[M+H]+	277.142;93.07;278.147;81.07;107.085	2.57896e+06
Glabrone	flavonoids(黄酮类)	isoflavones(异黄酮类)	0.766575	CC1(C=CC2=C(O1)C=CC(=C2O)C3=COC4=C(C3=O)C=CC(=C4)O)C	C20H16O5	337.108	511.667	1.81203017769895	[M+H]	337.109;153.018;295.062;338.108;319.092	2.55376e+06
Germacrone	terpenoids(萜类)	Sesquiterpenoids(倍半萜类)	0.861556	CC1=CCC(=C(C)C)C(=O)CC(=CCC1)C	C15H22O	219.174	586.647	3.84599338414673	[M+H]	219.176;57.069;163.112;203.142;220.177	2.50544e+06
Ginsenoside compound K	terpenoids(萜类)	Panax Pseudo-Ginseng(假人参)	0.725932	CC(C)=CCCC(C)(OC1OC(CO)C(O)C(O)C1O)C1CCC2(C)C1C(O)CC1C3(C)CCC(O)C(C)(C)C3CCC21C	C36H62O8	667.444	569.734	2.12441855216221	[M+HCOO]-	621.435;667.444;161.044;71.013;101.025	2.36055e+06
Hydroxytanshinone			0.747318	CC1=COC2=C1C(=O)C(=O)C1=C2C=CC2=C1C(O)CCC2(C)C	C19H18O4	311.129	487.79	1.65087691898329	[M+H]+	311.129;267.139;185.095;225.09;209.117	2.35572e+06
kojic acid		Citrus Medica Var. Sarcodactylis(佛手);Chaenomeles Sinensis(木瓜);Glycine Max(酱);Glycine Max(大豆);Glycine Max(豆油);Glycine Max(毛豆);Glycine Max(黑大豆);Dioscorea Tokoro(山萆薢)	0.937489	O=C1C=C(OC=C1O)CO	C6H6O4	141.019	957.065	3.39988414978437	[M-H]-	141.02;69.034;85.03;41.999;99.009	2.33057e+06
Ceanothic acid	terpenoids(萜类)	cyclogeraniane(环香叶烷型单萜类);secoiridoid(裂环环烯醚萜类);mycrane_monoterpenoids(月桂烷型单萜类);menthane_monoterpenoids(薄荷烷型单萜类);iridoid(环戊烷环烯醚萜类);lavandulane(薰衣草烷型单萜类);artemisane(蒿烷型单萜类)	0.832723	CC(=C)C1CCC2(CCC3(C)C(CCC4C5(C)C(C(O)C(C)(C)C5CCC34C)C(O)=O)C12)C(O)=O	C30H46O5	487.344	484.067	3.4920169270484	[M+H]+	487.336;233.155;187.147;173.133;175.148	2.26261e+06
ISOPALMITIC ACID	Fatty acids(脂肪酸类)	Mahoniae Caulis(功劳木);Arctium Lappa(牛蒡子);Arctium Lappa(牛蒡根);Arctium Lappa(牛蒡);Arctium Lappa(牛蒡叶)	0.99879	O=C(O)CCCCCCCCCCCCC(C)C	C16H32O2	255.233	12.9171	1.42902252142913	[M-H]-	255.233;59.014;256.235;67.107;136.639	2.21822e+06
Chaulmoogric Acid	Fatty acids(脂肪酸类)		1	O=C(O)CCCCCCCCCCCCC1C=CCC1	C18H32O2	298.274	603.135	1.03101531836084	[M+NH4]+	57.07;299.256;298.276;71.086;81.07	1.97816e+06
Licochalcone A	flavonoids(黄酮类)	Pogostemon Cablin(广藿香);Glycyrrhiza Inflata(胀果甘草);Glycyrrhiza Kansuensis(黄甘草);Glycyrrhiza Uralensis(甘草);Glycyrrhiza Uralensis(植物甘草);Glycyrrhiza Uralensis(乌拉尔甘草)	1	COC1=C(\C=C/C(=O)C2=CC=C(O)C=C2)C=C(C(O)=C1)C(C)(C)C=C	C21H22O4	337.145	441.291	0.331819122588801	[M-H]-	337.148;338.101;120.022;93.035;305.115	1.94807e+06
Piperlongumine	Amides(酰胺类)		0.680785	O=C(C=CC1=CC(OC)=C(OC)C(OC)=C1)N2C(=O)C=CCC2	C17H19NO5	340.119	437.766	2.01482377969693	[M+Na]+	340.117;310.07;325.097;341.12;269.041	1.85096e+06
Prexanthoperol	terpenoids(萜类)	cyclogeraniane(环香叶烷型单萜类);secoiridoid(裂环环烯醚萜类);mycrane_monoterpenoids(月桂烷型单萜类)	0.617778	CC(C)C1=CC2=C(C=C1O)C1(C)CCCC(C)(C)C1C(=O)C2=O	C20H26O3	315.196	570.628	0.687652026283651	[M+H]+	315.194;297.185;287.2;133.101;269.191	1.83644e+06
Ethylbenzene			0.984044	CCC1=CC=CC=C1	C8H10	107.086	547.136	1.702391006704	[M+H]+	107.085;91.054;108.055;42.034;105.07	1.75076e+06
Palmitic acid	Aliphatic acyl(脂肪酰类)	Scutellaria Baicalensis(黄芩);Scutellaria Baicalensis(黄岑);Ecklonia Kurome(昆布);Ecklonia Kurome(黑昆布);Canarii Fructus(青果);Piper Longum(荜拔);Lygodiaceae(曲轴海金沙);Lygodiaceae(海金沙);Cirsium Japonicum(大蓟);Pyrus Sp(梧桐子);Peucedanum Praeruptorum(白花前胡);Oroxylum Indicum(木蝴蝶树皮);Portulaca Oleracea(马齿苋);Portulaca Oleracea(鲜马齿苋);Hypericum Japonicum(地耳草);Scutellaria Lateriflora(黄苓);Allii Tuberosi Semen(韭菜种子);Curculigo …	1	O=C(O)CCCCCCCCCCCCCCC	C16H32O2	255.233	1.30765	1.59429192832133	[M-H]-	255.233;256.235;59.014;64.721;61.89	1.74152e+06
2,2,6,6-Tetramethyl-4 piperidone	alkaloid(生物碱)	piperidines(哌啶类生物碱)	0.605666	CC1(C)CC(=O)CC(C)(C)N1	C9H17NO	156.138	686.713	2.08658214650421	[M+H]+	156.1;72.08;114.102;42.034;156.99	1.73842e+06
4,4,8,10,14-pentamethyl-17-(4,5,6-trihydroxy-6-methylheptan-2-yl)-2,5,6,7,9,15-hexahydro-1H-cyclopenta[a]phenanthrene-3,16-dione	terpenoids(萜类)	lavandulane(薰衣草烷型单萜类);artemisane(蒿烷型单萜类);mycrane_monoterpenoids(月桂烷型单萜类);menthane_monoterpenoids(薄荷烷型单萜类);secoiridoid(裂环环烯醚萜类);cyclogeraniane(环香叶烷型单萜类)	0.722333	CC(CC(O)C(O)C(C)(C)O)C1=C2C=CC3C4(C)CCC(=O)C(C)(C)C4CCC3(C)C2(C)CC1=O	C30H46O5	487.342	589.828	0.0010286738701843	[M+H]+	451.318;433.306;469.328;309.22;185.132	1.73294e+06
Ingenol	terpenoids(萜类)	Euphorbia Lathyris(续随子茎中白汁);Euphorbia Lathyris(续随子 (大戟属));Euphorbia Lathyris(千金子);Isodon Inflexa(内折香茶菜);Euphorbia Esula(鸡肠狼毒);Euphorbia Esula(细叶大戟);Euphorbia Esula(乳浆大戟)	0.616185	CC1CC2C(C2(C)C)C3C=C(C(C4(C1(C3=O)C=C(C4O)C)O)O)CO	C20H28O5	347.186	525.947	0.113798173109051	[M-H]	303.199;347.185;99.009;259.206;348.041	1.62002e+06
Medicagenic acid	terpenoids(萜类)	Aster Novi-Belgii(紫菀)	0.89372	CC1(C)CCC2(CCC3(C)C(=CCC4C5(C)CC(O)C(O)C(C)(C5CCC34C)C(O)=O)C2C1)C(O)=O	C30H46O6	501.322	460.702	0.345905376194662	[M-H]-	501.327;55.703;502.327;457.333;439.318	1.47072e+06
Maslinic acid	terpenoids(萜类)	Akebia Trifoliata(三叶木通)	1	CC1(C)CCC2(CCC3(C)C(=CCC4C5(C)CC(O)C(O)C(C)(C)C5CCC34C)C2C1)C(O)=O	C30H48O4	471.348	560.175	0.042827785210151	[M-H]-	471.352;472.352;52.373;377.284;391.301	1.44684e+06
(10-acetyloxy-8,8-dimethyl-2-oxo-9,10-dihydropyrano[2,3-f]chromen-9-yl) (Z)-2-methylbut-2-enoate	phenylpropanoids(苯丙素类)	coumarins(香豆素类)	0.797525	O=C1OC2=C(C=C1)C=CC=3OC(C)(C)C(OC(=O)C(=CC)C)C(OC(=O)C)C32	C21H22O7	409.126	513.48	0.392519123704647	[M+Na]+	409.126;83.049;55.054;227.07;327.126	1.40635e+06
Smilagenone	terpenoids(萜类)	cyclogeraniane(环香叶烷型单萜类);mycrane_monoterpenoids(月桂烷型单萜类);menthane_monoterpenoids(薄荷烷型单萜类);iridoid(环戊烷环烯醚萜类);lavandulane(薰衣草烷型单萜类);artemisane(蒿烷型单萜类);secoiridoid(裂环环烯醚萜类)	0.797379	CC1C2C(CC3C4CCC5CC(=O)CCC5(C)C4CCC23C)OC11CCC(C)CO1	C27H42O3	415.321	573.133	0.911853823055621	[M+H]+	271.206;415.326;253.195;119.086;69.07	1.35836e+06
2,3-Dihydroxy-1-(4-hydroxy-3-methoxyphenyl)-1-propanone			0.748002	COC1=C(O)C=CC(=C1)C(=O)C(O)CO	C10H12O5	213.076	13.3295	0.351727488527912	[M+H]+	69.07;57.07;83.049;93.07;167.072	1.313e+06
Tetrasaccharides (Hex-Hex-Hex-Hex)		Plantago Asiatica(车前);Plantago Asiatica(植物车前);Plantago Asiatica(车前草);Rehmannia Glutinosa(干地黄);Rehmannia Glutinosa(熟地黄);Rehmannia Glutinosa(生地黄);Rehmannia Glutinosa(紫地黄);Rehmannia Glutinosa(地黄);Rehmannia Glutinosa(鲜地黄(生地));Ramulus Mori(桑枝);Dolicho Lablab(白扁豆);Centella Asiatica(积雪草);Centella Asiatica(崩大碗)	0.676035	OCC4OC(OCC3OC(OCC2OC(OC1(OC(CO)C(O)C1(O))(CO))C(O)C(O)C2(O))C(O)C(O)C3(O))C(O)C(O)C4(O)	C24H42O21	665.214	934.243	0.111453420546119	[M-H]-	665.214;383.122;179.055;89.024;101.025	1.29777e+06
Moracin I			0.998794	COC1=CC(O)=CC(C2=CC3=C(O2)C=C(O)C=C3)=C1CC=C(C)C	C20H20O4	325.142	449.654	4.25418176280667	[M+H]+	325.139;307.129;348.157;326.147;308.132	1.29079e+06
Chikusetsusaponin IV	terpenoids(萜类)	Aralia Chinensis(楤木);Panax Japonicus(竹节参);Panax Japonicus(竹节人参);Panax Ginseng(人参芦);Panax Ginseng(人参叶);Panax Ginseng(人参花蕾);Panax Ginseng(人参);Tetrapanax Papyrifer(通脱木);Codonopsis Convolvulacea(珠子参);Codonopsis Convolvulacea(鸡蛋参);Aralia Elata(辽东楤木叶);Aralia Elata(辽东楤木)	0.980313	CC1(C)CCC2(CCC3(C)C(=CCC4C5(C)CCC(OC6OC(C(OC7OC(CO)C(O)C7O)C(O)C6O)C(O)=O)C(C)(C)C5CCC34C)C2C1)C(=O)OC1OC(CO)C(O)C(O)C1O	C47H74O18	925.477	413.92	3.06803957014836	[M-H]-	925.473;925.507;629.36;926.522;863.491	1.23601e+06
9-hydroxy-7-(2-hydroxypropan-2-yl)-1,4a-dimethyl-2,3,4,9,10,10a-hexahydrophenanthrene-1-carboxylic acid	terpenoids(萜类)	cyclogeraniane(环香叶烷型单萜类);secoiridoid(裂环环烯醚萜类);mycrane_monoterpenoids(月桂烷型单萜类)	0.833073	O=C(O)C1(C)CCCC2(C3=CC=C(C=C3C(O)CC12)C(O)(C)C)C	C20H28O4	333.207	570.628	2.6033606287546	[M+H]+	315.193;287.201;333.205;187.147;297.185	1.19977e+06
Asiatic Acid	terpenoids(萜类)	Verbena Officinalis(马鞭草)	1	O=C(O)C12CCC(C)C(C)C2C3=CCC4C5(C)CC(O)C(O)C(C)(CO)C5CCC4(C)C3(C)CC1	C30H48O5	487.342	495.42	1.91734253609049	[M-H]-	487.34;488.351;54.15;111.009;461.662	1.17793e+06
Saikosaponin a	terpenoids(萜类)	Bupleurum Chinense(柴胡);Bupleurum Chinense(北柴胡)	0.736399	CC1OC(OC2CCC3(C)C(CCC4(C)C3C=CC35OCC6(CCC(C)(C)CC36)C(O)CC45C)C2(C)CO)C(O)C(OC2OC(CO)C(O)C(O)C2O)C1O	C42H68O13	825.463	420.084	1.52534289646888	[M+HCOO]-	779.47;455.355;779.522;617.401;101.024	1.08036e+06
2,3-dihydroxypropyl hexadecanoate			0.965633	CCCCCCCCCCCCCCCC(=O)OCC(O)CO	C19H38O4	313.274	676.2	0.0488689573533577	[M-H2O+H]+	313.274;57.07;71.085;314.343;85.101	1.07641e+06
ent-16a-Hydroxy-17-acetoxy-19-kauranal	terpenoids(萜类)	cyclogeraniane(环香叶烷型单萜类);lavandulane(薰衣草烷型单萜类);artemisane(蒿烷型单萜类);mycrane_monoterpenoids(月桂烷型单萜类);menthane_monoterpenoids(薄荷烷型单萜类);secoiridoid(裂环环烯醚萜类)	0.666436	CC(=O)OCC1(O)CC23CC1CCC2C1(C)CCCC(C)(C=O)C1CC3	C22H34O4	363.254	534.793	2.01085014350096	[M+H]+	261.186;85.065;57.07;363.256;262.187	1.00093e+06
(1alpha,6alpha,7alphaH)-2,4(15)-Copadiene	terpenoids(萜类)	secoiridoid(裂环环烯醚萜类);lavandulane(薰衣草烷型单萜类);artemisane(蒿烷型单萜类);mycrane_monoterpenoids(月桂烷型单萜类);menthane_monoterpenoids(薄荷烷型单萜类)	1	CC(C)C1CCC2(C)C3C=CC(=C)C2C13	C15H22	203.18	561.736	1.90970039366997	[M+H]+	203.18;204.141;95.085;147.117;105.07	970863
9-hydroxy-10,12-octadecadienoic acid	Aliphatic acyl(脂肪酰类)	Coix Lacryma-Jobi Var. Ma-Yuen(薏苡仁)	0.739032	O=C(O)CCCCCCCC(O)C=CC=CCCCCC	C18H32O3	295.228	562.115	1.51435361833495	[M-H]-	295.227;195.141;277.216;59.014;55.166	899333
Ganoderic acid X	terpenoids(萜类)	secoiridoid(裂环环烯醚萜类);iridoid(环戊烷环烯醚萜类);lavandulane(薰衣草烷型单萜类);artemisane(蒿烷型单萜类);mycrane_monoterpenoids(月桂烷型单萜类);cyclogeraniane(环香叶烷型单萜类)	0.729949	CC(CC\C=C(/C)C(O)=O)C1CC(OC(C)=O)C2(C)C3=CCC4C(C)(C)C(O)CCC4(C)C3=CCC12C	C32H48O5	513.358	603.135	0.489883961884544	[M+H]+	453.34;513.36;435.329;295.245;213.163	864649
Enoxolone	terpenoids(萜类)	Glycyrrhiza Kansuensis(黄甘草);Glycyrrhiza Yunnanensis(云南甘草);Glycyrrhiza Aspera(粗毛甘草);Glycyrrhiza Uralensis(甘草);Glycyrrhiza Uralensis(植物甘草);Glycyrrhiza Uralensis(乌拉尔甘草);Yokukansan(抑肝散);Glycyrrhiza Inflata(胀果甘草);Prunella Vulgaris(夏枯草);Abrus Cantoniensis(鸡骨草);Glycyrrhiza Glabra(光果甘草);Glycyrrhiza Glabra(欧亚甘草)	0.998627	CC1(C2CCC3(C(C2(CCC1O)C)C(=O)C=C4C3(CCC5(C4CC(CC5)(C)C(=O)O)C)C)C)C	C30H46O4	469.333	496.671	1.43324564046553	[M-H]-	469.331;470.337;52.149;406.036;152.997	827860
Asiaticoside	terpenoids(萜类)	Akebia Trifoliata(三叶木通);Hydrocotyle Sibthorpioides(天胡荽);Centella Asiatica(积雪草);Centella Asiatica(崩大碗)	0.958675	CC1CCC2(CCC3(C)C(=CCC4C5(C)CC(O)C(O)C(C)(CO)C5CCC34C)C2C1C)C(=O)OC1OC(COC2OC(CO)C(OC3OC(C)C(O)C(O)C3O)C(O)C2O)C(O)C(O)C1O	C48H78O19	957.504	496.044	2.48405725735584	[M-H]-	957.513;957.477;958.514;911.503;911.47	805565
Bavachinin	flavonoids(黄酮类)	dihydrochalcones(二氢查尔酮类);flavanones(二氢黄酮类)	0.873534	CC(=CCC1=CC2=C(C=C1OC)OC(CC2=O)C3=CC=C(C=C3)O)C	C21H22O4	339.159	529.297	1.07600287973761	[M+H]	339.162;147.045;69.071;219.102;271.095	791388
Stearic acid	Fatty acids(脂肪酸类)	Abrus Cantoniensis(鸡骨草);Aquilaria Sinensis(白木香);Aquilaria Sinensis(牙香树);Aquilaria Sinensis(植物沉香);Pongamia Pinnata(水流豆);Bupleurum Chinense(柴胡);Bupleurum Chinense(北柴胡);Saxifraga Stolonifera(虎耳草);Descurainia Sophia(葶苈子);Descurainia Sophia(播娘蒿);Descurainia Sophia(南葶苈子);Cassia Obtusifolia(决明);Cassia Obtusifolia(决明,钝叶决明);Saposhnikovia Divaricata(防风);Alisma Orientale(泽泻);Lytta Vesicatoria(斑蝥);Lytta Vesi…	0.605873	CCCCCCCCCCCCCCCCCC(=O)O	C18H36O2	283.264	25.7309	0.292982725241364	[M-H]-	283.263;50.145;133.674;222.474;89.547	707608
Rosmadial	terpenoids(萜类)	mycrane_monoterpenoids(月桂烷型单萜类);cyclogeraniane(环香叶烷型单萜类)	0.971624	CC(C)C1=C(O)C2=C(C(C=O)=C1)C1(CCCC(C)(C)C1C=O)C(=O)O2	C20H24O5	345.169	526.801	1.4486167666192	[M+H]+	345.173;95.086;245.084;67.619;64.009	624040
Kukoamine B	alkaloid(生物碱)	Lycium Chinese(枸杞)	0.66037	C1=CC(=C(C=C1CCC(=O)NCCCNCCCCN(CCCN)C(=O)CCC2=CC(=C(C=C2)O)O)O)O	C28H42N4O6	529.305	650.499	0.803403258284169	[M-H]	529.307;96.96;58.813;530.302;79.957	511799
